# Supplementary material
Source: HighWire-hosted journal article supplement (https://gut.bmj.com/content/gutjnl-2024-334589)
Supplement: inline-supplementary-material-6 [file inline-supplementary-material-6.xlsx]

## Sheet: Sheet1
Supplementary table 5 Differential gene expression table SRC vs PDC
	logFC	logCPM	PValue	FDR
CXCL14	0.881089	9.2617	1.75962e-05	0.0318844
DMBT1	-2.05962	9.96571	0.000108955	0.0563761
SERPINA1	-2.71072	10.8696	0.000111032	0.0563761
APOC2	0.548516	8.99901	0.000159235	0.0563761
IL1R2	0.99558	9.35533	0.000174944	0.0563761
OASL	0.569437	8.88939	0.000186676	0.0563761
FN1	-1.08534	9.88776	0.000262526	0.0679568
APP	-0.874431	9.95318	0.000306655	0.0694573
HPGD	0.66917	8.9259	0.000665896	0.121773
CD44	-1.14062	9.83301	0.000672036	0.121773
TPSAB1	-1.10576	10.9616	0.00106908	0.176107
CD24	-1.43764	11.9689	0.00126251	0.190639
MEF2C	0.504436	8.78363	0.00142248	0.198271
MMP7	-2.23207	10.115	0.00170878	0.210326
CREB3L3	0.515917	8.69387	0.00174111	0.210326
ADM	0.592167	9.09523	0.00187466	0.212305
FGF8	0.498501	9.21019	0.00203962	0.217399
CD36	0.503927	9.21669	0.00219003	0.220463
APOA4	0.736558	9.00572	0.00249641	0.238079
CCL27	0.512435	8.46785	0.00354146	0.320856
WNT6	0.627029	8.50169	0.00396758	0.336674
SELP	0.441006	8.88636	0.00408765	0.336674
RPL23	-0.836789	12.562	0.00572028	0.428999
GNLY	0.409242	8.96739	0.00589196	0.428999
AFDN	0.428284	8.79267	0.00629131	0.428999
POU2AF1	0.38585	9.12234	0.00631707	0.428999
CD207	0.437685	8.74197	0.00665587	0.428999
CEACAM3	0.544119	8.19392	0.006909	0.428999
PRAME	0.492178	8.43611	0.00696979	0.428999
LAIR1	0.44154	8.58748	0.0078301	0.428999
EPCAM	-0.805792	10.6698	0.0080982	0.428999
ICAM2	0.443019	9.06412	0.00827482	0.428999
HHIP	0.421932	8.82431	0.00865237	0.428999
ENG	0.375368	9.06385	0.00866932	0.428999
MUC4	0.416993	8.7466	0.00914465	0.428999
TNFRSF13B	0.400076	9.01747	0.00935823	0.428999
INHBB	0.524271	8.46997	0.00945173	0.428999
LY6E	-0.589919	9.5062	0.00957346	0.428999
IL1RN	0.408458	9.10804	0.0098961	0.428999
CD14	0.381092	9.06516	0.00996148	0.428999
CXCL5	-1.62447	8.57321	0.0100522	0.428999
SIRPB2	0.373232	9.07206	0.0101293	0.428999
CCL25	0.498559	8.89341	0.0102135	0.428999
DLL4	0.386384	9.16273	0.0106508	0.428999
LGALS9	0.473356	9.82889	0.0108095	0.428999
SMPD3	0.510835	9.37529	0.0108907	0.428999
IL1R1	0.471252	8.87876	0.0116543	0.429502
IL13RA2	0.498049	8.22073	0.0122402	0.429502
CALML3	0.724789	8.70363	0.0123657	0.429502
MASP1	0.381542	8.87268	0.0124471	0.429502
IBSP	0.386419	8.84158	0.0124628	0.429502
LILRA4	0.414534	8.66328	0.0127608	0.429502
TNFRSF4	0.396432	9.00248	0.0127926	0.429502
ITGAE	0.409604	8.65717	0.0131942	0.429502
CFB	-0.61163	9.04829	0.0135769	0.429502
MPPED1	0.373269	9.05721	0.0136687	0.429502
RPS27A	-0.526068	11.1581	0.0139225	0.429502
SPP1	0.439495	8.62342	0.0139457	0.429502
PLA2G4F	0.35165	9.03358	0.0150118	0.429502
LYZ	-1.00126	14.7166	0.0151017	0.429502
FGF10	0.355046	9.00893	0.0151254	0.429502
WNT3A	0.470655	8.44019	0.0152791	0.429502
HLA_DQA1	0.350612	9.05593	0.0153599	0.429502
ACOT12	0.372541	8.88507	0.0154915	0.429502
CEBPE	0.436827	8.45377	0.0158556	0.429502
CASP12	0.385651	8.75275	0.016194	0.429502
CNTFR	0.357662	8.95934	0.0167396	0.429502
ASPG	0.441501	8.33495	0.0169787	0.429502
IL1B	0.358909	9.04202	0.0170063	0.429502
AKR1C4	0.376692	8.80265	0.0172008	0.429502
TNFSF8	0.346154	8.96187	0.0188318	0.429502
CD79B	0.366457	8.78208	0.0189551	0.429502
CXCR1	0.403336	8.5277	0.0190057	0.429502
C8A	0.378554	8.74543	0.0190237	0.429502
EGR1	-0.867202	9.98581	0.0195513	0.429502
MAGEC2	0.340757	8.9996	0.0202976	0.429502
CXCR3	0.40631	8.65855	0.0203074	0.429502
EBI3	0.372928	8.86271	0.0203423	0.429502
CCL24	0.382749	8.69829	0.0203669	0.429502
PBX3	0.388973	8.62358	0.0204289	0.429502
GPT	0.512349	9.83104	0.0206158	0.429502
C3	-0.614371	9.92995	0.0208691	0.429502
GIMAP6	0.373014	8.72239	0.0209768	0.429502
OAS1	0.327187	9.11843	0.0210267	0.429502
DEFB134	0.348789	8.88173	0.0210339	0.429502
DLL1	0.345145	8.96284	0.0211433	0.429502
BMP5	0.467815	8.15409	0.021736	0.429502
ADA	0.345496	8.92814	0.0220204	0.429502
CTSW	0.343476	8.9262	0.0220204	0.429502
SOX17	0.362923	8.77568	0.0221661	0.429502
SNAI2	0.350642	8.89824	0.0222197	0.429502
TPM1	-0.607979	10.681	0.0226059	0.429502
AICDA	0.433986	8.29873	0.022694	0.429502
PROM1	0.416799	8.70401	0.0228346	0.429502
PSAT1	0.345067	8.97438	0.0229706	0.429502
ALDOA	-0.733069	10.2506	0.0231873	0.429502
TCL1A	0.342016	8.99611	0.0234321	0.429502
CDK6	-0.370048	9.03676	0.023832	0.429502
SETBP1	0.396315	8.46476	0.0240833	0.429502
FUT7	0.377108	8.58466	0.0241187	0.429502
CT45A1	0.452635	8.94825	0.0243039	0.429502
RPL7A	-0.74237	11.9813	0.0243183	0.429502
GADL1	0.362256	8.756	0.0244143	0.429502
PRKACG	0.428489	8.26672	0.0251895	0.436838
FGF13	0.341362	8.92371	0.0254785	0.436838
SDHA	-0.464182	9.78596	0.0255545	0.436838
PTCH1	0.321799	9.12082	0.0259359	0.439096
ILF3	-0.420787	9.90342	0.0261713	0.439096
DIPK2B	0.3746	8.75339	0.0269116	0.441412
CTAG1B	0.479097	8.98333	0.0273729	0.441412
PDCD1	0.446792	9.29012	0.0275331	0.441412
SNAI1	0.330452	8.93722	0.0276479	0.441412
TSLP	0.37603	9.22689	0.0277249	0.441412
IL2RA	0.35547	8.72479	0.027771	0.441412
CPA3	-0.44683	8.9769	0.0282526	0.442503
SELE	0.409982	8.33028	0.0283583	0.442503
ZBTB32	0.341751	8.83963	0.0285722	0.442503
HK2	0.372561	8.59602	0.0312046	0.475819
NKX3_1	0.343704	8.81816	0.0313948	0.475819
ADH4	0.355292	8.7547	0.0320431	0.475819
XRCC4	0.329089	8.86951	0.0326582	0.475819
BDNF	0.32756	8.86379	0.0336863	0.475819
SOX11	0.358006	8.67804	0.0336913	0.475819
ELOB	-0.454584	9.45268	0.0339619	0.475819
GZMB	0.344696	8.74096	0.0341464	0.475819
MYCN	0.304023	9.06384	0.0349805	0.475819
DPP4	-0.439936	8.93117	0.0351515	0.475819
EPOR	0.330311	8.82272	0.0351758	0.475819
PRKCD	0.326576	9.09707	0.035695	0.475819
BRAF	0.375919	8.51969	0.0357955	0.475819
CSF2	0.331798	8.89598	0.0358345	0.475819
CCL26	0.383707	8.43863	0.0360954	0.475819
BATF	0.347698	8.62564	0.0362421	0.475819
ERCC6	0.320552	8.92955	0.0365978	0.475819
HK1	0.32387	8.84158	0.0369667	0.475819
SLAMF1	0.373837	8.46672	0.0371858	0.475819
IRF7	0.548324	8.62521	0.0374236	0.475819
PF4	0.359595	8.58191	0.037738	0.475819
HOXA11	0.330529	8.77541	0.0378976	0.475819
CAMK2B	0.32824	8.77853	0.0378976	0.475819
CREB5	0.334126	8.89147	0.0380296	0.475819
KRT1	0.319797	9.01551	0.0381458	0.475819
COX4I1	-0.517603	10.7355	0.0386449	0.475819
H3C8	-0.617928	9.46357	0.0390982	0.475819
TRAT1	0.334333	8.78842	0.0411039	0.475819
WNT5A	0.376682	8.40002	0.0412935	0.475819
FUT5	0.390537	8.30962	0.0415171	0.475819
MRC1	0.331789	8.75708	0.0416337	0.475819
CCL18	0.657749	9.4219	0.0420428	0.475819
SFRP1	0.325109	8.77844	0.0424032	0.475819
IL7	0.370918	8.43265	0.0424999	0.475819
MFGE8	0.283844	9.07053	0.0427839	0.475819
EFNA3	0.404781	8.57531	0.0428737	0.475819
KLRF1	0.361463	8.46431	0.0436713	0.475819
IFIT1	0.322237	8.83154	0.0438749	0.475819
PLA2G3	0.324734	8.73925	0.0443251	0.475819
WNT2	0.389059	8.2898	0.0444573	0.475819
CD8B	0.290528	9.10696	0.0450289	0.475819
CD8A	0.378346	9.01337	0.0450792	0.475819
CDC25A	0.324286	8.7688	0.0451249	0.475819
NPM1	-0.485202	8.17958	0.0452571	0.475819
CCL15	0.987874	9.77503	0.0456358	0.475819
FGCR2A	0.314544	9.29173	0.0459064	0.475819
SOD1	-0.383677	10.5781	0.0461326	0.475819
GDF15	-0.558009	9.64266	0.0464927	0.475819
LCK	0.359952	8.83034	0.0467366	0.475819
MAGEC1	0.284192	9.12174	0.0468147	0.475819
RPS6	-0.625832	12.4695	0.0470728	0.475819
IFNG	0.319619	8.78324	0.0473397	0.475819
DACH2	0.398974	8.21944	0.0476865	0.475819
TPI1	0.335921	9.27435	0.0477383	0.475819
TNFSF9	0.311261	8.75131	0.0480193	0.475819
POLD4	0.304866	8.87032	0.048085	0.475819
GZMM	0.380048	8.34675	0.0481081	0.475819
LY9	0.294146	9.10466	0.0484074	0.475819
LY86	0.383198	9.37425	0.0487391	0.475819
CMKLR1	0.307024	8.83686	0.0488452	0.475819
HLA_DPB1	0.305781	8.83491	0.0488452	0.475819
IL21R	0.281823	9.12542	0.048996	0.475819
ROBO4	0.353967	8.5112	0.0490109	0.475819
CD300A	0.279792	9.08898	0.0490758	0.475819
CLEC4E	0.329374	8.67878	0.0493447	0.475819
CXCR5	0.310261	8.7688	0.0503532	0.475819
ISG15	0.281882	9.08188	0.0505015	0.475819
PAK3	0.298261	8.97235	0.0506895	0.475819
ADGRE1	0.309665	8.90699	0.0509259	0.475819
RRAS2	0.306022	8.85052	0.0510834	0.475819
THBS1	-0.465997	9.74088	0.0511219	0.475819
ATP2A2	-0.346728	9.14491	0.0512191	0.475819
SRSF2	-0.390001	9.60244	0.0515719	0.475819
VSIR	0.286645	8.95424	0.0522006	0.475819
AKT2	-0.308882	8.79563	0.0524355	0.475819
RASGRF1	0.304192	8.92545	0.0531256	0.475819
SHC3	0.297838	8.92468	0.0531256	0.475819
NPM2	0.284371	9.00004	0.0533902	0.475819
RSAD2	0.296766	8.89362	0.0540561	0.475819
CCL3_L1	0.584264	9.25592	0.054337	0.475819
SIRPA	0.257659	9.19787	0.0546934	0.475819
BMP7	0.40772	8.07529	0.0547867	0.475819
WNT3	0.298925	8.86656	0.0549906	0.475819
PGR	0.312718	8.7445	0.0552314	0.475819
C8G	0.322421	8.65207	0.0559666	0.475819
CASP9	0.3081	8.71326	0.0560822	0.475819
TNC	0.307246	9.0732	0.0561815	0.475819
H3_3A	-0.488292	11.0651	0.0565623	0.475819
OSM	0.286777	8.9876	0.0565853	0.475819
SPIB	0.311839	8.86233	0.0569572	0.475819
RET	0.431213	9.11106	0.0571791	0.475819
FAAP24	0.295242	8.88055	0.057374	0.475819
TMEM163	0.362008	9.32541	0.0575941	0.475819
PDGFRA	0.268268	9.15257	0.058074	0.475819
CCL1	0.378298	8.80629	0.0580981	0.475819
POLR2J	0.333223	8.53619	0.058241	0.475819
BCL2L1	-0.349919	9.51535	0.0585397	0.475819
TLR9	0.294749	8.81825	0.0594047	0.475819
CYP19A1	0.311226	8.69602	0.0596692	0.475819
LIFR	0.401883	8.10695	0.0608636	0.475819
FCER2	0.333592	8.48749	0.0608944	0.475819
WNT7B	0.33363	8.57449	0.0609278	0.475819
LAMC3	0.32481	8.55746	0.0612951	0.475819
S100A8	0.309696	8.68724	0.0615466	0.475819
FPR2	0.370924	8.22822	0.0623274	0.475819
SRR	0.304291	9.26676	0.0623612	0.475819
PIK3R5	0.289311	8.85993	0.0627268	0.475819
MTOR	0.276278	9.01294	0.0628956	0.475819
PKMYT1	0.332472	8.48051	0.0629013	0.475819
TNF	0.421992	9.58996	0.0631926	0.475819
OTOA	0.281256	8.95961	0.0635419	0.475819
IKBKG	0.330316	9.19388	0.0635621	0.475819
CSF1R	0.29622	9.27429	0.063641	0.475819
IFNA1	0.340106	8.43685	0.0636592	0.475819
FGF17	0.342658	8.72437	0.0642121	0.475819
TSPAN7	0.269895	9.0793	0.0644801	0.475819
CD247	0.281095	9.0066	0.064719	0.475819
SLC11A1	0.340403	9.16514	0.0650376	0.475819
RELN	0.347788	8.35474	0.0650548	0.475819
SOCS2	0.308395	8.67666	0.0654777	0.475819
NAT8L	0.305171	8.97548	0.0656301	0.475819
CACNB2	0.314679	8.63507	0.0665343	0.475819
ID4	0.31308	8.63883	0.0665343	0.475819
PRKAA2	0.286163	8.92772	0.0666879	0.475819
MMP9	0.278375	8.92409	0.0666879	0.475819
FOS	-0.55734	10.5557	0.0668466	0.475819
ERG	0.318073	8.60274	0.0675824	0.475819
PAX3	0.283203	8.97089	0.0679346	0.475819
TICAM1	0.250192	9.1538	0.0681499	0.475819
BRD4	-0.268938	9.11773	0.0683735	0.475819
GATA1	0.273468	8.99358	0.0685202	0.475819
PIM1	0.264872	9.08561	0.0686896	0.475819
CEACAM8	0.329245	8.44795	0.0693267	0.475819
CACNA1D	0.30563	8.5907	0.0697377	0.475819
KLRK1	0.296861	8.80712	0.0698539	0.475819
IL19	0.297589	8.74865	0.0703037	0.475819
FAM30A	0.299731	8.68602	0.0706301	0.475819
H3_5	-0.436995	9.37533	0.0706726	0.475819
ELANE	0.275023	8.91242	0.0706772	0.475819
FASLG	0.292796	8.77605	0.071153	0.475819
KRT6A	0.334052	8.44382	0.0716108	0.475819
NDUFS8	-0.279664	9.10574	0.0719173	0.475819
TNFSF13B	0.288286	8.79831	0.0719674	0.475819
ITGA5	0.285819	8.8002	0.0719674	0.475819
GLI1	0.315106	8.72679	0.0721166	0.475819
NGF	0.287632	9.07181	0.0721932	0.475819
PLAU	0.298298	8.72792	0.0723996	0.475819
IL13	0.320843	8.4742	0.0729449	0.475819
BIRC7	0.290868	8.76674	0.0733202	0.475819
TSC1	0.268435	8.92739	0.0734089	0.475819
SOX10	0.285283	8.85259	0.0734957	0.475819
FGF12	0.270663	8.95064	0.0740322	0.475819
RUNX3	0.284833	8.79114	0.0741431	0.475819
CHIT1	0.308649	8.65843	0.0742409	0.475819
SELPLG	0.283471	8.89803	0.0748971	0.475819
NOX1	0.277998	8.90038	0.0748971	0.475819
FOXC1	0.280734	8.81724	0.0749312	0.475819
LAMB4	0.330363	8.38937	0.0749636	0.475819
PECAM1	0.255782	9.08968	0.0751334	0.475819
TLR4	0.320272	8.53798	0.0754471	0.475819
PNOC	0.297792	8.69931	0.0760545	0.475819
WNT11	0.318272	8.49269	0.0766264	0.475819
SH2D1B	0.28461	8.87549	0.0767142	0.475819
BCL2	0.257009	9.06478	0.0767591	0.475819
WNT10A	0.266996	8.99131	0.0773507	0.475819
CD80	0.293822	8.75044	0.0778492	0.475819
PTPRR	0.269765	9.01342	0.0778968	0.475819
MASP2	0.26559	8.93752	0.0783869	0.475819
CMA1	0.286631	8.77566	0.0786883	0.475819
SIX1	0.280497	8.77791	0.0786883	0.475819
SERPINB2	0.286436	8.80475	0.0794904	0.475819
SLAMF6	0.282696	8.80048	0.0794904	0.475819
ITGB3	0.264271	8.96787	0.0797078	0.475819
IRF4	0.31754	8.44402	0.0803263	0.475819
NCR1	0.28702	8.7723	0.0810614	0.475819
G6PD	0.270559	8.87699	0.0816868	0.475819
ANGPT2	0.282363	8.79538	0.0818699	0.475819
CDKN2A	0.281684	8.79779	0.0818699	0.475819
NKG7	0.268968	8.90292	0.0823528	0.475819
MPL	0.284145	8.73475	0.0826503	0.475819
MIA	-0.433086	9.23879	0.0828047	0.475819
RRAD	0.294725	8.88055	0.0830695	0.475819
NOS3	0.287905	8.67183	0.0833099	0.475819
FCER1G	0.246463	9.0654	0.0838692	0.475819
UBC	-0.490788	11.5948	0.0840931	0.475819
NOS1	0.262366	8.97158	0.0841683	0.475819
IL3	0.289997	8.70474	0.0842556	0.475819
TLR10	0.325641	8.46961	0.0843089	0.475819
MLH1	0.27547	8.89548	0.0847478	0.475819
SIRT4	0.274768	8.89383	0.0847478	0.475819
PALMD	0.288873	8.73051	0.0851577	0.475819
BAG1	0.267178	8.92096	0.0853844	0.475819
STK11IP	0.321649	9.08394	0.0853925	0.475819
CR2	0.31398	8.5023	0.0856072	0.475819
GRIA3	0.31841	8.42412	0.0856546	0.475819
KIR3DL3	0.316237	8.42803	0.0856546	0.475819
CLEC5A	0.27401	8.83951	0.0858345	0.475819
CLU	-0.683544	10.969	0.0861557	0.475819
CCR1	0.302869	8.59945	0.0864474	0.475819
KAT2B	0.302341	8.60112	0.0864474	0.475819
ACTR3B	0.371983	9.27694	0.0867024	0.475819
SIGLEC5	0.276408	8.77961	0.0868375	0.475819
LBP	0.32724	8.38578	0.0869783	0.475819
CD70	0.273191	8.80653	0.0876182	0.475819
NODAL	0.284786	8.72044	0.087739	0.475819
SIGLEC1	0.266497	8.9134	0.0878475	0.475819
PTCRA	0.303367	9.15832	0.0884512	0.475819
HSPA2	0.277435	8.74964	0.0886051	0.475819
VTCN1	0.291891	9.27161	0.0893227	0.475819
CDH2	0.282932	8.77535	0.0894296	0.475819
RIMKLA	0.330308	8.29618	0.0895315	0.475819
ITGA7	0.314003	8.37607	0.0898413	0.475819
CXCR2	0.292784	8.6199	0.0902204	0.475819
ITGA4	0.281913	8.71417	0.0903962	0.475819
IDO1	0.278852	8.71251	0.0903962	0.475819
NANOG	0.280042	9.21863	0.0906508	0.475819
SSX4	0.308082	9.28549	0.0907945	0.475819
SMARCA4	-0.249459	9.20476	0.0911978	0.475819
RXRG	0.276192	8.67793	0.0922094	0.475819
C1QB	0.319406	9.19947	0.0924103	0.475819
HLA_G	0.267927	8.79111	0.092884	0.475819
NEIL1	0.268454	9.06801	0.0929258	0.475819
STAT4	0.263812	8.89857	0.0929798	0.475819
FZD9	0.288393	8.61625	0.0930154	0.475819
CCNA2	0.327197	9.3779	0.0935188	0.475819
TIE1	0.268841	8.82078	0.093632	0.475819
IL5	0.288235	8.63963	0.094043	0.475819
MAML2	0.25282	8.96543	0.0947006	0.475819
GADD45B	0.253119	8.86608	0.0950148	0.475819
HACD2	0.249293	9.0106	0.0956975	0.475819
COL4A5	0.291576	8.6062	0.0958948	0.475819
TSHR	0.286417	8.69877	0.095947	0.475819
MMRN2	0.280551	8.69675	0.095947	0.475819
ZBTB20	0.336965	8.13469	0.0962035	0.475819
BAX	-0.372108	9.56043	0.0962801	0.475819
SOX9	-0.298131	9.60215	0.0964589	0.475819
SOST	0.29761	8.46444	0.0971155	0.475819
C1QA	0.337343	9.33978	0.0978298	0.475819
XCR1	0.522115	9.39865	0.0981254	0.475819
MDC1	0.295633	8.4944	0.0984123	0.475819
TP73	0.267659	8.77893	0.0984545	0.475819
CEACAM6	-0.74601	9.93001	0.0984884	0.475819
GRIN1	0.389689	9.22058	0.0986805	0.475819
PCK1	0.258994	8.9099	0.0990004	0.475819
PPP3R2	0.272608	8.718	0.0997289	0.475819
TNFRSF9	0.309152	8.37569	0.100559	0.475819
CDH3	0.264231	8.74497	0.100566	0.475819
PKM	-0.371229	10.331	0.100634	0.475819
MAP4K2	0.309715	9.46218	0.101282	0.475819
MMP3	0.324717	9.05182	0.101446	0.475819
TIAM1	0.248563	9.02358	0.101531	0.475819
MARCO	0.244365	9.02269	0.101531	0.475819
FOXP3	0.287418	8.48786	0.101533	0.475819
IFNB1	0.284673	8.66486	0.101729	0.475819
OAZ1	-0.388153	10.6118	0.102014	0.475819
NAALAD2	0.257848	8.9236	0.102384	0.475819
GPR160	-0.257478	8.88481	0.102474	0.475819
PBRM1	0.359368	7.95823	0.102655	0.475819
CCR9	0.291303	8.73643	0.102765	0.475819
AIRE	0.286698	8.51928	0.102775	0.475819
NUPR1	0.860564	10.6716	0.102805	0.475819
CCL28	0.262884	8.82513	0.102818	0.475819
LEP	0.280206	8.61885	0.102965	0.475819
POLR2A	-0.352779	9.50956	0.10319	0.475819
CTSH	-0.359829	10.1031	0.103208	0.475819
TGFBR2	-0.261586	9.16432	0.103509	0.475819
BTK	0.279797	8.54911	0.103951	0.475819
KRT14	0.465126	9.6945	0.104203	0.475819
IL6R	0.270685	8.76581	0.104346	0.475819
IL23A	0.247545	8.8946	0.104714	0.475819
HMGA2	0.242933	9.10079	0.105449	0.475819
CCL8	0.319558	8.24351	0.105587	0.475819
FANCC	0.319042	8.24657	0.105587	0.475819
CACNG6	0.297917	8.51234	0.106003	0.475819
CTSG	0.29881	8.44061	0.106735	0.475819
HOXA10	0.295658	8.43808	0.106735	0.475819
BST1	0.259661	8.86355	0.107097	0.475819
CCNB3	0.276903	8.63551	0.107115	0.475819
ZIC2	0.274269	8.63667	0.107115	0.475819
PIK3CG	0.279541	8.54268	0.107187	0.475819
MFNG	0.294156	9.3905	0.107505	0.475819
NCAM1	0.24978	8.89049	0.107688	0.475819
DSC3	0.299384	8.46702	0.108069	0.475819
TREM2	0.263953	8.78431	0.108165	0.475819
FGF14	0.261814	8.78097	0.108165	0.475819
LCP1	0.278355	8.57241	0.108307	0.475819
SH2B2	0.236192	9.07355	0.108325	0.475819
ATG12	0.298067	8.3969	0.108722	0.475819
PLA2G2A	0.246878	8.93514	0.108764	0.475819
FCRL2	0.261646	8.80652	0.10887	0.475819
PUM1	-0.238704	9.00036	0.108931	0.475819
REL	0.241502	8.95836	0.109252	0.475819
COL4A6	0.303813	8.42925	0.110145	0.475819
COL2A1	0.291974	8.52991	0.110521	0.475819
C3AR1	0.291649	8.53252	0.110521	0.475819
S100B	0.28796	8.53252	0.110521	0.475819
ROPN1	0.265984	8.74831	0.110576	0.475819
IL23R	0.260559	8.74581	0.110576	0.475819
NGFR	0.237838	9.04761	0.110899	0.475819
RASAL1	0.234369	9.0698	0.111241	0.475819
NRP1	0.253077	9.27398	0.11138	0.475819
MLANA	0.300089	8.45995	0.111489	0.475819
LTF	-0.387162	9.35871	0.11193	0.475819
L1CAM	0.262849	8.80117	0.112022	0.475819
ITGA8	0.258097	8.79989	0.112022	0.475819
PDGFD	0.256501	8.80041	0.112022	0.475819
MAGEA3	0.290483	9.26552	0.112105	0.475819
RYBP	0.236564	8.95204	0.112285	0.475819
MYD88	0.225442	9.20606	0.112565	0.475819
IL12RB2	0.277419	8.59471	0.112708	0.475819
SF3B1	-0.300424	10.3042	0.112906	0.475819
BRIP1	0.248562	8.85002	0.113298	0.475819
HEY1	0.29873	8.41565	0.113662	0.475819
CARD9	0.291091	8.41653	0.113662	0.475819
FGF7	0.273587	8.62409	0.113709	0.475819
IL22RA2	0.291154	8.52275	0.113956	0.475819
RASGRF2	0.309248	8.3393	0.114308	0.475819
PLAT	0.237296	9.20067	0.114781	0.475819
DUOX1	0.24793	8.92142	0.114926	0.475819
CD55	-0.351033	9.43997	0.114951	0.475819
IGF1	0.289343	8.44973	0.115016	0.475819
IL24	0.237138	8.944	0.115399	0.476315
NKD1	0.284226	8.48277	0.116293	0.478914
JAG1	0.307522	9.62007	0.11686	0.479748
PIK3CD	0.262289	8.73311	0.117162	0.479748
NTF3	0.283054	8.41018	0.117289	0.479748
MS4A1	0.25891	8.76094	0.117899	0.479844
SOCS1	0.270409	8.73579	0.118579	0.479844
CCL14	0.279515	8.54365	0.118628	0.479844
TAL1	0.273442	8.54527	0.118628	0.479844
CTSL	0.293303	9.38113	0.118637	0.479844
TRAF1	0.238748	8.98311	0.119421	0.48194
DKK4	0.245788	8.83615	0.119841	0.482559
CD1B	0.255681	8.81791	0.120586	0.483852
PLA2G5	0.271668	8.60412	0.120696	0.483852
CCR2	0.27458	8.63295	0.121637	0.485313
EPO	0.263767	8.63514	0.121637	0.485313
IL17A	0.308885	8.31799	0.121864	0.485313
TARP_TRGC1_2	0.287928	8.43201	0.1224	0.485465
KRT5	0.311875	9.49321	0.122438	0.485465
NOS2	0.249371	8.83089	0.123245	0.487598
MCAM	0.309634	9.41148	0.123945	0.488373
LAMP1	-0.358464	10.0606	0.12398	0.488373
FOXA2	0.456404	9.53245	0.125087	0.491666
MPO	0.235388	8.94656	0.125643	0.492781
COL6A3	-0.543533	10.074	0.126121	0.493587
CHAD	0.274594	8.5681	0.126757	0.495006
CR1	0.289861	8.34138	0.127394	0.496426
LTK	0.239306	8.89491	0.128257	0.498715
TAP2	0.242133	9.258	0.128888	0.500096
SPANXB1	0.257478	8.90286	0.129846	0.500454
AMER1	0.273644	8.515	0.129902	0.500454
MAPT	0.300912	8.29907	0.129912	0.500454
APOA2	0.242593	8.8171	0.130331	0.500454
LTB	0.219236	9.07224	0.130793	0.500454
IL4	0.271427	8.44754	0.131541	0.500454
MCM7	-0.325791	9.54911	0.132061	0.500454
PAX8	0.253224	8.72954	0.132186	0.500454
ARMH3	0.233935	8.91059	0.132227	0.500454
NFAM1	0.231989	8.91265	0.132227	0.500454
TNFRSF10D	-0.289917	8.37384	0.132429	0.500454
APOB	0.256134	8.77614	0.132581	0.500454
E2F1	0.241896	8.75781	0.132843	0.500454
ELMO1	0.248901	8.78128	0.133453	0.500454
LIG4	0.261279	8.63458	0.133753	0.500454
BLM	0.260768	8.63906	0.133753	0.500454
CD4	0.220843	9.04715	0.13403	0.500454
TNFSF13	0.279132	9.20747	0.134146	0.500454
PDPN	0.216075	9.06919	0.134228	0.500454
CDKN2C	0.237815	8.85805	0.135017	0.502363
PCNA	-0.295361	9.2141	0.135476	0.503037
CACNA1G	0.243607	8.74863	0.136653	0.506106
PRKAR2B	0.248571	8.77201	0.13725	0.506106
IL3RA	0.243849	8.80238	0.137801	0.506106
TXK	0.245657	8.82554	0.138308	0.506106
AMH	0.397911	9.02572	0.138472	0.506106
COL24A1	0.261032	8.65623	0.138509	0.506106
KYAT1	0.239988	8.84859	0.138773	0.506106
NEFL	0.227814	9.00873	0.13894	0.506106
CD7	0.236622	8.87369	0.139197	0.506106
RUNX1	0.221044	9.21298	0.139287	0.506106
LY96	0.240854	8.94737	0.139871	0.506106
EGF	0.272951	8.42821	0.139879	0.506106
ANGPTL4	0.236915	8.92216	0.139933	0.506106
RPTOR	0.212569	8.99102	0.140779	0.507235
C6	0.272605	8.46097	0.141085	0.507235
IFIT2	0.268562	8.46231	0.141085	0.507235
H3C10	-0.473135	10.2009	0.141515	0.507774
FZD1	0.218158	9.05915	0.142101	0.508252
CD6	0.26986	8.49309	0.14221	0.508252
ASXL1	0.247248	8.65252	0.142568	0.508428
UBA7	0.217566	9.2282	0.14282	0.508428
SRD5A2	0.247458	8.99894	0.144241	0.511043
CD9	-0.356583	9.64359	0.144269	0.511043
DUSP5	0.215152	8.98371	0.144527	0.511043
GNAS	-0.323224	10.5606	0.144695	0.511043
CCL4	0.249195	8.58534	0.145131	0.511043
PPP3CA	0.202548	9.09268	0.145247	0.511043
LAG3	0.239536	8.78319	0.145675	0.511558
MME	0.256077	8.61462	0.145968	0.511593
PRF1	0.235266	8.83684	0.146582	0.512754
TNR	0.265841	8.51208	0.147595	0.515121
TET2	0.222101	8.9329	0.147914	0.515121
TPTE	0.249618	8.69876	0.148112	0.515121
SMAD9	0.240797	8.72751	0.148715	0.515419
HSPA6	0.217386	9.04401	0.14882	0.515419
MAP2K1	0.201005	9.1277	0.149051	0.515419
DEFB1	0.325086	9.29436	0.149862	0.517237
GIMAP4	0.2338	8.80322	0.150227	0.51751
NFATC2	0.230601	8.87928	0.151342	0.519377
IFIH1	0.227894	8.87562	0.151342	0.519377
COL5A2	0.21774	8.90046	0.151635	0.519399
SPO11	0.261714	8.50196	0.15206	0.519873
PRL	0.247247	8.71752	0.152954	0.520964
CEP55	0.23729	8.71527	0.152954	0.520964
IER3	0.408899	10.1724	0.153974	0.523455
APOE	0.253588	8.59595	0.154696	0.523941
SNCA	0.246668	8.59497	0.154696	0.523941
PASD1	0.234292	8.84493	0.155152	0.524508
FGF3	0.262689	8.46468	0.15564	0.525114
CD1D	0.244702	8.70833	0.157308	0.525114
GNG7	0.255231	8.52953	0.157591	0.525114
PIN1	0.243727	8.73742	0.157821	0.525114
TLR8	0.242331	8.78846	0.158701	0.525114
TDO2	0.234755	8.79032	0.158701	0.525114
BCL10	0.230646	8.79224	0.158701	0.525114
STAT3	-0.277051	9.60258	0.158789	0.525114
ZBTB16	-0.25777	8.44448	0.158871	0.525114
PPP2R1A	-0.272451	9.70954	0.158885	0.525114
POLE2	0.252392	8.58772	0.159244	0.525114
LAMA3	0.304019	8.0592	0.159916	0.525114
AXL	0.22297	8.88853	0.159936	0.525114
PLA1A	0.220225	8.88725	0.159936	0.525114
PLA2G4E	0.247427	8.61618	0.159968	0.525114
LRRN3	0.245175	8.61664	0.159968	0.525114
IFIT3	0.228497	8.69984	0.161778	0.525863
PTTG2	0.251371	8.71525	0.162042	0.525863
RNLS	0.235619	8.73082	0.16227	0.525863
POU2F2	0.232387	8.73237	0.16227	0.525863
DTX1	0.247761	8.51906	0.162302	0.525863
PRLR	0.235461	8.7594	0.162777	0.525863
FZD6	0.233515	8.78124	0.163105	0.525863
CACNG1	0.252985	8.58074	0.163919	0.525863
SPN	0.22426	8.85729	0.16402	0.525863
LEFTY2	0.26078	8.41445	0.164192	0.525863
MEFV	0.252254	8.41373	0.164192	0.525863
CCNE2	0.220291	8.88143	0.164243	0.525863
SLC7A5	0.212275	8.8819	0.164243	0.525863
SPINK1	-0.62663	12.3692	0.16426	0.525863
CDKN1A	0.210772	8.92816	0.164582	0.525965
ANXA1	0.297657	9.6328	0.165558	0.528152
CD96	0.21287	8.98116	0.165898	0.528308
FGF1	0.238219	8.69394	0.166368	0.528874
ANP32B	-0.258773	9.71139	0.166769	0.529222
CXCR6	0.226708	8.77282	0.167622	0.529395
COL6A6	0.270508	8.21448	0.167677	0.529395
ITGA6	-0.27645	9.52929	0.168299	0.529395
ALDOC	0.242739	8.57204	0.168725	0.529395
IL6	0.240387	8.5703	0.168725	0.529395
PVR	0.212658	8.94671	0.169035	0.529395
RFC3	0.205162	9.03585	0.169093	0.529395
CD74	-0.478378	12.9249	0.169161	0.529395
KLRD1	0.2582	8.43842	0.170287	0.530831
SOD2	-0.395828	10.1601	0.170488	0.530831
BLK	0.243502	8.65916	0.170581	0.530831
CCNO	0.231375	8.71335	0.171523	0.530831
CXCL16	-0.275428	9.32874	0.171662	0.530831
PLCB1	-0.27202	8.20984	0.171873	0.530831
AR	0.223004	8.73964	0.171914	0.530831
TTC30A	0.231905	8.76553	0.172257	0.530831
FEZ1	0.223797	8.76389	0.172257	0.530831
CACNB3	0.211827	8.84233	0.173013	0.531609
MNAT1	0.196681	9.09153	0.173096	0.531609
PGPEP1	0.242171	9.32587	0.173992	0.532246
GPSM3	0.233025	8.61992	0.174915	0.532246
FZD7	0.230538	8.61983	0.174915	0.532246
TNFSF12	0.265696	9.20669	0.175394	0.532246
TMEFF2	0.234439	8.65146	0.175445	0.532246
S100A12	0.24987	8.42704	0.175457	0.532246
LCN2	-1.03371	11.315	0.175861	0.532246
BMP8A	0.235669	8.6781	0.175917	0.532246
ITGB8	-0.217119	9.16548	0.175947	0.532246
SLAMF7	0.234015	9.10088	0.176464	0.53273
CCL5	0.22107	8.73255	0.176696	0.53273
FOXL2	0.282752	8.15717	0.176989	0.53273
CCL22	0.256939	8.31557	0.177441	0.533207
CYP8B1	0.240884	8.55212	0.178739	0.535378
NUMBL	0.235558	9.06698	0.17929	0.535378
PIK3R2	-0.197741	9.01684	0.179496	0.535378
RAG1	0.24092	8.61365	0.179937	0.535378
CCR3	0.23222	8.61258	0.179937	0.535378
EOMES	0.231194	8.61348	0.179937	0.535378
VEGFD	0.224131	8.84354	0.180353	0.535552
TGFB2	0.233765	8.67286	0.180882	0.535552
ITGA9	0.225216	8.67061	0.180882	0.535552
H3C2	-0.3734	9.70434	0.18123	0.535707
C1QBP	-0.344981	9.67025	0.182425	0.536573
TNFRSF8	0.213047	8.94982	0.182646	0.536573
FOXO4	0.212519	8.89979	0.182677	0.536573
GPI	-0.27316	10.0743	0.182707	0.536573
IL5RA	0.240563	8.51141	0.18328	0.536941
POLD1	0.197261	9.03981	0.18366	0.536941
COX5B	-0.337178	10.68	0.183721	0.536941
MNX1	0.287859	9.54757	0.184551	0.538364
NDUFA4L2	0.198012	9.17456	0.18494	0.538364
RPA3	0.256916	8.37758	0.185264	0.538364
FLT1	0.224018	8.86545	0.185749	0.538364
CD34	0.203482	9.07407	0.1864	0.538364
FUBP1	-0.22094	9.27399	0.186574	0.538364
MBNL1	0.260566	9.34612	0.1871	0.538364
CACNA2D3	0.24699	8.44432	0.187143	0.538364
F13A1	0.20896	8.94896	0.187183	0.538364
CSF3R	0.201241	8.96543	0.187284	0.538364
MLLT3	0.209393	8.87029	0.187477	0.538364
GZMA	0.247006	8.47191	0.187948	0.53851
COMP	-0.346577	8.41492	0.188122	0.53851
PMCH	0.237247	8.64758	0.188515	0.538785
CD164	0.322297	10.43	0.190101	0.540495
RAF1	0.192036	9.13029	0.190126	0.540495
ARG1	0.212315	8.94932	0.190428	0.540495
IL32	-0.36993	9.70674	0.190457	0.540495
CGAS	0.218978	8.65511	0.191208	0.540495
TNFAIP3	-0.209803	9.1686	0.191338	0.540495
BNIP3	0.223049	8.68005	0.19153	0.540495
FZD8	0.191917	8.98329	0.191936	0.540495
CRP	0.222206	8.73967	0.192014	0.540495
ITK	0.217454	9.0735	0.1923	0.540495
MSH2	0.204125	8.89122	0.192395	0.540495
APOC3	0.239673	8.94484	0.192891	0.541049
CX3CL1	0.234554	8.46823	0.19352	0.541771
TRIM21	0.197949	9.07165	0.193825	0.541771
PLA2G10	-0.248617	9.19374	0.194045	0.541771
PDGFA	-0.246684	8.95791	0.194539	0.542316
OAS2	0.192908	9.02002	0.196348	0.542716
IL22	0.222383	8.6716	0.196861	0.542716
CD5	0.202123	8.92773	0.197187	0.542716
KLF4	0.431013	9.91147	0.197197	0.542716
FGF22	0.210351	8.72711	0.197271	0.542716
CD1C	0.215758	8.78123	0.197489	0.542716
CCRL2	0.210085	8.781	0.197489	0.542716
RASGRP1	0.212075	8.83451	0.197536	0.542716
MTF1	0.19963	8.83253	0.197536	0.542716
FGF5	0.246496	8.38662	0.197678	0.542716
APOA1	0.23828	8.49136	0.199904	0.547655
KEAP1	-0.281785	8.11422	0.200456	0.547655
PAX5	0.194608	9.03484	0.200959	0.547655
DUSP6	-0.196572	9.07508	0.20159	0.547655
COL4A4	0.22107	8.60609	0.201778	0.547655
TNFSF11	0.226779	8.64088	0.202083	0.547655
NDUFA13	-0.247475	10.6001	0.20217	0.547655
CLEC6A	0.202361	8.89729	0.20244	0.547655
FANCB	0.205835	8.87155	0.202584	0.547655
FLT3LG	0.212407	8.74838	0.202755	0.547655
PTGDR2	0.207692	8.77289	0.202801	0.547655
ATG5	-0.306641	9.05654	0.204034	0.550163
BST2	0.239406	9.42166	0.204671	0.550441
IL13RA1	-0.212472	9.32112	0.204823	0.550441
AKAP1	-0.272174	9.4086	0.205048	0.550441
CCL13	0.2226	8.57158	0.207145	0.55246
ASNS	0.230495	9.48173	0.207395	0.55246
IDH2	-0.209113	9.26291	0.207433	0.55246
APOL6	0.17803	9.16625	0.207753	0.55246
CLECL1	0.225212	8.66063	0.207939	0.55246
SHC4	0.219239	8.7122	0.208189	0.55246
CD86	0.214244	8.74156	0.208239	0.55246
IFNL2	0.211621	8.74179	0.208239	0.55246
TNFRSF1B	0.228642	9.44874	0.210459	0.555162
FLT3	0.238445	8.43606	0.21119	0.555162
PEBP1	-0.227618	10.2716	0.211221	0.555162
LAMP2	0.235059	8.46566	0.211766	0.555162
PFKM	0.231224	8.46742	0.211766	0.555162
POLB	0.195659	9.10617	0.211854	0.555162
ASCL1	0.244891	8.21509	0.212144	0.555162
CDC14A	0.204297	8.88469	0.213035	0.555162
SAMD9	0.205661	8.86378	0.213264	0.555162
LTA	0.199388	8.83389	0.213459	0.555162
JAK3	0.195157	8.83661	0.213459	0.555162
IL2RB	0.190658	8.83608	0.213459	0.555162
FANCE	0.205691	8.80956	0.213619	0.555162
GLI3	0.206275	8.67911	0.213799	0.555162
FANCF	0.209792	8.70847	0.213854	0.555162
CAPN2	-0.239319	10.3435	0.216213	0.559052
PRG2	0.187313	9.01491	0.216278	0.559052
NOD1	0.182885	9.01789	0.216278	0.559052
CREB3L1	-0.253151	10.056	0.217122	0.560132
DNMT3A	0.21266	8.52356	0.218766	0.560132
PTPRC	0.202383	8.82777	0.219034	0.560132
MR1	0.201426	8.82619	0.219034	0.560132
PPP3CB	0.213665	8.55439	0.219069	0.560132
WNT10B	0.202915	8.8018	0.21924	0.560132
FGF2	0.208312	8.77787	0.219408	0.560132
HES5	0.196771	8.77746	0.219408	0.560132
EIF5AL1	0.220717	8.61244	0.219478	0.560132
ICAM4	0.239961	8.31321	0.221798	0.565257
SMO	0.230055	8.38515	0.223233	0.567317
PRKCB	0.229619	8.38363	0.223233	0.567317
MAP3K13	0.19656	8.87124	0.224131	0.56858
AKT1	-0.218458	9.79171	0.224858	0.56858
COL11A2	0.207545	8.77244	0.225212	0.56858
FZD10	0.202838	8.71619	0.225523	0.56858
GMIP	0.201578	8.71466	0.225523	0.56858
DAB2	0.200449	8.68839	0.225612	0.56858
MAPK3	0.219126	9.35524	0.226409	0.569795
ITGB7	0.184005	8.98164	0.227593	0.571982
LAIR2	0.193434	8.93543	0.228583	0.573132
TP53	-0.173561	9.03195	0.228782	0.573132
ENO1	0.18809	8.91202	0.22904	0.573132
RAD51	0.188429	8.88956	0.229471	0.573132
OLR1	0.259826	8.48531	0.229771	0.573132
FGFR4	-0.17996	9.07861	0.230271	0.573132
IFI27	0.325612	10.0963	0.230801	0.573132
CLEC14A	0.201921	8.76363	0.231156	0.573132
VEGFC	0.201413	8.73593	0.231384	0.573132
TNFRSF13C	0.218343	8.50272	0.231428	0.573132
PLA2G4A	0.205408	8.68021	0.231711	0.573132
SPINK5	0.213509	8.62658	0.231847	0.573132
PRDM1	0.190234	9.17223	0.232525	0.574026
CD200	0.195516	9.03144	0.234074	0.577063
BAD	0.17743	9.07679	0.235629	0.577253
OLFML2B	0.198478	8.85827	0.235747	0.577253
MAP2K4	0.194766	9.20177	0.235969	0.577253
FLG	0.203688	8.78131	0.236921	0.577253
DDX43	0.205302	8.70114	0.237764	0.577253
C9	0.226903	8.46364	0.237796	0.577253
ITGA2B	0.219526	8.46594	0.237796	0.577253
GHR	0.209989	8.6453	0.238109	0.577253
TIGIT	0.204139	8.64382	0.238109	0.577253
IL20RB	0.2236	8.52817	0.238157	0.577253
LAMA1	0.209304	8.61614	0.238207	0.577253
STC1	0.215576	8.55949	0.238235	0.577253
WIPF1	0.216736	9.46013	0.238292	0.577253
PRKCE	0.187894	8.92439	0.240151	0.580206
MERTK	0.181437	8.92119	0.240151	0.580206
TMEM140	0.185583	8.89651	0.240713	0.580787
NR4A1	-0.418293	10.1907	0.241438	0.581762
TNFSF14	0.191772	8.82684	0.242235	0.582252
CLEC4A	0.193016	8.77493	0.243095	0.582252
APLNR	0.223032	8.3202	0.243151	0.582252
BMP6	0.201995	8.7218	0.243812	0.582252
BRD2	-0.223124	9.94174	0.244162	0.582252
BCAT1	0.199536	8.66534	0.244364	0.582252
CXCL10	0.196994	8.6657	0.244364	0.582252
SELENOK	0.214902	8.42499	0.244378	0.582252
KLRB1	0.214637	8.48824	0.244769	0.582252
C7	0.212181	8.51784	0.244854	0.582252
TBP	0.171545	9.10663	0.245319	0.582592
MED12	0.167711	9.21021	0.246833	0.58542
RAC2	0.260429	8.18092	0.247312	0.585424
PHGDH	0.183689	8.81608	0.248438	0.585424
ZAP70	0.193653	8.79326	0.248943	0.585424
MLF1	0.193594	8.79016	0.248943	0.585424
ITPK1	-0.182822	8.81823	0.24971	0.585424
MELK	0.172622	9.12078	0.250165	0.585424
CXCL3	-0.251463	9.23035	0.250646	0.585424
CD84	0.222007	8.34655	0.250843	0.585424
IRAK3	0.202589	8.65787	0.250923	0.585424
MYC	-0.243728	9.55407	0.251026	0.585424
COLEC12	0.201968	8.59861	0.251409	0.585424
NOG	0.179514	8.93137	0.251544	0.585424
IL16	0.207568	8.5691	0.251574	0.585424
BCL2A1	0.201664	8.69797	0.251605	0.585424
CCL21	0.201488	8.54405	0.251681	0.585424
TECR	-0.222191	9.32581	0.252254	0.586005
ETS2	-0.297646	9.87932	0.253437	0.588
FLNA	-0.245712	10.0607	0.254855	0.589914
AXIN2	0.247905	9.22528	0.255575	0.589914
TUBB	-0.222764	9.52747	0.256233	0.589914
BRCA1	0.192257	8.73531	0.256381	0.589914
ATRX	-0.177326	8.91304	0.25708	0.589914
IL10	0.199062	8.68113	0.257264	0.589914
PPP2R3A	0.202039	8.64735	0.257642	0.589914
MCL1	-0.236634	10.041	0.258107	0.589914
NFKBIA	-0.244328	9.61367	0.258182	0.589914
TLR1	0.220388	8.33255	0.258231	0.589914
KRAS	0.186989	8.90238	0.258485	0.589914
FGF6	0.205979	8.56062	0.258489	0.589914
CXCL11	0.219034	8.4049	0.258692	0.589914
MS4A6A	0.217338	8.4713	0.25882	0.589914
RAD51C	0.188782	8.87764	0.25922	0.590083
MIF	-0.277687	9.92366	0.259748	0.590545
PTTG1	0.180656	8.82872	0.260615	0.591374
GRIN2A	0.186931	8.80124	0.261273	0.591374
CASP3	0.183404	8.80162	0.261273	0.591374
IRAK1	-0.178272	9.23322	0.261419	0.591374
SYCP1	0.194703	8.77942	0.261902	0.591729
MEN1	0.17128	8.94281	0.263213	0.592499
WNT5B	0.196304	8.70002	0.26359	0.592499
CLCF1	0.179297	8.69868	0.26359	0.592499
GRIN2B	0.204266	8.63957	0.264525	0.592499
SGK1	0.226522	9.51666	0.264689	0.592499
LEPR	0.229691	8.24903	0.265117	0.592499
MS4A2	0.200488	8.55347	0.265578	0.592499
REN	0.197036	8.55434	0.265578	0.592499
TLR7	0.184719	8.8704	0.265664	0.592499
C5	0.203651	8.46124	0.266121	0.592499
PPP2R2C	0.210729	8.43001	0.266167	0.592499
CXCL13	0.208987	8.42919	0.266167	0.592499
HRAS	0.18734	9.1115	0.267224	0.594122
ASL	-0.213574	9.761	0.268574	0.596392
RHOB	-0.264025	9.70205	0.270497	0.599196
TWIST1	0.194064	8.68894	0.270498	0.599196
CD244	0.197386	8.48161	0.273418	0.604171
NCF4	0.205427	8.41612	0.273733	0.604171
ANGPT1	0.21907	8.34689	0.273744	0.604171
CD22	0.17194	8.95247	0.275154	0.606544
AXIN1	-0.183542	9.20189	0.275667	0.606936
CD180	0.186912	8.73624	0.276197	0.607365
TLX1	0.171245	8.90346	0.277102	0.608617
FCER1A	0.177675	8.88102	0.27805	0.609103
FGF11	0.186578	8.62509	0.27879	0.609103
HLA_DQA2	0.204468	8.59722	0.279337	0.609103
ESR1	0.189158	8.59664	0.279337	0.609103
CD46	-0.212926	9.78211	0.279951	0.609103
FGF20	0.200418	8.53937	0.280289	0.609103
IL12A	0.19405	8.50704	0.280685	0.609103
PRMT8	0.179545	8.80818	0.280775	0.609103
CRLF2	0.221655	8.19178	0.280893	0.609103
NEGATIVE_PROBE	0.208651	8.47329	0.281021	0.609103
TWIST2	0.203339	8.47377	0.281021	0.609103
MAPK8IP1	0.176347	9.05932	0.282352	0.611256
TLK2	0.166499	8.92198	0.282804	0.611505
NRDE2	0.181927	8.73193	0.283282	0.611807
ENDOG	0.169799	9.00811	0.285283	0.612864
CDK1	0.185151	8.64477	0.28551	0.612864
PDCD1LG2	0.192078	8.5908	0.286806	0.612864
CHEK1	0.199918	8.52889	0.287919	0.612864
KDR	0.200272	8.50078	0.288397	0.612864
CDC20	0.16886	8.93891	0.288494	0.612864
HGF	0.181028	8.77131	0.288732	0.612864
CACNA1H	0.190739	8.46708	0.288817	0.612864
LILRA3	0.200134	8.47286	0.288924	0.612864
LAMC2	-0.400644	8.93501	0.289192	0.612864
AREG	0.161808	9.21857	0.289206	0.612864
BAMBI	0.200411	8.39974	0.289463	0.612864
NFKBIE	0.167849	8.91624	0.289613	0.612864
CRABP2	0.210704	8.22243	0.289657	0.612864
BMPR1B	0.206864	8.36179	0.289678	0.612864
PRKACB	0.200418	9.34976	0.289731	0.612864
C1R	-0.212177	9.59295	0.289763	0.612864
FGF23	0.215769	8.2929	0.289859	0.612864
MAGEA1	0.194237	9.1873	0.290269	0.613015
GPX1	-0.256027	10.0684	0.290774	0.613367
IFITM2	-0.286069	9.88699	0.293612	0.618179
MLPH	0.219773	10.9067	0.293737	0.618179
SMAP1	0.161797	8.95451	0.29417	0.618372
EWSR1	-0.203649	9.97852	0.295869	0.620691
KBTBD8	0.202696	8.48976	0.296301	0.620691
DKK2	0.198919	8.48781	0.296301	0.620691
BATF3	0.179703	8.74159	0.296974	0.621254
CTAGE1	0.196515	8.42127	0.297256	0.621254
IL22RA1	0.181618	8.68674	0.298874	0.623199
PIK3CA	0.172324	8.68647	0.298874	0.623199
IFI35	0.163772	9.27138	0.300006	0.62484
MAP3K12	0.156501	9.05066	0.301352	0.626922
PRKACA	0.15176	9.207	0.302262	0.628095
KRT19	0.377643	10.8128	0.30336	0.629654
C4BPA	0.193596	8.50939	0.303745	0.629731
PTGER4	0.157154	9.00963	0.304109	0.629766
MBNL3	0.168525	8.87696	0.304914	0.630189
ZEB2	0.149232	9.09015	0.305301	0.630189
IFNL1	0.190699	8.413	0.305543	0.630189
CYP4A11	0.21798	8.03556	0.306127	0.630189
JAML	0.181004	8.67978	0.306536	0.630189
IL17B	0.173813	8.67731	0.306536	0.630189
CLEC7A	0.191658	8.31109	0.306748	0.630189
MAPK12	0.172809	8.65097	0.307527	0.630361
ZNF205	0.172151	8.65161	0.307527	0.630361
RIMKLB	0.184843	8.61854	0.308487	0.630902
CD83	0.180948	8.6196	0.308487	0.630902
C1S	-0.206608	10.144	0.309219	0.631686
ACVR1C	0.167917	8.77732	0.309794	0.632147
PMS2	0.169252	8.75082	0.310971	0.633835
SPA17	0.17768	8.69538	0.313262	0.63696
NLRP3	0.176008	8.69995	0.313262	0.63696
SUV39H2	0.165486	8.84856	0.313559	0.63696
PAK5	0.200405	8.37395	0.314616	0.63737
TNFRSF10C	0.165619	8.82213	0.314869	0.63737
TGFB3	0.16527	8.81941	0.314869	0.63737
MECOM	-0.210127	9.89347	0.315168	0.63737
THBS4	-0.288505	9.08801	0.316032	0.638407
PPP2R2B	0.182231	8.58526	0.317523	0.640703
LAMA5	0.13998	9.17366	0.317905	0.640753
NAT1	0.159932	8.99801	0.318255	0.640753
LRP1	-0.18812	9.48837	0.318942	0.641296
COL3A1	-0.262317	11.5509	0.319233	0.641296
GSK3B	0.160823	8.864	0.319709	0.641328
CD1A	0.169862	8.71612	0.319956	0.641328
AKT3	0.170367	8.66222	0.322382	0.644077
MAPK8IP2	0.169936	8.66412	0.322382	0.644077
PLCB4	0.172388	8.89215	0.322417	0.644077
KIR_FAMILY	0.180439	8.39497	0.322749	0.644077
MAGEA12	0.144511	9.17156	0.324214	0.64443
TFEB	0.151913	8.90479	0.324329	0.64443
NFKBIZ	-0.22018	9.75365	0.324505	0.64443
EZH2	-0.175354	8.5321	0.324561	0.64443
PYCR3	0.171191	8.60648	0.324705	0.64443
WT1	0.20046	8.21615	0.325417	0.64491
CD38	0.169601	9.08148	0.325658	0.64491
COX6B1	-0.226343	10.735	0.326065	0.645011
APH1B	0.162054	8.86016	0.327336	0.64682
RELB	0.23243	8.72387	0.327812	0.647053
P4HA2	0.165974	9.29245	0.328169	0.647053
GATA3	0.16765	8.68097	0.329274	0.647835
ICAM5	0.190807	8.45125	0.329912	0.647835
PIK3CB	0.148447	9.10896	0.32998	0.647835
SH2D1A	0.176	8.8768	0.329995	0.647835
IL1RL2	0.1475	9.00502	0.331275	0.648007
B2M	-0.291306	13.5936	0.331813	0.648007
RBP4	0.154484	8.9821	0.333085	0.648007
CD47	-0.19141	9.5134	0.333147	0.648007
CHUK	0.156776	8.8732	0.333531	0.648007
CTNNB1	-0.22046	10.1088	0.333859	0.648007
IL25	0.173463	8.56763	0.334311	0.648007
MAGEB2	0.166154	8.7272	0.334696	0.648007
FSTL3	0.217337	8.55224	0.335294	0.648007
COL1A1	-0.286769	10.4024	0.335317	0.648007
SELL	0.205649	8.12788	0.335611	0.648007
IL12RB1	0.205445	8.08392	0.33578	0.648007
DTX3	0.1606	8.70251	0.33613	0.648007
GPC4	0.150502	8.9376	0.33633	0.648007
F12	0.183083	8.50674	0.33665	0.648007
ITGAL	0.175961	8.50812	0.33665	0.648007
TBK1	0.160611	8.82744	0.336702	0.648007
PLAUR	-0.17374	8.93908	0.337579	0.648007
CX3CR1	0.187374	8.4743	0.337763	0.648007
TBX21	0.169833	8.80011	0.338277	0.648007
MICA	0.159477	9.23027	0.338413	0.648007
PPBP	0.192325	8.44118	0.338833	0.648007
PRKCG	0.169423	8.64694	0.338943	0.648007
CDKN2D	0.1662	8.64787	0.338943	0.648007
P4HA1	0.145713	9.08086	0.339023	0.648007
FZD2	0.162605	8.77246	0.339844	0.648891
PPARGC1B	0.159136	8.74803	0.341401	0.649491
FCGRT	-0.222857	10.9597	0.341441	0.649491
NID2	0.177139	8.59127	0.34167	0.649491
NOTCH1	-0.164384	8.80014	0.341727	0.649491
DDIT4	0.253273	9.62744	0.341951	0.649491
MAVS	-0.14787	8.95698	0.342599	0.650042
MSH6	-0.176534	8.39469	0.343977	0.651036
CDH5	0.180438	8.52787	0.344291	0.651036
AQP9	0.169777	8.69687	0.34448	0.651036
PTGS2	0.155405	8.81858	0.344736	0.651036
GADD45A	0.188349	8.99452	0.345159	0.651036
SAA1	0.160185	8.6896	0.345989	0.651036
PBX1	0.171763	8.6668	0.345998	0.651036
CDC6	0.170658	8.66577	0.345998	0.651036
FBXW7	0.159299	8.88575	0.347615	0.651553
CXADR	0.154509	8.88399	0.347615	0.651553
NR4A3	0.187926	8.4313	0.347968	0.651553
LILRB1	0.163096	8.76623	0.34807	0.651553
ROR2	0.161565	8.76773	0.34807	0.651553
MAPK14	0.177348	9.61165	0.348529	0.651739
MAP2K6	0.152227	9.03761	0.348952	0.651857
XCL1	0.163078	8.74067	0.349726	0.652367
TFRC	-0.208699	9.84738	0.349945	0.652367
IL1RAP	0.159333	8.7113	0.351373	0.654355
TRAC	0.137575	9.00997	0.352215	0.65525
TNFRSF25	0.144301	8.98556	0.35415	0.657113
MYBL2	0.139429	9.08537	0.354156	0.657113
BTLA	0.163986	8.65937	0.354633	0.657113
WNT7A	0.182803	8.48784	0.354667	0.657113
GBP2	0.150731	8.94803	0.355125	0.65729
ESR2	0.162002	8.75846	0.356466	0.658427
FZD5	0.161396	8.75869	0.356466	0.658427
CSF3	0.175559	8.42595	0.357322	0.659335
CD81	-0.174747	10.3498	0.357971	0.659725
UBB	-0.197214	11.2015	0.358261	0.659725
CXXC4	0.190541	8.35546	0.35981	0.660998
COL11A1	0.171279	8.70749	0.360707	0.660998
TNFSF10	-0.162915	9.3226	0.360788	0.660998
CFP	0.174872	8.54193	0.360961	0.660998
MUTYH	0.163105	8.54235	0.360961	0.660998
CTCFL	0.173729	8.51122	0.362489	0.660998
PDK1	0.154132	9.00184	0.362793	0.660998
CENPF	0.169364	8.65035	0.363454	0.660998
JAG2	0.166413	8.64954	0.363454	0.660998
ATF3	-0.286943	8.98977	0.364576	0.660998
FZD4	0.163367	8.75188	0.365035	0.660998
CD3E	0.154399	8.75211	0.365035	0.660998
SMC1B	0.170645	8.62256	0.365175	0.660998
TLR6	0.16669	8.62094	0.365175	0.660998
WIF1	0.161399	8.6229	0.365175	0.660998
FCGR3A	0.154097	8.62228	0.365175	0.660998
MAF	0.157475	8.83827	0.365216	0.660998
FOXM1	0.152735	8.84584	0.365884	0.660998
PLA2G4C	0.150479	8.84461	0.365884	0.660998
SMAD2	0.159102	8.72421	0.3669	0.662174
FPR3	0.161931	8.70008	0.368761	0.66487
IL17RA	0.156758	8.79652	0.369828	0.666132
JUP	-0.257653	9.76226	0.370785	0.667191
PLA2G6	0.141373	9.03532	0.371741	0.667703
THEM4	0.149568	9.00334	0.372634	0.667703
ARID1A	-0.164012	9.34387	0.372786	0.667703
CIC	0.126938	9.09324	0.373073	0.667703
CST2	-0.159397	8.86919	0.373513	0.667703
MAGEA4	0.195604	9.2115	0.373789	0.667703
NDC1	0.140803	9.01287	0.373925	0.667703
PIK3R1	0.144101	8.92974	0.374387	0.667703
HERC6	0.159587	8.96136	0.37452	0.667703
RASA4	0.154473	9.28791	0.375016	0.667703
SLC1A5	0.163002	9.55926	0.375122	0.667703
MRM2	0.135595	8.90485	0.376534	0.66854
GPX4	-0.154402	9.86052	0.376669	0.66854
IL1RAPL2	0.175875	8.40747	0.376699	0.66854
RIN1	0.226361	9.1279	0.379339	0.671886
TTPA	0.16044	8.66062	0.379697	0.671886
PTCD2	0.160348	8.66418	0.379697	0.671886
DDIT3	0.132149	9.20306	0.380979	0.672771
FCAR	0.158941	8.63186	0.381663	0.672771
SOS2	0.158203	8.63653	0.381663	0.672771
HLA_E	-0.201401	10.429	0.381894	0.672771
MGMT	0.129453	9.00706	0.382092	0.672771
CD40	0.171932	9.37225	0.382425	0.672771
CXCL6	0.161832	8.46234	0.383284	0.673309
ZC3H12A	-0.157771	9.11191	0.383474	0.673309
CCNB1	0.150125	8.7114	0.384789	0.674066
FOLH1	0.168556	8.42641	0.385021	0.674066
HMGN5	0.168192	8.42694	0.385021	0.674066
SERPING1	-0.179195	9.82181	0.385459	0.674181
FGF9	0.149188	8.77944	0.387401	0.676925
BRD7	0.132895	9.02271	0.388032	0.677374
CCL17	0.185544	8.32444	0.390053	0.67894
TPO	0.181712	8.32581	0.390053	0.67894
LAT	0.171509	8.32199	0.390053	0.67894
GOT2	-0.131917	9.11039	0.392159	0.681951
EIF2B4	0.138425	9.24887	0.393846	0.682543
FGFR1	0.132051	9.03925	0.393942	0.682543
GATA2	0.178412	9.32815	0.394003	0.682543
ICAM1	0.133523	8.70221	0.394007	0.682543
IL26	0.173388	8.41959	0.395141	0.68378
TBC1D10B	0.115057	9.15083	0.395475	0.68378
NTRK1	0.157167	8.67693	0.396218	0.68441
NTHL1	0.139549	8.84101	0.39845	0.687611
ADGRE5	-0.170597	9.40318	0.399317	0.688227
TAP1	-0.122264	9.18012	0.399567	0.688227
ID1	0.26296	10.3217	0.400388	0.688987
ENTPD1	0.166019	8.47388	0.401421	0.689612
DUSP2	0.142541	9.00473	0.401512	0.689612
GZMH	0.155599	8.58917	0.402864	0.690211
CCL7	0.203403	7.86952	0.403908	0.690211
HSPB1	-0.256108	11.2655	0.404473	0.690211
SLC39A6	0.133143	9.18657	0.404926	0.690211
ATF1	0.139041	8.86292	0.405005	0.690211
WDR76	0.137281	8.86297	0.405005	0.690211
NFATC4	0.161145	8.56156	0.405079	0.690211
HHEX	0.165683	8.40869	0.405491	0.690211
JAM3	0.145965	8.76727	0.40567	0.690211
C2	0.137596	8.76521	0.40567	0.690211
DST	0.207942	9.53956	0.407138	0.69133
HSD17B8	0.154103	8.52784	0.407292	0.69133
ABCB1	0.143076	8.74244	0.408102	0.69133
CCL16	0.167503	8.33782	0.409484	0.69133
GNAQ	0.166367	8.34343	0.409484	0.69133
ERCC2	0.137622	8.81271	0.410005	0.69133
HLA_DOB	0.137044	8.81235	0.410005	0.69133
EFNA1	0.175994	9.32886	0.410359	0.69133
GADD45G	0.139591	8.71346	0.410546	0.69133
PKP3	0.159847	9.41125	0.410673	0.69133
IGLL1	0.127698	9.04602	0.41085	0.69133
PYCR1	0.121962	9.0257	0.410907	0.69133
STING1	0.118527	9.14997	0.411783	0.692161
CMTM6	-0.142626	8.5728	0.412552	0.692812
SIGLEC8	0.147416	8.6564	0.415467	0.696148
CACNA2D2	0.163383	8.40111	0.416075	0.696148
INHBA	0.159294	8.40029	0.416075	0.696148
C5AR1	0.155256	8.40023	0.416075	0.696148
IRGM	0.157695	8.51744	0.417499	0.6966
HAMP	0.147453	8.51816	0.417499	0.6966
ALKBH3	0.147141	8.51995	0.417499	0.6966
TANK	0.135397	9.28726	0.417901	0.696629
HAVCR2	0.134703	9.07661	0.418318	0.696684
CSF1	0.156163	8.89219	0.419167	0.697456
CASP7	0.115387	9.13145	0.420241	0.698602
CXCL1	0.246208	9.44767	0.422164	0.699844
PPARG	0.167801	8.29946	0.42252	0.699844
ARNT	0.122746	9.05722	0.422813	0.699844
TAB1	0.121665	9.05539	0.422813	0.699844
TREM1	0.149641	8.57156	0.422919	0.699844
EPHA2	-0.202371	9.4979	0.424139	0.700908
RAB7A	-0.163675	10.0913	0.424336	0.700908
ORC6	0.144173	8.6503	0.425382	0.701997
VHL	0.117149	9.09121	0.425862	0.70215
IRF5	0.165767	8.50958	0.427922	0.703118
FGF19	0.153586	8.51212	0.427922	0.703118
LOXL2	0.149503	8.51105	0.427922	0.703118
ETS1	0.116512	9.07171	0.428716	0.703118
GLUL	0.154418	8.47726	0.43043	0.703118
MAP3K8	0.130913	8.92998	0.430794	0.703118
LEF1	0.161709	8.32235	0.43155	0.703118
FPR1	0.139227	8.67266	0.432756	0.703118
PNMA1	0.132238	8.83905	0.432807	0.703118
HLA_DRB5	-0.219676	8.82058	0.433203	0.703118
SERINC2	-0.155131	9.47005	0.433263	0.703118
MIB1	0.12872	8.96776	0.434213	0.703118
GAGE1	0.189798	8.05958	0.434573	0.703118
WNT4	0.158454	8.41329	0.435452	0.703118
CALML5	0.146581	8.64086	0.435494	0.703118
DTX4	-0.128313	8.78462	0.435691	0.703118
FZD3	0.15171	8.53529	0.435907	0.703118
IFNA2	0.147112	8.53438	0.435907	0.703118
CD37	0.150749	9.4376	0.435969	0.703118
C4B	-0.187229	9.42425	0.437129	0.703118
POLR2D	0.123598	8.9471	0.437134	0.703118
CCL19	-0.17041	8.09445	0.437237	0.703118
ID2	0.144985	9.44215	0.437399	0.703118
ITGB1	-0.178771	10.6109	0.437649	0.703118
CTLA4	0.149842	8.38199	0.437961	0.703118
RPS6KA6	0.168238	8.20988	0.438401	0.703118
CCL20	-0.142039	8.654	0.43851	0.703118
MCM4	-0.112336	9.04566	0.43856	0.703118
SREBF1	-0.168229	9.711	0.438744	0.703118
HDAC3	-0.129031	8.63061	0.438835	0.703118
CD99	-0.150927	9.67878	0.439328	0.703118
JADE1	0.132381	8.85587	0.439467	0.703118
ITGAX	0.125196	8.85807	0.439467	0.703118
HMGB1	-0.153373	8.23602	0.439643	0.703118
KIT	0.14387	8.4675	0.441232	0.705037
CCL2	-0.18484	9.56925	0.442709	0.706075
CDKN1C	0.157791	9.12493	0.443859	0.706075
MAD2L2	0.137023	8.73491	0.444356	0.706075
CKLF	-0.128313	9.26604	0.444581	0.706075
CBLC	-0.156508	9.41	0.444988	0.706075
PSMD7	-0.130486	8.8821	0.445213	0.706075
TLR2	0.13624	8.80647	0.445388	0.706075
CD28	0.129591	8.80803	0.445388	0.706075
ATP11C	0.128476	8.80659	0.445388	0.706075
ERCC3	0.120635	9.11613	0.446223	0.706778
FGF21	0.142829	8.52135	0.446612	0.706778
PRKDC	-0.143162	9.46106	0.448108	0.708357
THBD	0.126594	8.7794	0.448392	0.708357
CCL11	0.159783	9.01027	0.450168	0.710544
TXNIP	-0.209319	11.4453	0.452147	0.711511
IRF2	0.124886	8.82531	0.452191	0.711511
PC	0.139296	8.45815	0.452261	0.711511
CFD	0.15874	9.36697	0.452352	0.711511
NDUFA11	-0.143668	9.46515	0.455855	0.71588
CD48	0.142573	8.62398	0.456314	0.71588
IL2	0.137816	8.62584	0.456314	0.71588
CDKN2B	0.155956	8.51557	0.457536	0.717176
MAPKAPK2	-0.14684	9.62225	0.45859	0.718207
IL21	0.151853	8.48154	0.460519	0.719892
TTK	0.158098	8.36187	0.460824	0.719892
TCL1B	0.126619	8.74561	0.4616	0.719892
PTPN5	0.124271	8.74701	0.4616	0.719892
HLA_DMA	-0.158695	9.45266	0.462013	0.719892
PLCE1	0.115933	8.94697	0.462335	0.719892
BIRC5	0.136246	8.56548	0.462447	0.719892
ABL1	0.149068	9.29777	0.463145	0.720359
ATP5F1D	-0.146956	10.3926	0.465802	0.723691
MMP1	-0.306471	9.31974	0.466086	0.723691
TNFSF4	0.141377	8.41964	0.466541	0.723778
CACNA1E	0.145028	8.50684	0.468682	0.726477
ETV1	-0.135794	8.47503	0.469617	0.727304
BCL6B	0.142797	8.47334	0.471836	0.729064
FAS	0.134507	8.74108	0.47196	0.729064
HDAC11	0.131143	8.74175	0.47196	0.729064
KIF2C	0.149728	8.35354	0.47263	0.729477
PRKCA	0.118072	9.1918	0.474689	0.732031
TMUB2	0.110229	9.0194	0.477714	0.735007
SLC2A1	0.110132	9.01903	0.477714	0.735007
MYCT1	0.136222	8.61093	0.477945	0.735007
KLRC1	0.15702	8.27764	0.478776	0.735007
INPP5D	0.109271	8.89593	0.478859	0.735007
PLA2G1B	0.130051	8.75808	0.479053	0.735007
RUNX1T1	0.130152	8.5804	0.481317	0.736594
GDF6	0.127604	8.57852	0.481317	0.736594
LILRA1	0.125408	8.58018	0.481317	0.736594
NT5E	0.123688	8.89001	0.481828	0.736594
STK11	-0.102694	9.09804	0.482119	0.736594
MAPK11	0.123433	8.84628	0.485863	0.741273
ARG2	0.124761	8.7052	0.486	0.741273
MET	-0.122389	9.26153	0.486497	0.741306
MAP3K7	0.139001	9.36802	0.486919	0.741306
IRF3	-0.099949	9.02347	0.487249	0.741306
PBK	0.130612	8.68069	0.489536	0.7434
CTSS	-0.153131	10.0205	0.489656	0.7434
NDUFA6	0.123538	9.41238	0.489856	0.7434
PGM2	0.108388	8.99155	0.490975	0.744475
PVRIG	-0.10671	9.21087	0.493115	0.746747
EGFR	-0.100127	9.10558	0.493603	0.746747
HDAC6	0.117378	9.26303	0.494366	0.746747
NECTIN2	-0.122556	9.25747	0.495277	0.746747
COX6A1	-0.174624	11.2829	0.495527	0.746747
COL17A1	0.130966	8.54361	0.496187	0.746747
NDC80	0.123677	8.83895	0.496234	0.746747
DOCK9	0.121541	8.76935	0.496701	0.746747
ITGAM	0.121245	8.62117	0.496735	0.746747
FOXA1	-0.0977934	9.184	0.496987	0.746747
IRF1	0.135322	8.33036	0.497007	0.746747
CCR5	0.150996	8.19352	0.49788	0.747439
CACNA2D4	0.136688	8.4197	0.498712	0.747449
CACNB4	0.135894	8.42352	0.498712	0.747449
RPLP0	0.149354	8.39609	0.49956	0.747853
PRUNE1	0.137204	8.51119	0.499807	0.747853
HLA_DPA1	0.126137	9.58226	0.501826	0.750255
LCOR	0.132221	8.48307	0.503469	0.750265
ALKBH2	0.118922	8.79062	0.503697	0.750265
TNFRSF11B	0.110798	8.78893	0.503697	0.750265
BRD3	0.141798	8.2601	0.503993	0.750265
BAP1	-0.112751	8.73165	0.504274	0.750265
NF2	0.121664	8.64292	0.504317	0.750265
ROCK1	-0.0949728	9.11	0.505176	0.750926
RELA	-0.118057	9.3105	0.506774	0.752684
HSP90B1	-0.162947	10.3454	0.509376	0.755221
SGK2	0.103309	9.03586	0.509503	0.755221
CDC7	0.141334	8.41487	0.51092	0.755221
S100A9	0.13075	8.18471	0.511086	0.755221
ASPA	0.122715	8.84739	0.511259	0.755221
PRKAR2A	0.100735	9.07428	0.511704	0.755221
SPACA3	0.129992	8.66202	0.511817	0.755221
FGF4	0.123912	8.66402	0.511817	0.755221
PSMB9	0.103112	8.91614	0.512365	0.755318
HDAC2	-0.0896597	9.15984	0.513041	0.755318
SERPINB5	0.129155	8.94649	0.513473	0.755318
MCAT	0.112604	8.84955	0.51355	0.755318
TERT	0.113749	8.70746	0.51527	0.757091
NUF2	0.121986	8.63641	0.515722	0.757091
DKK1	-0.150762	9.15191	0.516183	0.757091
LGALS3	-0.182155	10.7017	0.516426	0.757091
CEACAM1	0.102479	8.93196	0.518849	0.760028
BBC3	-0.120999	8.69564	0.520072	0.761204
MAP3K1	0.111543	9.26457	0.520906	0.761809
PLOD2	0.105185	9.06805	0.521624	0.761827
IFI6	-0.138311	9.56878	0.521759	0.761827
IRAK4	0.136397	8.31423	0.522423	0.762182
WNT16	0.118573	8.65582	0.523254	0.76278
TRAF6	0.10284	9.14003	0.525462	0.765384
EGR2	-0.12868	8.85289	0.526002	0.765554
HOXA9	0.106046	8.70312	0.526572	0.765722
TNFRSF17	0.114149	8.7697	0.527577	0.765722
MSR1	0.13129	8.4626	0.527807	0.765722
MS4A4A	0.131155	8.46238	0.527807	0.765722
TNFRSF10B	-0.121702	9.36542	0.529388	0.767401
TWF1	-0.0983405	9.15197	0.530988	0.76855
ELK1	0.0972048	8.85944	0.531029	0.76855
IFNAR1	0.12592	8.59506	0.531465	0.768567
RAC1	-0.148176	9.90702	0.532178	0.768985
RGMB	0.093101	9.10007	0.533563	0.7701
HDAC10	0.105768	9.0048	0.5338	0.7701
ARID1B	-0.098536	8.89453	0.534933	0.770901
CFI	0.103267	8.835	0.535206	0.770901
TRAF2	0.101804	9.18444	0.535729	0.771042
IL20RA	0.109173	8.87952	0.537702	0.773045
FANCA	0.100631	8.97891	0.537974	0.773045
ISG20	0.147703	8.00758	0.540138	0.775539
CD63	-0.176879	11.1683	0.543611	0.779366
NOTCH3	0.0899849	9.08993	0.543664	0.779366
SHC1	0.108599	9.6892	0.544827	0.780416
TNFRSF12A	-0.194473	9.48917	0.545317	0.780502
IL10RA	0.112564	8.63988	0.546727	0.781901
S100A7	-0.174876	8.82178	0.547275	0.782068
TTR	-0.14742	8.79308	0.547963	0.782106
CXCL9	0.138663	8.18581	0.548165	0.782106
FCN1	0.125963	8.47146	0.548626	0.782148
PTPN11	-0.102955	9.30771	0.550566	0.784297
EPM2AIP1	0.114745	8.61185	0.551159	0.784524
RPS6KA5	0.105693	8.73163	0.552549	0.785794
OPN3	0.0997835	8.95204	0.552918	0.785794
SOX2	0.105761	9.1389	0.554975	0.788099
LRRC32	0.108304	8.49564	0.55681	0.788858
DTX3L	-0.0875132	9.08803	0.556869	0.788858
SETD2	0.0952435	9.15619	0.556912	0.788858
LFNG	-0.133511	9.33644	0.557251	0.788858
GNGT1	-0.118977	8.10055	0.557855	0.789097
FST	0.105296	8.62963	0.558765	0.789203
UTY	0.102574	8.95034	0.559361	0.789203
IRF8	-0.0818603	9.17107	0.559434	0.789203
IKBKE	0.107662	8.7512	0.559672	0.789203
SERINC5	-0.104649	9.93991	0.560893	0.789801
CAMP	0.149905	8.06617	0.561307	0.789801
PITX2	0.119334	8.46731	0.561404	0.789801
HLA_DOA	0.12672	8.17502	0.562296	0.790148
IL11	0.122134	8.2786	0.562541	0.790148
GNG4	0.114067	8.59947	0.563381	0.790148
CD79A	0.148106	9.19235	0.563395	0.790148
HLA_DQB1	0.114112	8.72552	0.564273	0.790157
SYT17	0.0972803	8.72599	0.564273	0.790157
MCM2	0.0934992	8.98543	0.565575	0.791368
AURKB	0.100394	8.94348	0.566509	0.791836
BMP4	-0.114166	8.32034	0.566783	0.791836
ACTB	-0.168944	13.6874	0.56841	0.793497
PML	0.108323	9.43207	0.571327	0.795804
NFATC1	0.104404	8.74332	0.571413	0.795804
PDZK1IP1	-0.16856	9.81602	0.571589	0.795804
PDGFC	0.0936341	8.99787	0.571819	0.795804
SPRY4	0.0929591	8.89755	0.573009	0.795933
TNFRSF10A	0.0870997	8.67113	0.573702	0.795933
HLA_A	-0.160644	12.3465	0.573708	0.795933
PRDX5	0.10398	10.3627	0.573907	0.795933
RANBP2	-0.106631	9.4523	0.574394	0.795933
ITGA1	0.0900172	8.94128	0.574804	0.795933
OAT	-0.10128	9.61034	0.574987	0.795933
UQCR11	-0.0880776	9.2243	0.576995	0.797501
VEGFA	0.157031	10.6647	0.577	0.797501
BLNK	-0.088533	8.88337	0.577525	0.797618
HLA_C	0.117406	11.4018	0.578412	0.798235
TPR	-0.077832	9.11653	0.579667	0.799358
WEE1	-0.0899476	8.84811	0.580823	0.800343
HLA_B	-0.140414	12.3814	0.582874	0.801604
NFIL3	0.103091	8.73895	0.583336	0.801604
MRE11	0.101142	8.73568	0.583336	0.801604
RBX1	0.103344	9.36767	0.583511	0.801604
SKP2	-0.0857614	8.957	0.584081	0.801604
HNF1A	0.0904633	9.16447	0.584408	0.801604
PRKAR1B	-0.0879221	9.11871	0.584835	0.801604
U2AF1	0.0902497	9.89168	0.587214	0.803032
DAXX	0.0871301	8.97011	0.58751	0.803032
LEFTY1	-0.157071	8.78168	0.587625	0.803032
ITGA3	0.106959	9.50485	0.58765	0.803032
TFDP1	-0.0843002	9.23996	0.58991	0.805513
ATP5ME	-0.111358	10.5791	0.59107	0.80649
RRM2	-0.116301	9.34374	0.591891	0.807002
CACNA1C	0.108967	8.55481	0.593537	0.808031
TNKS	0.0991434	8.55555	0.593537	0.808031
PSMB7	-0.0831828	9.09274	0.595525	0.810128
F2RL1	0.0824437	9.1005	0.597345	0.811995
FGFR2	-0.0820106	9.19539	0.598206	0.812254
CCR4	0.102733	8.65789	0.598432	0.812254
NSD3	0.0952822	8.86096	0.600827	0.814526
GOT1	-0.0775645	9.04441	0.601005	0.814526
CDC25C	0.100051	8.74886	0.60252	0.814735
UBE2T	0.0851903	8.94044	0.603711	0.814735
TICAM2	0.10944	8.49075	0.603993	0.814735
IFNAR2	0.0925308	8.79242	0.604306	0.814735
TNFAIP6	0.0921229	8.79389	0.604306	0.814735
ATG7	0.0904615	8.79318	0.604306	0.814735
RIPK3	0.0898404	8.79169	0.604306	0.814735
CARD11	0.0891904	8.67387	0.605782	0.815396
DLL3	0.119778	8.14547	0.606483	0.815396
FGF18	0.0936891	8.54504	0.606588	0.815396
CREBBP	-0.0789138	8.99976	0.606597	0.815396
TCF7	0.0914993	8.72294	0.607734	0.816319
SFRP4	-0.105391	8.99375	0.608755	0.81666
PSEN1	-0.0735112	9.18891	0.608927	0.81666
IFITM1	0.0963673	9.37232	0.60934	0.81666
KRT17	-0.166377	8.99732	0.610504	0.817615
SFRP2	0.099575	8.81078	0.61114	0.817862
DGLUCY	0.0905856	9.30733	0.61349	0.820401
CPSF7	0.0895442	8.89429	0.613973	0.820441
IL33	-0.10913	8.63578	0.614616	0.820695
KRT10	0.0787365	8.97629	0.616323	0.822303
IL6ST	-0.0852343	9.2485	0.616995	0.822303
PSMB8	0.0883446	9.51204	0.617181	0.822303
IGF2R	-0.0822034	9.02223	0.617672	0.822352
TAF3	0.104781	8.53936	0.619853	0.823621
DNMT1	0.0878999	8.71574	0.620208	0.823621
KDM5C	0.0853838	8.71138	0.620208	0.823621
KDM6A	0.0824842	8.91243	0.620443	0.823621
TBXAS1	0.0870247	8.95137	0.621542	0.823878
HCK	0.0909352	8.76112	0.621811	0.823878
ATG10	0.0990946	8.59107	0.622001	0.823878
MBL2	0.102777	8.63938	0.623943	0.825848
PRM1	0.115112	8.1954	0.625593	0.826692
REPS1	-0.0804941	8.69442	0.625733	0.826692
TMEM45B	0.0788221	9.17868	0.62595	0.826692
BAIAP3	0.0839269	8.92988	0.626847	0.827274
MX1	0.0935734	8.77791	0.628725	0.827738
SPRY1	0.103027	8.41961	0.628796	0.827738
CACNG4	0.097426	8.4215	0.628796	0.827738
HIF1A	-0.0792619	9.16662	0.629026	0.827738
RAD52	0.0890576	8.61035	0.629548	0.827824
OTC	0.0883989	8.86359	0.63119	0.827857
CD160	0.102587	8.65675	0.631294	0.827857
TPM4	0.125518	10.9712	0.63143	0.827857
RPS6KB1	0.111329	8.15595	0.631462	0.827857
NDUFS7	0.0874959	9.72097	0.631858	0.827857
ACSF3	0.0835617	9.26342	0.634101	0.830196
FAM124B	0.109211	8.38504	0.634628	0.830286
TCF3	0.075129	9.13085	0.636573	0.832229
SP1	-0.0674345	9.08138	0.637349	0.832598
CEBPA	-0.0859455	9.11422	0.638526	0.832598
NLRC5	0.0746373	8.92172	0.638644	0.832598
LAMB3	0.14254	9.78231	0.638692	0.832598
HLA_DRB4	-0.143299	9.80891	0.640132	0.833862
GAS1	0.104524	8.35422	0.640583	0.833862
XPA	-0.0760446	8.6828	0.642797	0.834586
SKP1	0.0964562	8.59953	0.642801	0.834586
WRN	0.0934499	8.59874	0.642801	0.834586
CCR7	0.102426	8.40904	0.642981	0.834586
CALML6	0.106022	8.24888	0.643961	0.834929
ACVR2A	0.0832991	8.89635	0.644195	0.834929
ABCF1	-0.0712922	9.11655	0.645827	0.834929
IFNA7	0.136518	7.35352	0.646092	0.834929
HLA_DRA	-0.123479	11.0733	0.646134	0.834929
CACNA2D1	0.073002	9.01777	0.646279	0.834929
SFN	0.136286	10.0424	0.64662	0.834929
DUSP10	0.0856387	8.74539	0.646932	0.834929
SERPINH1	-0.0831871	9.25703	0.647813	0.835082
CEBPB	0.0688628	9.15832	0.647972	0.835082
IL15RA	0.0970889	8.37625	0.649065	0.835896
YTHDF2	0.0885326	9.4125	0.650207	0.836772
TRDC	0.0933491	8.67144	0.651583	0.83766
DDB2	0.0772529	8.99559	0.651822	0.83766
NOTCH2	0.0711672	9.03271	0.652313	0.837698
NTRK2	0.0988835	8.48565	0.653087	0.838098
KRT18	0.154989	12.3188	0.653554	0.838103
SAMSN1	0.0925095	8.54227	0.654766	0.838381
CD2	0.0838674	8.80652	0.654767	0.838381
PLD1	-0.0723863	9.14948	0.65641	0.838381
CES3	0.0792544	8.93388	0.656923	0.838381
RICTOR	0.0774916	8.92964	0.656923	0.838381
ICOSLG	0.0762225	8.93476	0.656923	0.838381
ALK	0.0899996	8.39836	0.657403	0.838381
VCAN	-0.0887892	9.58198	0.658028	0.838381
AURKA	-0.0945104	8.12001	0.658984	0.838381
CD3EAP	0.0755729	9.06925	0.659305	0.838381
RBL2	-0.0732948	9.23667	0.659604	0.838381
SSX1	0.137839	11.6168	0.659786	0.838381
SPRY2	0.0763339	9.2515	0.659786	0.838381
DUSP4	0.0804242	8.78207	0.660653	0.838895
SLC25A1	-0.0824538	9.22914	0.662106	0.840152
ITCH	0.0736688	8.90729	0.662693	0.84028
IDH1	-0.111434	9.40136	0.663535	0.84028
ICAM3	0.071882	8.98834	0.663599	0.84028
CASP10	0.0663773	9.16724	0.664663	0.84104
LTBP1	0.0799267	9.3855	0.666864	0.843237
MAP3K14	0.0699116	9.23409	0.668049	0.844145
COL1A2	-0.112081	10.7133	0.669676	0.845069
NOD2	0.0907039	8.58568	0.669906	0.845069
TGFB1	0.0645303	9.112	0.670179	0.845069
RAD50	-0.0765324	8.69539	0.673052	0.847873
CD53	-0.0683006	8.81727	0.673339	0.847873
TOLLIP	-0.0742775	8.67721	0.675487	0.849335
KMT2D	0.0744772	9.31002	0.675588	0.849335
NCOR1	0.0749266	9.29297	0.676004	0.849335
IL12B	0.0964513	8.29215	0.676865	0.849335
VCAM1	0.0931495	8.60619	0.677312	0.849335
IL18RAP	0.0900315	8.60237	0.677312	0.849335
FUT4	0.0790243	8.70145	0.678983	0.850841
HSPA1A	0.0990822	10.1749	0.67963	0.851064
HDAC1	-0.0831117	9.48575	0.680735	0.851272
FUT8	-0.0656955	9.06607	0.680736	0.851272
BMP2	0.0731194	8.9216	0.681253	0.851331
MDM2	0.0756142	9.23518	0.684582	0.854659
PTEN	-0.0833393	9.39302	0.685104	0.854659
FADD	0.0757773	8.67812	0.685331	0.854659
ANKRD28	0.0725578	8.85211	0.687121	0.855716
TFE3	0.0713978	8.89542	0.687344	0.855716
TOP2A	0.0766249	9.01294	0.687595	0.855716
ERBB2	-0.0783266	9.71688	0.689444	0.857427
TNFSF18	0.0867668	8.54678	0.690339	0.857838
KLRG1	0.0843175	8.59621	0.691141	0.857838
RAC3	0.075549	9.06331	0.691194	0.857838
BRCA2	0.0868104	8.28674	0.69235	0.858284
CDH1	0.0877743	9.97236	0.692501	0.858284
WNT2B	0.0666028	9.14032	0.693717	0.859204
BAGE	0.0799375	9.32947	0.696036	0.861487
NSD1	0.0761334	8.51639	0.697063	0.861885
RORA	0.0886067	8.56764	0.697807	0.861885
BNIP3L	0.0825335	8.56852	0.697807	0.861885
GNG12	0.069534	9.14021	0.69826	0.861885
IL17RB	-0.0642255	8.731	0.700777	0.864403
NKX2_1	0.0858843	8.36657	0.702086	0.865371
ACY1	0.0725831	9.2705	0.702517	0.865371
IL17F	0.0766453	8.42823	0.703097	0.865497
PPARGC1A	0.0807251	8.84061	0.704926	0.866425
EXO1	0.0802416	8.58721	0.705163	0.866425
FOSL1	0.0718377	8.73192	0.706115	0.866425
RORC	0.0693154	8.90831	0.70617	0.866425
TLR5	0.0765314	8.77509	0.706241	0.866425
SBNO2	-0.0788414	9.5941	0.70922	0.869491
CD1E	0.0811985	8.51005	0.711577	0.869833
FEN1	0.0582164	8.99938	0.71179	0.869833
TBL1XR1	0.0540982	9.00076	0.71179	0.869833
TNFSF15	0.070606	8.66068	0.712654	0.869833
TYMP	-0.0855819	9.28868	0.712743	0.869833
NR3C1	0.0740116	8.84197	0.712748	0.869833
IL11RA	0.0643715	8.7524	0.71286	0.869833
STAT6	-0.0702748	10.0531	0.714954	0.871802
RAD21	-0.0694519	9.57821	0.716972	0.872741
STMN1	0.0619526	9.05478	0.71724	0.872741
TNFRSF1A	0.0649348	9.61549	0.718011	0.872741
NDUFB4	-0.0656137	10.4071	0.718213	0.872741
LRP6	0.0711487	8.47306	0.718693	0.872741
TCF7L1	0.0775034	8.52912	0.719097	0.872741
FANCG	0.0735293	8.53102	0.719097	0.872741
UQCRQ	-0.0710357	9.57006	0.721129	0.874622
TYK2	0.0704844	9.373	0.721636	0.874651
CYBB	0.0966829	8.20024	0.723083	0.875819
PGF	-0.0641604	8.43063	0.723948	0.875968
EDN1	-0.0704137	8.78684	0.725244	0.875968
JUNB	-0.0991391	10.2761	0.725582	0.875968
SEMG1	0.0818934	8.44443	0.725974	0.875968
P2RY13	0.0728572	8.78784	0.726089	0.875968
PSPH	0.0813983	8.54998	0.726497	0.875968
FOXJ1	0.0715063	8.60103	0.726589	0.875968
IFNGR2	0.0703705	8.7532	0.727884	0.876441
EP300	-0.0539236	8.9564	0.72856	0.876441
PSMB10	0.0670379	9.59167	0.728686	0.876441
EFNA5	-0.06668	8.52948	0.728928	0.876441
HLA_DRB	-0.106943	11.1487	0.7294	0.876441
NDUFB1	-0.0678464	9.78104	0.732129	0.879023
LDHA	0.0826423	8.29131	0.732519	0.879023
ST6GAL1	-0.0600851	9.09394	0.733381	0.879375
GBP1	0.069768	8.57132	0.733783	0.879375
SPOP	0.0572987	9.0999	0.734325	0.879443
SLC16A2	0.0520606	9.0748	0.73666	0.881656
C8B	0.08494	8.12184	0.738891	0.882871
IGFBP3	0.0838337	9.2116	0.739534	0.882871
PARP12	0.0619401	9.11449	0.739908	0.882871
IL1RL1	0.0664598	8.73836	0.739956	0.882871
ARNT2	-0.0587415	8.79122	0.740138	0.882871
CD3G	0.0729777	8.74922	0.740914	0.882871
TIRAP	0.0767723	8.43474	0.741202	0.882871
MAPK1	0.0570399	9.04324	0.741581	0.882871
MAPK10	0.0686734	9.01441	0.74206	0.882871
IRS1	0.0577007	8.80099	0.745953	0.88594
CXXC5	0.057246	8.7991	0.745953	0.88594
JUN	-0.0656558	10.2504	0.746325	0.88594
CDK4	-0.0511424	9.09821	0.746595	0.88594
RHOA	-0.0724331	9.7456	0.74804	0.886146
MAP3K20	0.0605345	9.06238	0.748161	0.886146
EYA1	0.0710375	8.56301	0.748378	0.886146
MXI1	-0.0721698	8.22549	0.748919	0.886146
ADH1A	-0.11284	10.8343	0.749214	0.886146
NBN	0.0542231	8.94262	0.749928	0.886412
IL18	-0.0508027	8.90949	0.751341	0.887183
APC	0.0602673	8.85861	0.75156	0.887183
IFI16	0.0590588	8.81789	0.752328	0.887512
NFE2L2	0.0656069	9.84467	0.753298	0.888078
GRB7	-0.0676066	8.58828	0.755498	0.890093
CDK2	0.0699391	8.42318	0.756644	0.89055
UBE2C	-0.0748224	9.38384	0.7574	0.89055
SMC1A	0.0529241	9.21073	0.757836	0.89055
TNN	0.0537903	8.83481	0.758622	0.89055
HLA_F	0.0628511	11.1686	0.758699	0.89055
NFATC3	0.0564599	9.16177	0.759308	0.89055
TRAF7	-0.0688884	9.38376	0.759327	0.89055
PCK2	0.0547295	9.01447	0.760696	0.891579
TNFRSF11A	-0.0502154	9.02028	0.761232	0.89163
HMGA1	0.0963617	10.072	0.763309	0.893029
HDAC5	0.0560556	8.89751	0.76383	0.893029
LRP5	-0.0581688	9.35749	0.763905	0.893029
PIK3R3	-0.0564678	8.39854	0.765105	0.893856
BIRC3	-0.0518857	8.72631	0.767713	0.896046
GLS	-0.0637462	8.61766	0.768388	0.896046
CDC14B	0.0553369	9.03281	0.768568	0.896046
PFKFB3	0.0386575	9.11582	0.76955	0.896046
A2M	-0.0721163	10.1854	0.769826	0.896046
MAPK8	0.0534472	9.21805	0.769947	0.896046
CD33	0.0567733	8.99803	0.771072	0.89678
LILRB3	0.074864	8.02266	0.773747	0.899313
PSMB2	0.0571708	8.93	0.775809	0.899996
COL27A1	0.0543521	8.93214	0.775809	0.899996
RB1	0.0592416	8.64892	0.776247	0.899996
NRAS	0.0546548	9.09554	0.776321	0.899996
CD19	0.0566796	8.59668	0.777211	0.900248
GUSB	-0.0443009	9.0268	0.777532	0.900248
SMARCB1	0.0445987	9.17943	0.778924	0.901283
PSMB5	-0.0604489	9.4533	0.780335	0.90234
IL34	0.0599936	8.61596	0.784072	0.906083
CCND3	0.0546974	9.45646	0.786134	0.907887
CD3D	-0.0534711	9.03041	0.788683	0.910251
ETV7	0.0669998	8.28354	0.789883	0.910749
NDUFA1	0.0532251	10.3764	0.79012	0.910749
CBL	0.0597201	8.58929	0.792071	0.912417
MAP3K5	0.0512568	9.14655	0.793642	0.913646
IFNGR1	-0.0463316	9.25652	0.794226	0.913661
GBP4	0.0627402	8.75072	0.794663	0.913661
SMC3	0.0517836	9.2727	0.79633	0.914996
IFNA8	-0.0486322	8.16608	0.798038	0.916105
CCL23	0.0713084	8.24964	0.798758	0.916105
NDUFB10	-0.0499072	9.8966	0.798811	0.916105
NDUFB8	-0.0355371	9.19813	0.800417	0.916381
STAT5B	-0.0519484	8.63458	0.800526	0.916381
GTF3C1	0.0491389	8.95575	0.800569	0.916381
CYLD	0.0490075	8.87293	0.803853	0.91874
TRBC1	0.0471922	9.24339	0.804123	0.91874
RIPK1	-0.0473891	8.61467	0.804151	0.91874
POU5F1	0.0663169	8.48277	0.807232	0.921679
CD274	0.0579444	8.20905	0.807885	0.921843
IHH	0.0511852	9.24903	0.810396	0.924126
PSEN2	0.0557503	8.29791	0.81452	0.928246
NASP	-0.0482924	9.53905	0.815805	0.928629
STAT2	-0.0444782	9.3731	0.815899	0.928629
CD59	-0.0450151	9.079	0.81652	0.928629
MUC1	-0.07969	11.8692	0.816907	0.928629
STAT1	-0.0477408	9.61183	0.819814	0.930768
ADORA2A	0.0728296	8.02625	0.819815	0.930768
HLA_DMB	0.0426609	9.12593	0.82128	0.931511
IGF1R	-0.0430724	8.79163	0.821839	0.931511
PARP9	-0.0332749	9.23056	0.822183	0.931511
SERINC1	0.0438957	9.52765	0.822527	0.931511
BID	0.058061	8.26211	0.823789	0.93208
BLVRA	0.0510144	8.5205	0.82414	0.93208
CUL1	-0.0469516	9.30086	0.824572	0.93208
SYK	-0.0324695	9.0019	0.826175	0.93331
SRP54	0.0409783	9.15563	0.827556	0.933998
CXCL8	0.0383647	8.41152	0.827815	0.933998
ALCAM	0.0411238	9.21177	0.829017	0.934772
CNOT2	-0.0472023	8.46059	0.831055	0.936487
ECSIT	0.0404654	8.95928	0.83268	0.937736
MICB	0.0483284	8.90237	0.834276	0.938382
PPP3CC	0.0545028	8.15986	0.835143	0.938382
ITGAV	0.047281	9.46464	0.835416	0.938382
MAPK9	-0.0415099	9.12987	0.835507	0.938382
THY1	-0.0510863	8.92803	0.835844	0.938382
PYCARD	-0.0481412	9.12871	0.837699	0.939883
MAP2K2	0.0376437	9.97475	0.8398	0.941088
FAP	0.0537321	8.51	0.839833	0.941088
SIN3A	-0.0300524	8.93623	0.840408	0.941088
NDUFA2	0.0372943	9.65537	0.84085	0.941088
BCOR	0.0364984	9.02643	0.841455	0.94115
MST1R	0.0514754	9.70004	0.842265	0.94115
PLCG2	0.0449895	9.03159	0.842633	0.94115
NUP107	0.0397224	8.75034	0.84373	0.94115
LTBR	-0.0438114	10.0106	0.843784	0.94115
CD27	0.0446032	8.58637	0.844289	0.94115
PPL	-0.0391228	8.76547	0.844542	0.94115
LILRA5	-0.0339846	8.13343	0.845773	0.941942
DUSP8	0.0287685	9.20956	0.847361	0.942126
IKBKB	0.0409851	8.90992	0.84841	0.942126
FYN	-0.0241819	8.74426	0.848423	0.942126
GZMK	0.048499	8.28014	0.848685	0.942126
EHHADH	0.0372518	9.09471	0.849709	0.942126
NFKB1	0.0375108	9.26952	0.84993	0.942126
HDC	0.0456901	8.81015	0.85201	0.942126
E2F3	-0.0501536	8.33978	0.852168	0.942126
LIF	-0.0549184	8.8333	0.852302	0.942126
TLR3	0.0432979	8.55119	0.853223	0.942126
PMAIP1	0.0553068	8.1513	0.853257	0.942126
IL1A	0.0471154	8.36558	0.853684	0.942126
TGFBR1	0.0411411	8.92801	0.854008	0.942126
COL4A3	0.0554092	8.1474	0.8541	0.942126
EIF2AK2	0.0359827	9.10763	0.854875	0.942126
TNFRSF14	-0.0369536	9.33077	0.854917	0.942126
CCND1	0.0391354	9.78219	0.856004	0.942126
ITGB6	-0.0449288	9.64606	0.856086	0.942126
CLEC4C	0.0482613	8.30774	0.856126	0.942126
PURA	-0.033777	8.31818	0.856613	0.942126
LGR5	-0.0338972	8.42471	0.856856	0.942126
E2F5	0.0513407	8.4501	0.858224	0.942279
FLNC	0.0439824	8.74059	0.858265	0.942279
ACTA2	-0.0391788	10.3902	0.858556	0.942279
MSRB2	0.0321173	8.9442	0.859538	0.942786
NDUFB7	-0.0333521	11.1804	0.861052	0.943346
EIF4EBP1	-0.0317488	8.31774	0.861302	0.943346
TAPBPL	0.0378599	8.80504	0.86161	0.943346
IRF9	-0.0289609	8.90879	0.862267	0.943495
CDKN1B	-0.0249313	9.18049	0.863829	0.944502
ARID2	0.0359149	9.26374	0.86423	0.944502
GNA11	0.0309952	9.34234	0.865266	0.945065
PPP2CB	-0.0277231	9.22252	0.866585	0.945935
TMPRSS2	0.0505936	10.1692	0.869812	0.948886
PMEL	0.0511457	8.49447	0.871738	0.950415
CMTM4	0.0364321	9.06906	0.872276	0.95043
IL2RG	0.0340192	9.36572	0.8733	0.950973
KMT2C	-0.0262129	9.05399	0.874163	0.951341
DNAJC14	-0.0292479	8.77844	0.875087	0.951578
RNF43	0.0337009	8.68613	0.875791	0.951578
PIAS4	0.0327331	8.79593	0.875956	0.951578
NF1	0.0336239	9.04532	0.878182	0.953002
IL7R	0.0482383	8.51552	0.878318	0.953002
ADAM12	0.0539526	8.16587	0.879355	0.953555
FGF16	-0.037416	8.18339	0.880122	0.953817
PRKX	0.0446202	8.58973	0.881712	0.95477
NECTIN1	0.0299886	9.37627	0.882323	0.95477
TOX	-0.0383369	8.48959	0.882582	0.95477
HLA_DRB3	0.0402337	10.4409	0.883358	0.955039
AMBP	0.0376289	8.40408	0.884445	0.955644
SMAD3	0.0316033	8.98631	0.889167	0.959602
ATR	0.0282789	8.98821	0.889167	0.959602
BMI1	0.0266119	8.7875	0.890424	0.960385
ITGB2	0.0281459	8.94835	0.892186	0.96119
IL27	0.0387808	8.34371	0.892231	0.96119
SOCS3	-0.0387826	8.95441	0.892938	0.96138
NFKB2	0.0248016	9.31072	0.897669	0.965901
PHF6	0.0321739	8.82643	0.901683	0.969644
GRB2	0.0161607	8.98214	0.9027	0.970162
HSD11B1	-0.0363668	8.16591	0.904608	0.971333
ERO1A	-0.0256278	9.54787	0.904862	0.971333
KITLG	0.0353478	8.54927	0.907069	0.972824
FBP1	-0.0197616	9.04691	0.907324	0.972824
CXCL12	0.0358984	8.41679	0.907933	0.972856
CCND2	0.0247209	8.7359	0.908428	0.972856
CSF2RB	0.0304493	8.6213	0.909603	0.972986
CDH11	0.0317313	8.80083	0.910608	0.972986
DDX58	0.0396333	8.49838	0.910698	0.972986
CHEK2	0.0385035	8.49585	0.910698	0.972986
DSP	-0.0272189	10.2559	0.911416	0.97318
TRAF3	-0.0292212	8.68957	0.911999	0.973228
MYB	-0.0286262	8.60334	0.914267	0.975075
ATM	-0.0180868	9.07537	0.915037	0.975322
TYMS	0.0237947	9.10413	0.915779	0.975539
ITGA2	-0.0296754	9.13685	0.917438	0.976732
SHC2	-0.026772	8.87967	0.918088	0.97685
CD68	0.0295295	9.92058	0.919177	0.977302
LYN	0.0256342	9.07882	0.919591	0.977302
FGFR3	-0.0222374	8.98524	0.922017	0.979077
CCNA1	0.0316401	8.32607	0.922343	0.979077
CD276	0.0153283	9.12992	0.92299	0.979191
ETV4	-0.0262872	8.78282	0.925001	0.98075
TACSTD2	-0.0165312	8.92013	0.926146	0.98121
CD40LG	0.0356841	8.25945	0.926518	0.98121
VEGFB	-0.0181735	9.02671	0.927176	0.981333
MDM4	0.0214809	9.39267	0.928029	0.981663
APOM	-0.014891	8.14757	0.929512	0.982643
HES1	0.0245725	9.52846	0.93004	0.982643
EFNA2	0.00526879	8.85356	0.931532	0.982881
STAG2	0.0207229	9.34933	0.931722	0.982881
COL5A1	0.0185854	10.1306	0.931893	0.982881
IL15	0.0299251	8.29015	0.933313	0.983806
H2AX	-0.0211807	8.87136	0.937087	0.98721
ME2	0.0198458	9.22126	0.940156	0.989447
NDUFA3	-0.0187387	10.2649	0.940302	0.989447
FANCL	0.0274783	9.05379	0.941258	0.989877
CASP8	0.0225924	9.22042	0.942028	0.990113
SFXN1	0.0237157	9.01659	0.944999	0.992447
ATG16L1	0.022706	8.80232	0.945344	0.992447
CCR6	0.0218001	8.33945	0.946489	0.993073
TXN2	0.0169509	9.56757	0.947366	0.993418
IL9	0.0270634	8.185	0.949447	0.995025
KRT7	-0.0268135	10.1157	0.951217	0.99629
ICOS	0.0198909	8.36568	0.952881	0.99629
ACVR1B	0.0213676	9.30888	0.953205	0.99629
NSD2	0.0197898	8.9941	0.953758	0.99629
SLC16A1	-0.0178689	9.68069	0.953847	0.99629
CREB3L4	0.0254039	8.12535	0.954524	0.99629
LRP2	-0.0120476	8.13078	0.954822	0.99629
JAK1	0.0155934	9.75011	0.955053	0.99629
BBS1	0.0225355	8.6008	0.956937	0.997681
GLUD1	-0.018266	8.64588	0.957854	0.997773
API5	-0.014938	9.41224	0.958126	0.997773
PSMC4	-0.0151514	9.07856	0.959783	0.998426
PDGFRB	0.00917157	9.11342	0.960195	0.998426
RFC4	0.022519	8.46877	0.960406	0.998426
CD58	0.0125852	8.9716	0.962669	1
TAPBP	0.00724949	9.1759	0.965434	1
SPRED1	0.0204214	8.87545	0.966103	1
CXCL2	-0.0208831	9.73978	0.968399	1
PPP3R1	0.0149259	9.09012	0.968778	1
NDUFA7	-0.0139325	9.62493	0.969655	1
ATF2	0.0127015	9.41186	0.969792	1
GTF2H3	-0.00804383	8.86184	0.970939	1
SOS1	0.0204835	8.59105	0.972966	1
HPRT1	0.0188199	8.65787	0.973684	1
GABPA	0.0225154	8.72457	0.974348	1
CD69	0.0149595	8.78682	0.97555	1
MMP11	0.00159888	8.78705	0.975576	1
PRR5	-0.00169806	8.84709	0.975629	1
HDAC4	0.0184112	8.9069	0.976077	1
IL18R1	0.0235395	8.61022	0.978533	1
ITGB4	0.00763022	9.97885	0.980525	1
CXCR4	-0.00909045	9.10518	0.98234	1
ZEB1	0.0201523	8.5584	0.983565	1
CCNE1	0.0198102	8.76316	0.984803	1
FCGR1A	0.0145804	8.88654	0.985488	1
CASP1	-0.0182404	8.8723	0.985539	1
PARP4	-0.00692778	9.56644	0.985701	1
DUSP1	-0.0083093	9.7969	0.985958	1
FLNB	0.00919848	9.6658	0.987349	1
CD209	0.0231147	8.34496	0.988078	1
MRPL19	0.00935747	9.28683	0.988132	1
NDUFB11	-0.00373527	9.38986	0.988572	1
IRAK2	-0.00136482	8.84323	0.99015	1
E2F4	-0.00414404	9.59188	0.990316	1
ANLN	-0.00315514	8.9118	0.991513	1
NDUFA12	-0.00624653	9.61634	0.991568	1
SIGIRR	-0.00739827	9.2206	0.993262	1
OAS3	-0.00426771	8.57178	0.994627	1
HELLS	0.0157751	8.62526	0.99994	1
CREB1	0.0147981	8.39493	0.999943	1
LAMP3	0.0239374	8.15593	1	1
LDHB	0.0124919	8.92964	1	1
RASGRP2	0.012026	7.90394	1	1
MTF2	-0.0115712	8.42875	1	1
UQCR10	0.0113707	8.71086	1	1
PRC1	0.0104641	8.90378	1	1
PDGFB	0.0103121	8.46888	1	1
USP9Y	0.0080116	8.07307	1	1
LILRB2	-0.00789802	8.38115	1	1
ADH6	0.00771886	8.37598	1	1
MKI67	0.00553096	8.91631	1	1
LILRB4	-0.00486918	8.08798	1	1
CYFIP2	0.00447377	8.69316	1	1
MCM5	-0.00406989	9.28213	1	1
SMAD4	0.00379391	9.03381	1	1
TNFRSF18	0.00318567	8.63624	1	1
ULBP2	0.00312378	8.51087	1	1
IL4R	-0.00295936	9.4764	1	1
DEPTOR	0.00288419	9.29595	1	1
PYCR2	0.00238601	8.5786	1	1
SERINC3	-0.00177836	9.43655	1	1
SF3A1	-0.00147271	9.41527	1	1
ATOX1	0.00133021	9.24796	1	1
CDC25B	-0.00120352	9.48857	1	1
JAK2	0.00114629	8.95699	1	1
BCL6	-0.000888483	8.76353	1	1
RIPK2	0.000800917	8.47611	1	1
FH	-0.000793799	9.19521	1	1
POLR1B	0.000790424	8.27321	1	1
SMAD5	0.000675823	9.04823	1	1
CD163	-0.0003313	8.86102	1	1
POLR2H	0.000250664	9.16379	1	1
PLK1	-0.000164229	8.94385	1	1
