# Supplementary material
Source: HighWire-hosted journal article supplement (https://gut.bmj.com/content/gutjnl-2024-334589)
Supplement: inline-supplementary-material-7 [file inline-supplementary-material-7.xlsx]

## Sheet: Sheet1
Supplementary table 6 Differential gene expression table SRC vs IC
	logFC	logCPM	PValue	FDR
CXCL14	1.40581	8.767	5.6151e-25	1.01746e-21
HPGD	0.85841	8.67132	3.48927e-10	3.16128e-07
IL1R2	1.12423	9.06634	5.2356e-10	3.1623e-07
HHIP	0.655058	8.58352	1.44099e-06	0.00065277
SFRP2	-1.48455	10.0848	4.86621e-06	0.00176352
APOA4	0.764525	8.83908	7.06896e-06	0.00213483
THBS4	-1.6302	10.268	8.93518e-06	0.00231293
FN1	-1.24052	10.1926	1.83108e-05	0.00414739
C3	-1.2136	10.5521	2.52468e-05	0.00508303
CD44	-1.24457	10.0983	3.6672e-05	0.00664497
CCL11	0.571698	8.69251	5.73622e-05	0.00944912
THY1	-0.673608	9.42792	7.711e-05	0.0109014
SLAMF7	0.488452	8.87723	7.82111e-05	0.0109014
OASL	0.500746	8.82328	9.98335e-05	0.012043
COL6A3	-1.02621	10.5751	0.000104328	0.012043
THBS1	-1.08265	10.3429	0.00010634	0.012043
IL1RN	0.467805	8.98694	0.00012786	0.0136284
PDGFRA	0.456946	8.96392	0.000162175	0.0163256
CD9	-0.856178	10.1173	0.000191814	0.018293
COL1A2	-1.00697	11.4827	0.000204396	0.0185183
GPT	0.65037	9.62947	0.000296893	0.0256176
COL3A1	-0.960366	12.1927	0.000369634	0.0304444
EGR1	-1.12436	10.3425	0.000437586	0.0331052
CD36	0.427336	9.16702	0.000438479	0.0331052
LY6E	-0.871691	9.84467	0.00049178	0.0345281
PDPN	0.443124	8.86749	0.000495437	0.0345281
CCL28	0.478232	8.62551	0.000524102	0.0351731
APOC2	0.420756	8.98018	0.000617137	0.0399376
CREB3L3	0.46552	8.62463	0.000678895	0.0424193
C7	-0.902673	9.33874	0.000806356	0.0483038
PLAU	0.474877	8.54996	0.000826389	0.0483038
PDGFD	0.457253	8.60973	0.00106734	0.0604379
SFRP4	-0.844276	9.60602	0.00114076	0.0626379
COL1A1	-0.985725	11.0412	0.00123849	0.0660041
CD24	-1.44552	12.2051	0.00131716	0.0681915
LY9	0.38409	8.98148	0.00155785	0.0784119
PRDM1	0.383277	8.99913	0.00179342	0.0878291
SERPINA1	-2.15101	10.6552	0.00186056	0.0887193
AKR1C4	0.41641	8.70073	0.00226909	0.105425
MAGEC2	0.369086	8.91154	0.00301884	0.132061
ENG	0.355882	8.99974	0.00305864	0.132061
IL1B	0.36601	8.96442	0.00306103	0.132061
PLA2G4F	0.362985	8.95798	0.00332933	0.140008
MMP3	0.41346	8.92631	0.00341745	0.140008
CTSW	0.379193	8.83409	0.00347701	0.140008
PECAM1	0.350508	8.9697	0.00388169	0.152905
DEFB1	0.39568	9.18212	0.00417495	0.160958
DLL1	0.360534	8.88567	0.00434288	0.163944
ITGB3	0.364147	8.84166	0.00445129	0.164607
PTGDR2	0.398104	8.59933	0.00476775	0.170112
PDK1	0.36335	8.82022	0.00478792	0.170112
DMBT1	-1.56455	9.81028	0.0052167	0.181782
SOX11	0.389062	8.5836	0.00534974	0.182901
POU2AF1	0.468198	8.98691	0.00597585	0.200523
LOXL2	0.4372	8.28775	0.00633866	0.20883
HK2	0.394938	8.50714	0.00666604	0.215694
BMP6	0.382882	8.55613	0.00718515	0.223086
TPM1	-0.702561	10.8685	0.00720944	0.223086
RASGRF1	0.350664	8.8317	0.00726385	0.223086
MFGE8	0.332524	8.98107	0.00741276	0.223865
KLRF1	0.412645	8.36101	0.00784399	0.233005
GZMB	0.362055	8.66087	0.00800738	0.234022
PKM	-0.56332	10.5568	0.00819103	0.23559
GADL1	0.362293	8.68759	0.00840235	0.235687
MAPK3	0.330239	9.2331	0.00852003	0.235687
TNFRSF13B	0.374929	8.95703	0.00894504	0.235687
PASD1	0.36066	8.70767	0.00901918	0.235687
KRT1	0.3272	8.94542	0.00905112	0.235687
SELP	0.383486	8.84033	0.00911486	0.235687
CD8B	0.31993	9.03	0.00932235	0.235687
MASP1	0.330599	8.8315	0.00936095	0.235687
SH2D1B	0.343031	8.77602	0.00936504	0.235687
RPS27A	-0.548588	11.2747	0.00985792	0.244693
DUOX1	0.333752	8.81063	0.0100753	0.246709
CEACAM6	-1.42971	10.6449	0.0103417	0.249856
FOS	-1.01749	11.0457	0.0112945	0.267811
CNTFR	0.321223	8.91398	0.0113805	0.267811
LGALS9	0.392351	9.78868	0.0118033	0.2742
MMP7	-1.33521	9.57577	0.012292	0.281059
EPCAM	-0.619108	10.6527	0.0126938	0.281059
DUSP5	0.336699	8.85832	0.0129909	0.281059
NCAM1	0.328988	8.78597	0.0131442	0.281059
FGF10	0.312074	8.97055	0.0131535	0.281059
ACOT12	0.317373	8.85032	0.0134322	0.281059
APP	-0.635596	9.90248	0.0134831	0.281059
NOS1	0.312922	8.88152	0.0135548	0.281059
FLNA	-0.62945	10.4213	0.0136632	0.281059
SGK2	0.319876	8.85998	0.0138287	0.281059
CCL24	0.341181	8.65262	0.0139106	0.281059
RPL23	-0.697518	12.5914	0.0141239	0.281059
CCNA2	0.338323	9.30578	0.0142119	0.281059
P4HA2	0.300371	9.16372	0.0142701	0.281059
KAT2B	0.354906	8.50526	0.0145232	0.282967
TUBB	-0.478389	9.77294	0.0152445	0.292587
ID4	0.348447	8.5536	0.0153525	0.292587
CACNG6	0.367809	8.40617	0.0155013	0.292587
SHC3	0.308128	8.85671	0.0157526	0.294212
TPTE	0.339107	8.58551	0.016024	0.294212
WNT4	0.397566	8.21885	0.0160745	0.294212
MCAM	0.347457	9.32297	0.0162372	0.294219
LRP1	-0.379134	9.67377	0.0164708	0.295345
MPPED1	0.324441	9.0188	0.0167043	0.295345
SSX4	0.318295	9.21696	0.0167971	0.295345
HDC	0.338961	8.58744	0.0169845	0.295345
FGF13	0.304045	8.8817	0.0171144	0.295345
WNT5A	0.370344	8.3344	0.0173608	0.296772
MMRN2	0.340449	8.59838	0.017549	0.297185
RRAS2	0.316869	8.7821	0.0181052	0.301442
TNFSF8	0.296306	8.92801	0.0181331	0.301442
GNLY	0.331554	8.94217	0.0183498	0.301553
IFIT1	0.313467	8.773	0.018556	0.301553
PLA2G3	0.32761	8.67388	0.019047	0.301553
MEF2C	0.313714	8.81283	0.0191703	0.301553
MYCN	0.285195	9.01661	0.0191759	0.301553
CD207	0.313082	8.74179	0.0194144	0.301553
IL3RA	0.319196	8.69981	0.019725	0.301553
WNT3	0.310469	8.80229	0.020183	0.301553
ITGA8	0.312662	8.70941	0.0203118	0.301553
LILRB3	0.443751	7.76285	0.0209559	0.301553
NODAL	0.316662	8.64049	0.021042	0.301553
COL24A1	0.328395	8.55748	0.0210659	0.301553
SIRT4	0.306332	8.81847	0.0213093	0.301553
TREM2	0.320108	8.69507	0.0213438	0.301553
SIGLEC1	0.303714	8.83439	0.0213579	0.301553
SPO11	0.35394	8.38773	0.0214397	0.301553
CLEC4E	0.326499	8.61544	0.0214578	0.301553
MYC	-0.409791	9.73139	0.0214737	0.301553
MAGEC1	0.279047	9.06927	0.0215666	0.301553
LILRA4	0.369124	8.61422	0.0216748	0.301553
VTCN1	0.290855	9.21481	0.021682	0.301553
SELPLG	0.30281	8.82918	0.0218849	0.301553
PRKAA2	0.296308	8.86087	0.0219674	0.301553
CR2	0.345844	8.41994	0.0224153	0.305387
C6	0.350864	8.3561	0.0231426	0.312714
CCR1	0.329334	8.52201	0.0232983	0.312714
LTK	0.298854	8.80583	0.0235472	0.313732
IFNG	0.310609	8.72503	0.0244981	0.318181
IRF4	0.356176	8.3598	0.024593	0.318181
DEPTOR	0.345349	9.04701	0.024781	0.318181
ADGRE1	0.290551	8.85576	0.0248645	0.318181
CD99	-0.369875	9.88044	0.0249415	0.318181
IFNB1	0.323167	8.58187	0.0250682	0.318181
IL20RA	0.303366	8.71639	0.0251103	0.318181
ITGA9	0.324083	8.55691	0.0255757	0.321828
SPN	0.299621	8.75988	0.025919	0.323899
FGF2	0.303718	8.66659	0.0262273	0.325505
SRD5A2	0.277815	8.92681	0.0267777	0.330077
KLRK1	0.29718	8.7467	0.0272236	0.333305
CDH5	0.334438	8.38544	0.0279439	0.336866
H3_3A	-0.587474	11.2388	0.0279502	0.336866
OAZ1	-0.473359	10.754	0.0280722	0.336866
WNT10A	0.286872	8.92621	0.0282942	0.337297
OTOA	0.283028	8.90221	0.0294682	0.341703
BAG1	0.284037	8.85456	0.0294925	0.341703
H3C8	-0.596745	9.556	0.02992	0.341703
FASLG	0.299869	8.71478	0.0300385	0.341703
FGF12	0.272764	8.89292	0.0301828	0.341703
LRRN3	0.320251	8.5147	0.0306597	0.341703
CLEC6A	0.291012	8.79281	0.0309379	0.341703
ARG1	0.279798	8.85709	0.0309447	0.341703
MCL1	-0.496035	10.2959	0.0315734	0.341703
CDK6	-0.58341	9.275	0.0316307	0.341703
RASGRP1	0.290855	8.73537	0.0316349	0.341703
SNAI2	0.273992	8.88028	0.0316652	0.341703
CCNE2	0.289495	8.78632	0.0317004	0.341703
LIG4	0.314136	8.54548	0.0317018	0.341703
PLA1A	0.28183	8.79996	0.0317092	0.341703
AQP9	0.307576	8.56393	0.0318148	0.341703
CCNO	0.300648	8.61903	0.0320952	0.341703
MCM7	-0.410547	9.6765	0.0321288	0.341703
BAX	-0.426281	9.67085	0.0324052	0.341703
COL6A6	0.367104	8.1002	0.0325628	0.341703
CCNB3	0.313294	8.55505	0.032624	0.341703
ANGPT1	0.349891	8.21454	0.0331707	0.345433
ADH4	0.293564	8.72822	0.0340782	0.352285
CTSH	-0.419149	10.2178	0.0350376	0.352285
IFI35	0.255141	9.17439	0.0351122	0.352285
LAMB4	0.337063	8.32192	0.0354548	0.352285
C2	0.299891	8.62559	0.0356038	0.352285
BMP7	0.375967	8.02261	0.0356744	0.352285
NKX3_1	0.276787	8.79585	0.0357861	0.352285
SIGLEC5	0.294563	8.71369	0.0357919	0.352285
S100A7	0.307737	8.50042	0.0359624	0.352285
IRAK1	-0.345334	9.39541	0.0362283	0.352285
CD300A	0.252731	9.05283	0.03627	0.352285
IL13RA2	0.340672	8.23009	0.0365061	0.352285
NANOG	0.247558	9.18536	0.0366239	0.352285
MAP2K4	0.251571	9.12132	0.0367938	0.352285
UBA7	0.255037	9.16092	0.0370175	0.352285
H3C10	-0.633371	10.4198	0.0371005	0.352285
NAALAD2	0.270381	8.86272	0.0373652	0.352285
CD80	0.284077	8.69833	0.0375941	0.352285
TP73	0.285532	8.71566	0.037603	0.352285
LIFR	0.406893	8.03065	0.0378811	0.352285
PAX3	0.266852	8.92592	0.0388208	0.352285
MASP2	0.273083	8.88152	0.0390621	0.352285
PLA2G4E	0.293491	8.53358	0.0391192	0.352285
NPM2	0.25811	8.96336	0.0394519	0.352285
IL3	0.289464	8.64774	0.0394553	0.352285
MLPH	0.416691	10.714	0.0395461	0.352285
CD79A	0.41812	8.96853	0.0395988	0.352285
LBP	0.325915	8.32362	0.0397884	0.352285
IL13RA1	-0.331878	9.45267	0.0399121	0.352285
RAG1	0.303149	8.52467	0.0401159	0.352285
MLH1	0.271883	8.84254	0.040147	0.352285
IFITM2	-0.521742	10.1283	0.0401687	0.352285
PTGER4	0.267548	8.89745	0.040794	0.352285
PSAT1	0.254916	8.9664	0.0412283	0.352285
CLEC5A	0.26985	8.78657	0.0413037	0.352285
IL5	0.301545	8.57468	0.0413478	0.352285
IL6R	0.28479	8.70267	0.0414711	0.352285
TRAF1	0.259212	8.921	0.0415685	0.352285
RSAD2	0.261852	8.85913	0.0419561	0.352285
COL2A1	0.300547	8.46566	0.0419891	0.352285
PSMD7	-0.273016	9.01288	0.0420059	0.352285
MMP1	-1.05992	9.99468	0.0421726	0.352285
LAMC3	0.307052	8.5072	0.0421887	0.352285
CD4	0.249171	8.98026	0.0429333	0.355881
FGF14	0.27473	8.72071	0.0434961	0.355881
GRIA3	0.318026	8.36272	0.0436002	0.355881
BRD4	-0.256519	9.15736	0.0436696	0.355881
ITGB7	0.256147	8.89182	0.0436912	0.355881
CD38	0.249284	8.98836	0.0437977	0.355881
MAPK12	0.296999	8.53047	0.0445164	0.355997
CAMK2B	0.294945	8.74066	0.0445966	0.355997
GRIN2A	0.278579	8.697	0.0446076	0.355997
CD7	0.265368	8.80741	0.0452592	0.355997
NCR1	0.278075	8.72296	0.0456214	0.355997
RYBP	0.253923	8.89241	0.0456818	0.355997
NFAM1	0.260748	8.84738	0.0460457	0.355997
NDUFA4L2	0.241044	9.10335	0.0461508	0.355997
IFNA1	0.314241	8.3877	0.0462225	0.355997
DKK4	0.272904	8.76686	0.046535	0.355997
APOB	0.268621	8.71548	0.0467457	0.355997
RHOB	-0.494617	9.93359	0.046791	0.355997
MS4A1	0.271381	8.69873	0.0468002	0.355997
SPINK5	0.29304	8.53025	0.0468605	0.355997
FAM30A	0.278448	8.64316	0.0469112	0.355997
PCNA	-0.418081	9.36512	0.047206	0.355997
SOX10	0.266038	8.80899	0.0473811	0.355997
MAF	0.271586	8.72448	0.0478308	0.355997
LCN2	0.917913	9.96197	0.0483527	0.355997
BCL2L1	-0.331041	9.56374	0.0486076	0.355997
KDR	0.307285	8.38885	0.0487882	0.355997
CD247	0.248923	8.97159	0.0490063	0.355997
TNFRSF17	0.280569	8.62929	0.0492824	0.355997
NRDE2	0.276486	8.62893	0.0492824	0.355997
PTPN5	0.283458	8.60926	0.0493089	0.355997
DGLUCY	0.234787	9.18478	0.049388	0.355997
BST1	0.261635	8.81047	0.0495836	0.355997
CXCL16	-0.333241	9.42357	0.0496981	0.355997
CDKN2C	0.258702	8.79275	0.049706	0.355997
BRIP1	0.257172	8.79417	0.049706	0.355997
ID1	0.561833	10.0485	0.0501104	0.356012
F2RL1	0.248893	8.96513	0.0501549	0.356012
CD48	0.292274	8.4865	0.0504851	0.356012
TIGIT	0.285889	8.54562	0.0505705	0.356012
IL1RAPL2	0.308534	8.28042	0.0506904	0.356012
PPP3R2	0.270709	8.66653	0.0516085	0.357013
FZD2	0.26498	8.66652	0.0516085	0.357013
GPC4	0.258793	8.82803	0.0517206	0.357013
SHC4	0.275782	8.62882	0.0517305	0.357013
DKK1	-0.494977	9.45338	0.0521513	0.357013
CD164	0.380815	10.3204	0.0523905	0.357013
CACNA2D3	0.301436	8.35974	0.0526837	0.357013
KRT6A	0.299569	8.4037	0.0528999	0.357013
IL13	0.302317	8.42603	0.0529822	0.357013
FGF1	0.272164	8.62117	0.0530206	0.357013
ELMO1	0.26744	8.72225	0.053798	0.357013
TCL1A	0.243452	8.99817	0.0540929	0.357013
LAMP2	0.302286	8.37238	0.0541689	0.357013
TSC1	0.269024	8.87737	0.0542269	0.357013
FLT1	0.254979	8.79703	0.0544021	0.357013
MYCT1	0.289558	8.47795	0.05449	0.357013
ITK	0.231136	9.01803	0.0548439	0.357013
CTSL	0.277534	9.33369	0.0551878	0.357013
CD1D	0.26399	8.64295	0.0555438	0.357013
IRGM	0.298273	8.38634	0.0556697	0.357013
LY96	0.243959	8.89428	0.0556873	0.357013
GADD45G	0.2781	8.58648	0.0557631	0.357013
TLR10	0.291369	8.42787	0.0558082	0.357013
CCR3	0.282078	8.52971	0.0558807	0.357013
NKG7	0.252639	8.86303	0.0561061	0.357013
GIMAP4	0.256262	8.73984	0.0561885	0.357013
GIMAP6	0.266928	8.72356	0.0563318	0.357013
CSF2	0.266018	8.87775	0.0563498	0.357013
C9	0.292485	8.3745	0.0571107	0.358646
LTF	0.237636	8.95559	0.0571406	0.358646
IL12RB2	0.278541	8.5403	0.0572626	0.358646
L1CAM	0.261053	8.74933	0.0573992	0.358646
MARCO	0.242133	8.97743	0.0579437	0.360317
GPI	-0.438182	10.2599	0.0580644	0.360317
HMGB1	-0.324877	8.38257	0.0585431	0.362048
DUSP2	0.244099	8.90423	0.0592413	0.364067
IL23R	0.266494	8.69065	0.0592714	0.364067
CCL20	-0.537319	8.99273	0.0597738	0.365913
CTNNB1	-0.36143	10.2627	0.0601596	0.36593
PGR	0.263771	8.71755	0.0603991	0.36593
SMPD3	0.435051	9.3188	0.0607133	0.36593
CCL16	0.317916	8.20366	0.0608182	0.36593
RNLS	0.265908	8.66471	0.060877	0.36593
APH1B	0.251706	8.76107	0.0612973	0.36593
CMA1	0.253752	8.74318	0.0614964	0.36593
TLR8	0.25901	8.72639	0.0616883	0.36593
TNFRSF13C	0.296034	8.41106	0.0618126	0.36593
COL17A1	0.281124	8.40994	0.0618126	0.36593
PALMD	0.260613	8.69215	0.0620492	0.36593
BMP5	0.318571	8.1671	0.0622	0.36593
STAT4	0.241048	8.8601	0.0625941	0.366011
MAP3K5	0.229626	9.00369	0.0636749	0.366011
UBC	-0.508544	11.7003	0.0640827	0.366011
ERCC6	0.239724	8.92352	0.0641214	0.366011
IL22	0.271326	8.59334	0.0643604	0.366011
BMPR1B	0.303651	8.2562	0.0646136	0.366011
CACNG1	0.277431	8.51664	0.0647986	0.366011
FEZ1	0.257799	8.69558	0.0649305	0.366011
MS4A2	0.285516	8.45519	0.0649879	0.366011
H3_5	-0.385412	9.41173	0.0650461	0.366011
ITGA4	0.261475	8.67586	0.0651258	0.366011
TSHR	0.260741	8.65968	0.0653125	0.366011
PAX5	0.231813	8.96861	0.0658157	0.366011
TWIST1	0.260266	8.60271	0.0658161	0.366011
CXCR2	0.265	8.5838	0.0659635	0.366011
IL1RL1	0.26157	8.58398	0.0659635	0.366011
IL19	0.254748	8.72077	0.0660815	0.366011
APOL6	0.215943	9.10126	0.0662419	0.366011
FANCB	0.250222	8.79814	0.0664212	0.366011
ALDOC	0.274612	8.50502	0.0664347	0.366011
TRAT1	0.247858	8.78108	0.0666867	0.366011
ICAM3	0.238725	8.85332	0.0668477	0.366011
TSPAN7	0.227194	9.05764	0.0670985	0.366011
RXRG	0.266006	8.63243	0.0671057	0.366011
ITGAE	0.261673	8.68301	0.0673982	0.366011
ATF3	-0.456215	9.16348	0.0680027	0.366011
CYP8B1	0.279827	8.47925	0.0682064	0.366011
IL5RA	0.282875	8.4363	0.0683474	0.366011
FGF5	0.295558	8.30548	0.0683477	0.366011
COL4A5	0.262158	8.56773	0.0692931	0.366011
FLG	0.247918	8.70535	0.0693293	0.366011
C8G	0.268741	8.63039	0.0693453	0.366011
CD22	0.234717	8.87223	0.0693847	0.366011
CFB	-0.311771	8.91133	0.0693916	0.366011
PYCR1	0.230718	8.92548	0.0696059	0.366011
SOX9	-0.27877	9.64103	0.0696873	0.366011
FGF20	0.276392	8.447	0.0700235	0.366011
CD180	0.251345	8.65191	0.0700341	0.366011
CLU	-0.643437	11.0596	0.0700915	0.366011
MAPK8IP1	0.228394	8.98608	0.0709199	0.367594
SYCP1	0.253441	8.69865	0.0710133	0.367594
GRIN2B	0.257978	8.55945	0.0710219	0.367594
H3C2	-0.470862	9.85191	0.0712062	0.367594
CCL17	0.295324	8.21362	0.0717007	0.369096
KLRD1	0.280574	8.37388	0.0719916	0.369544
CLECL1	0.263136	8.58933	0.0724096	0.370069
CYP4A11	0.331556	7.91866	0.0725869	0.370069
ROR2	0.255838	8.67148	0.0730055	0.370069
BAGE	0.231001	9.20189	0.0732792	0.370069
AIRE	0.276841	8.47215	0.0734155	0.370069
LAMP1	-0.463929	10.2123	0.0736636	0.370069
SMO	0.29255	8.29941	0.0738804	0.370069
NFKBIA	-0.308755	9.70844	0.0741668	0.370069
NR4A1	-0.534887	10.3537	0.0744072	0.370069
IL32	-0.360858	9.76164	0.074502	0.370069
BDNF	0.273316	8.83912	0.0747556	0.370069
ILF3	-0.341776	9.91736	0.0751272	0.370069
ROPN1	0.282296	8.68764	0.0754909	0.370069
TWIST2	0.282933	8.37788	0.075694	0.370069
CCR2	0.255201	8.5904	0.0758145	0.370069
PPP2R1A	-0.283095	9.76805	0.0758893	0.370069
DUSP6	-0.265723	9.16232	0.0759559	0.370069
CACNB2	0.253655	8.61866	0.0771691	0.370069
ASCL1	0.303993	8.12927	0.0772542	0.370069
FBXW7	0.239588	8.79677	0.0772697	0.370069
KRT5	0.319467	9.42477	0.0775126	0.370069
SLAMF6	0.234884	8.77852	0.0776407	0.370069
CXXC4	0.28634	8.25338	0.0777681	0.370069
DDIT3	0.210898	9.11967	0.0778465	0.370069
EIF5AL1	0.256016	8.54353	0.0781685	0.370069
CDH2	0.244983	8.74577	0.0783675	0.370069
ESR1	0.266403	8.5064	0.0785993	0.370069
PIK3CG	0.260315	8.50335	0.0785993	0.370069
JUNB	-0.548509	10.6556	0.0786572	0.370069
TICAM1	0.209921	9.13467	0.0788914	0.370069
SIRPB2	0.258573	9.08049	0.0789045	0.370069
FZD3	0.268795	8.42196	0.079294	0.370069
MMP9	0.233934	8.90227	0.0794216	0.370069
EPHA2	-0.396837	9.68616	0.079639	0.370069
NFATC2	0.234756	8.82974	0.0797451	0.370069
TIAM1	0.22189	8.99208	0.0797544	0.370069
WNT10B	0.241699	8.73657	0.0802425	0.370069
CMTM4	0.219308	8.92348	0.0803301	0.370069
CCL14	0.26995	8.4976	0.0805731	0.370069
NR3C1	0.241616	8.70379	0.0809758	0.370069
CLEC4A	0.240652	8.70298	0.0809758	0.370069
FGF8	0.322865	9.23035	0.0810321	0.370069
HLA_G	0.279095	8.73292	0.0810501	0.370069
SERPINB2	0.254431	8.77136	0.0812008	0.370069
PIN1	0.243987	8.68703	0.0813328	0.370069
CD96	0.218758	8.93172	0.0816929	0.370069
NCF4	0.278191	8.32582	0.081783	0.370069
DIPK2B	0.323935	8.71641	0.0818972	0.370069
VEGFD	0.235216	8.78976	0.0824718	0.370151
IL16	0.262362	8.48847	0.0825978	0.370151
PMCH	0.284212	8.56748	0.0826757	0.370151
JAK3	0.231462	8.77274	0.0828933	0.370151
RPS6	-0.58081	12.5473	0.0829367	0.370151
ADA	0.270498	8.91534	0.0831498	0.37019
TNFRSF9	0.27983	8.33739	0.0838036	0.370811
HSPA2	0.237826	8.72367	0.0841291	0.370811
CXCR6	0.235852	8.72174	0.0841291	0.370811
IL18RAP	0.263627	8.45902	0.0849088	0.370811
MAP3K7	0.230211	9.27322	0.0850168	0.370811
CDC14A	0.230153	8.82405	0.0850263	0.370811
NDUFA11	-0.265738	9.58705	0.0850717	0.370811
IGFBP3	0.292782	9.04394	0.0850848	0.370811
HMGA2	0.223204	9.06807	0.085945	0.370811
PMEL	0.27107	8.32764	0.0859682	0.370811
PIK3R5	0.224926	8.84781	0.0860397	0.370811
SF3B1	-0.269596	10.3357	0.086343	0.370811
SRR	0.261806	9.2374	0.0866039	0.370811
PNOC	0.240579	8.68161	0.0869719	0.370811
CCL5	0.231833	8.67967	0.0869719	0.370811
CCL26	0.264056	8.44728	0.0870533	0.370811
LAG3	0.233911	8.74133	0.0873193	0.370811
PRKACB	0.229866	9.2886	0.0876348	0.370811
BMP8A	0.241401	8.62712	0.0881645	0.370811
ACTB	-0.420723	13.9282	0.0881924	0.370811
C3AR1	0.255981	8.50059	0.0884219	0.370811
PPP2R2B	0.252599	8.50057	0.0884219	0.370811
KLRC1	0.293762	8.15188	0.088505	0.370811
BIRC3	-0.546491	9.12153	0.0885633	0.370811
TLR9	0.226417	8.81022	0.0890508	0.370811
CD81	-0.340051	10.5169	0.0891215	0.370811
GDF15	-0.478537	9.67707	0.0891463	0.370811
NKD1	0.265195	8.44035	0.0892534	0.370811
PRKAR2B	0.231046	8.73327	0.0893959	0.370811
KLRB1	0.255335	8.41804	0.089501	0.370811
HLA_DOB	0.232477	8.71628	0.0898592	0.370811
FCRL2	0.230839	8.77811	0.0900504	0.370811
CMKLR1	0.226109	8.83576	0.0900857	0.370811
TREM1	0.249379	8.47068	0.0909391	0.370811
TDO2	0.234622	8.74374	0.0910357	0.370811
EDN1	-0.318276	8.98903	0.0912272	0.370811
CASP12	0.286574	8.74703	0.0913474	0.370811
MLANA	0.258664	8.42984	0.0915106	0.370811
IFNA2	0.257844	8.42935	0.0915106	0.370811
TXK	0.226372	8.78738	0.0916538	0.370811
IRF5	0.255717	8.41039	0.0917734	0.370811
ANGPTL4	0.219094	8.8837	0.092049	0.370811
WNT5B	0.243579	8.62852	0.0920889	0.370811
C4B	0.253074	9.12771	0.092341	0.371002
TAB1	0.213834	8.96116	0.0926561	0.371444
TERT	0.24237	8.59179	0.0929309	0.371724
IL20RB	0.256046	8.4622	0.0932225	0.372069
MLF1	0.237037	8.72064	0.093699	0.373028
MAGEB2	0.242969	8.63825	0.0938746	0.373028
CD5	0.215751	8.87694	0.0941608	0.373346
HEY1	0.267624	8.37823	0.0943671	0.373347
CD86	0.234701	8.68378	0.0946954	0.373476
BRAF	0.256692	8.53219	0.0949019	0.373476
HDAC10	0.218867	8.90195	0.095099	0.373476
SLAMF1	0.260372	8.47521	0.095224	0.373476
XRCC4	0.214015	8.88433	0.09571	0.374571
CD28	0.22627	8.71099	0.095928	0.374615
IDO1	0.224699	8.69398	0.0964484	0.375224
EGF	0.251217	8.38941	0.0964979	0.375224
MAPK10	0.21364	8.89312	0.0972665	0.376626
PPARGC1B	0.241815	8.65873	0.0974738	0.376626
OSM	0.241776	8.96521	0.0974821	0.376626
IL7	0.25048	8.44262	0.097967	0.377026
POLR2A	-0.288214	9.52201	0.0980221	0.377026
MR1	0.230142	8.76595	0.0982591	0.377026
TLR6	0.238688	8.53581	0.0984179	0.377026
TLK2	0.221043	8.84822	0.0991608	0.379029
CD1B	0.219398	8.79032	0.0993605	0.379029
MAP2K6	0.209939	8.96465	0.0999014	0.379029
MPL	0.232836	8.71415	0.0999803	0.379029
ATOX1	0.195043	9.10481	0.0999867	0.379029
MED12	0.19415	9.15782	0.100484	0.379724
KBTBD8	0.252665	8.41405	0.100794	0.379724
NLRC5	0.222117	8.79949	0.101049	0.379724
CCL13	0.249362	8.50927	0.101293	0.379724
LEP	0.235797	8.59398	0.101372	0.379724
TAPBPL	0.231205	8.65969	0.101666	0.379724
ANGPT2	0.220349	8.78207	0.101676	0.379724
IL24	0.208728	8.91935	0.101978	0.379724
HDAC11	0.23206	8.64361	0.102218	0.379724
IL23A	0.219682	8.86597	0.102424	0.379724
IL33	-0.32469	8.81681	0.102483	0.379724
DEFB134	0.221105	8.90583	0.102712	0.379724
CYP19A1	0.232342	8.68896	0.102939	0.379724
FGF23	0.27626	8.20996	0.103226	0.379724
NOX1	0.216446	8.88965	0.103369	0.379724
FZD4	0.228195	8.67104	0.103523	0.379724
PRLR	0.227316	8.71693	0.104163	0.379919
VCAN	-0.406824	9.85127	0.104337	0.379919
NOD2	0.247116	8.45719	0.104703	0.379919
SNCA	0.240251	8.54952	0.10488	0.379919
C8A	0.262118	8.75428	0.105205	0.379919
TACSTD2	-0.240193	9.0893	0.105297	0.379919
SMAP1	0.210871	8.88256	0.105716	0.379919
CDH3	0.219175	8.7245	0.105983	0.379919
PRG2	0.21145	8.96037	0.105994	0.379919
PBX3	0.224906	8.66097	0.105995	0.379919
TNFRSF12A	-0.421608	9.69623	0.106036	0.379919
S100A12	0.259602	8.37307	0.106342	0.379919
CXCL13	0.26305	8.35052	0.106712	0.379919
FCER1G	0.200818	9.05259	0.106721	0.379919
TBP	0.197914	9.05298	0.106721	0.379919
FGF3	0.247849	8.42575	0.107773	0.382161
ITGAL	0.243299	8.42696	0.107773	0.382161
SOST	0.260468	8.43572	0.108249	0.382787
TNFSF11	0.233874	8.58969	0.108372	0.382787
RAD52	0.246844	8.48007	0.109015	0.384309
AICDA	0.25693	8.33791	0.109436	0.385044
PLCB4	0.209203	8.82898	0.11035	0.38655
PPP2R3A	0.23342	8.58235	0.110999	0.38655
TTPA	0.22635	8.58054	0.110999	0.38655
IKBKE	0.223277	8.64681	0.111119	0.38655
IFNAR1	0.229131	8.49196	0.111185	0.38655
CD1E	0.243013	8.37644	0.111387	0.38655
PDGFC	0.209358	8.89204	0.111491	0.38655
TMUB2	0.202885	8.92945	0.11157	0.38655
CD70	0.217326	8.79427	0.111845	0.386761
SOCS2	0.224342	8.67525	0.112409	0.387464
SUV39H2	0.213288	8.78027	0.112592	0.387464
ROBO4	0.266586	8.50663	0.11269	0.387464
TET2	0.204124	8.90099	0.113189	0.388445
CARD9	0.251362	8.38797	0.113739	0.389595
TBX21	0.21872	8.72861	0.114833	0.392102
PLA2G1B	0.221142	8.66658	0.115075	0.392102
ERG	0.233312	8.60238	0.115121	0.392102
PRAME	0.235482	8.51503	0.115552	0.39216
PTPRR	0.204247	9.00688	0.115579	0.39216
PTCD2	0.227282	8.58327	0.115787	0.39216
BCL2	0.191312	9.0631	0.116079	0.392416
HLA_DPB1	0.263733	8.80519	0.116299	0.392427
REL	0.200882	8.94015	0.117441	0.393412
PRKDC	-0.261109	9.57942	0.117612	0.393412
IL12A	0.247996	8.43283	0.117911	0.393412
IFIT2	0.23722	8.43214	0.117911	0.393412
TMEM140	0.206557	8.8475	0.118258	0.393412
NEGATIVE_PROBE	0.238791	8.41126	0.118473	0.393412
ICAM2	0.3348	9.04877	0.118567	0.393412
WNT11	0.24059	8.48511	0.119019	0.393412
TNR	0.230967	8.48425	0.119019	0.393412
DLL4	0.283926	9.15723	0.119037	0.393412
ORC6	0.234415	8.55639	0.119272	0.393412
GBP4	0.223856	8.62152	0.119274	0.393412
ITGA7	0.244689	8.36611	0.119557	0.393412
LYZ	-0.662959	14.5976	0.119993	0.393412
CXCL10	0.231622	8.60504	0.120004	0.393412
OPN3	0.201698	8.85576	0.120065	0.393412
PSMB10	0.22205	9.46299	0.120414	0.39367
ASPA	0.209313	8.75787	0.120587	0.39367
CXCL3	-0.322415	9.33101	0.120795	0.39367
TGFB2	0.225596	8.63312	0.121362	0.394274
CD1C	0.20883	8.74065	0.121416	0.394274
RUNX3	0.215462	8.78411	0.121662	0.394369
MYD88	0.186839	9.18975	0.122112	0.394844
COL11A2	0.210224	8.72458	0.122245	0.394844
PAX8	0.218615	8.70573	0.123074	0.395393
STC1	0.226284	8.50749	0.123578	0.395393
APC	0.212472	8.7334	0.124232	0.395393
HDAC5	0.204685	8.77571	0.124455	0.395393
SH2D1A	0.206494	8.81835	0.124581	0.395393
SOX17	0.248156	8.78707	0.125226	0.395393
IGLL1	0.275341	8.91606	0.125354	0.395393
GBP2	0.197498	8.88198	0.125519	0.395393
CD27	0.229121	8.44482	0.125638	0.395393
FGF9	0.216184	8.69991	0.12595	0.395393
ADH6	0.262247	8.1941	0.126007	0.395393
SPANXB1	0.236312	8.86693	0.1262	0.395393
CCRL2	0.208234	8.7418	0.126226	0.395393
FGF19	0.238002	8.42406	0.126306	0.395393
IFI6	-0.287179	9.71052	0.126313	0.395393
EOMES	0.230244	8.56838	0.126613	0.395393
CHIT1	0.301059	8.60491	0.126748	0.395393
JUN	-0.521411	10.629	0.126803	0.395393
INHBB	0.292898	8.52566	0.126829	0.395393
BLM	0.223051	8.6162	0.127208	0.395393
IL21R	0.216762	9.11789	0.127237	0.395393
PLA2G4C	0.211252	8.76848	0.127312	0.395393
PLAT	0.27043	9.13115	0.127774	0.395393
FLT3LG	0.206152	8.70817	0.128003	0.395393
CDC6	0.216398	8.59777	0.128029	0.395393
PDCD1LG2	0.227226	8.52847	0.128167	0.395393
CD1A	0.218682	8.64565	0.128524	0.395393
BCL2A1	0.215786	8.6461	0.128524	0.395393
GZMH	0.222737	8.50813	0.128936	0.395654
MAP3K12	0.189066	8.99626	0.12945	0.395654
CACNA2D2	0.240431	8.31583	0.129463	0.395654
CSF3R	0.236599	8.90443	0.129483	0.395654
NEFL	0.199821	8.98501	0.130266	0.395783
TLX1	0.202085	8.84427	0.130284	0.395783
MELK	0.181593	9.07606	0.130325	0.395783
CCL22	0.25371	8.26906	0.130618	0.395783
FAM124B	0.247187	8.26829	0.130618	0.395783
PTCH1	0.192315	9.14896	0.130968	0.395783
MAP3K13	0.202458	8.82847	0.131272	0.395783
CDC25A	0.202388	8.78789	0.131273	0.395783
BATF3	0.220305	8.68154	0.131903	0.396799
FAAP24	0.199378	8.89162	0.132047	0.396799
DSC3	0.228329	8.45844	0.133661	0.400959
ITGB8	-0.212664	9.19866	0.134056	0.400959
TSLP	0.274995	9.22263	0.134096	0.400959
PIM1	0.193246	9.08422	0.134407	0.400997
CCL8	0.242592	8.23486	0.134551	0.400997
MAGEA12	0.187055	9.11186	0.134905	0.401391
MFNG	0.232391	9.37742	0.13513	0.401404
CD74	-0.600744	13.1189	0.135406	0.401564
MNAT1	0.182484	9.06314	0.135898	0.402364
GATA1	0.195956	8.99728	0.136842	0.40309
S100B	0.222148	8.52287	0.136859	0.40309
MMP11	0.211186	8.63915	0.136893	0.40309
VEGFC	0.214888	8.68495	0.137148	0.40309
COL27A1	0.204189	8.81378	0.137255	0.40309
TNFSF18	0.223523	8.42979	0.137761	0.40392
NAT1	0.193832	8.94124	0.138433	0.405236
MAPK8IP2	0.215436	8.60082	0.138804	0.405665
MAML2	0.186536	8.9626	0.139156	0.406039
RAC1	-0.308492	10.0619	0.13947	0.406303
PGPEP1	0.232679	9.28581	0.139714	0.406359
HACD2	0.180018	9.00686	0.140494	0.407973
ICOSLG	0.197139	8.83131	0.141269	0.409568
CR1	0.240765	8.32078	0.141683	0.41011
TNFRSF8	0.192336	8.9201	0.142607	0.412127
ACVR1C	0.206457	8.71486	0.143674	0.41455
RPS6KA6	0.266306	8.11226	0.143933	0.414638
GHR	0.208583	8.60295	0.144436	0.414961
SKP1	0.230256	8.48531	0.144503	0.414961
EPOR	0.248122	8.81632	0.145343	0.415363
PIK3CD	0.205481	8.72339	0.14586	0.415363
TNFRSF4	0.248844	9.02874	0.145971	0.415363
CTCFL	0.222138	8.44349	0.146377	0.415363
LGALS3	-0.366139	10.8838	0.146431	0.415363
CLEC4C	0.253631	8.15388	0.146545	0.415363
CD55	-0.416084	9.55496	0.146568	0.415363
BRD2	-0.242451	9.99885	0.146581	0.415363
SLC39A6	0.176537	9.12789	0.146707	0.415363
CASP10	0.174935	9.0726	0.147012	0.415578
SAMD9	0.204766	8.82263	0.147304	0.415685
SERINC2	-0.247177	9.57039	0.147571	0.415685
BAD	0.176645	9.03928	0.147738	0.415685
NFIL3	0.203799	8.64289	0.148036	0.415877
CD200	0.177517	9.00376	0.148418	0.41622
RIMKLA	0.233074	8.29936	0.148935	0.41622
WEE1	-0.198895	8.94331	0.148997	0.41622
SMARCA4	-0.192688	9.20488	0.149605	0.41622
CDKN2B	0.226101	8.43454	0.149964	0.41622
TNFAIP6	0.196859	8.6977	0.150355	0.41622
CDC25C	0.203681	8.65246	0.150356	0.41622
ADM	0.335989	9.14885	0.150395	0.41622
CXCR1	0.267822	8.54463	0.150638	0.41622
DDIT4	0.285147	9.55159	0.150656	0.41622
FGFR3	0.192351	8.83247	0.150693	0.41622
OAS1	0.197651	9.14916	0.150914	0.41622
PAK3	0.178441	8.99701	0.151572	0.417242
RPL7A	-0.465257	11.8807	0.151745	0.417242
RELN	0.224709	8.37157	0.152846	0.419631
FANCE	0.197001	8.77751	0.153406	0.420249
COL4A6	0.220311	8.42626	0.15364	0.420249
BTLA	0.205644	8.59692	0.153767	0.420249
TMPRSS2	0.358091	9.93323	0.154251	0.420939
MICA	0.168812	9.19137	0.154883	0.421727
TTR	0.226272	8.55035	0.15513	0.421727
IL1A	0.240553	8.21935	0.155238	0.421727
GPX1	-0.307919	10.1563	0.155613	0.421872
FCER2	0.210419	8.50806	0.155758	0.421872
HSPB1	-0.367659	11.404	0.156143	0.422092
GZMA	0.2263	8.43872	0.156353	0.422092
MUC4	0.246974	8.7843	0.156798	0.422092
NFATC4	0.219044	8.48921	0.156863	0.422092
RAD51C	0.190843	8.83829	0.157305	0.422092
BLK	0.206778	8.63781	0.157424	0.422092
DACH2	0.239425	8.25449	0.157469	0.422092
BRCA1	0.201204	8.69157	0.159679	0.422345
IL2	0.203808	8.55029	0.159752	0.422345
PLA2G5	0.201861	8.59877	0.159858	0.422345
TNFAIP3	-0.26555	9.25118	0.159859	0.422345
WNT7A	0.223066	8.4272	0.16017	0.422345
CD59	-0.281762	9.26692	0.16024	0.422345
CASP3	0.187271	8.76266	0.160375	0.422345
CFP	0.218175	8.48052	0.160643	0.422345
SNAI1	0.207036	8.96195	0.160705	0.422345
CCL27	0.244718	8.55197	0.160784	0.422345
MAP4K2	0.226444	9.46123	0.1609	0.422345
FZD10	0.202593	8.67512	0.160955	0.422345
IL21	0.216071	8.40466	0.161266	0.422345
PLA2G6	0.179538	8.97899	0.161426	0.422345
TNFSF4	0.231177	8.3291	0.161567	0.422345
C8B	0.267904	7.98217	0.161656	0.422345
PMS2	0.188172	8.70199	0.162019	0.422345
TNFSF13B	0.183009	8.81323	0.16213	0.422345
KIT	0.221392	8.38493	0.162359	0.422345
ITGA5	0.218987	8.79367	0.162371	0.422345
APOA1	0.231537	8.45452	0.16263	0.422345
RORC	0.198692	8.80249	0.162691	0.422345
TAF3	0.214408	8.43964	0.162936	0.422376
RASAL1	0.175364	9.0652	0.163433	0.423058
ZAP70	0.19226	8.75532	0.163975	0.423626
PRF1	0.189407	8.82363	0.164319	0.423626
AFDN	0.243342	8.83821	0.164575	0.423626
DDX43	0.199285	8.66581	0.164649	0.423626
GATA3	0.206249	8.6214	0.164821	0.423626
IRF1	0.23481	8.23571	0.16559	0.424561
SRSF2	-0.241157	9.55452	0.165836	0.424561
S100A9	0.283243	8.0596	0.165971	0.424561
AKT3	0.206878	8.60226	0.166122	0.424561
EIF4EBP1	-0.224516	8.46051	0.167582	0.427229
FGF22	0.230566	8.6739	0.167638	0.427229
TNFSF9	0.238568	8.74318	0.16853	0.427597
KIR_FAMILY	0.223461	8.33057	0.168621	0.427597
KYAT1	0.187006	8.84065	0.168707	0.427597
LTB	0.167044	9.06644	0.168726	0.427597
CALML6	0.241209	8.13537	0.169388	0.428674
THEM4	0.175031	8.95111	0.169827	0.428695
PLOD2	0.180544	8.98852	0.170058	0.428695
NOG	0.189595	8.88961	0.170106	0.428695
S100A8	0.190491	8.71269	0.170475	0.429029
RIPK3	0.197954	8.69666	0.171901	0.432018
PRMT8	0.187863	8.76594	0.172292	0.432082
PCK1	0.196461	8.90531	0.172404	0.432082
SELE	0.230426	8.37556	0.172784	0.432436
NOS3	0.199559	8.67969	0.173337	0.432856
MS4A4A	0.213851	8.37644	0.173429	0.432856
LAMA1	0.197289	8.58488	0.173954	0.433569
RAF1	0.170351	9.10976	0.174821	0.434874
PBX1	0.194725	8.6142	0.175131	0.434874
BIRC7	0.232614	8.75307	0.175346	0.434874
GNG7	0.203021	8.5149	0.175437	0.434874
TNFSF13	0.27517	9.15323	0.177351	0.439015
TLR7	0.182655	8.8351	0.178426	0.441021
ITGB1	-0.241964	10.6948	0.178648	0.441021
TNFSF14	0.182644	8.79472	0.179269	0.44187
VCAM1	0.200177	8.50798	0.179592	0.44187
FOXO4	0.176151	8.8838	0.179723	0.44187
LY86	0.253091	9.38995	0.180835	0.443424
MAPK11	0.184933	8.77711	0.180844	0.443424
LTA	0.186644	8.80386	0.181599	0.444069
HGF	0.182321	8.73319	0.181605	0.444069
RPA3	0.219851	8.35682	0.182047	0.444069
MAP2K1	0.154506	9.11706	0.182222	0.444069
IL17B	0.214022	8.61773	0.182333	0.444069
AR	0.193555	8.71889	0.183186	0.444951
CRP	0.189534	8.71739	0.183186	0.444951
PPP2R2C	0.212691	8.39083	0.183734	0.44505
KIR3DL3	0.206886	8.44552	0.18388	0.44505
LEF1	0.217515	8.25316	0.184069	0.44505
PSEN2	0.226766	8.16761	0.184318	0.44505
SERPING1	-0.29688	9.95007	0.184455	0.44505
ANP32B	-0.234245	9.74019	0.184897	0.445403
OLR1	0.193533	8.47807	0.185321	0.445403
ATP2A2	-0.22267	9.10937	0.185339	0.445403
ME2	0.162066	9.11042	0.18575	0.445782
IFIT3	0.191971	8.68277	0.186387	0.445782
HHEX	0.208414	8.34743	0.186516	0.445782
SGK1	0.252531	9.45154	0.186536	0.445782
NTHL1	0.182457	8.77942	0.18723	0.445782
ESR2	0.186514	8.70901	0.187283	0.445782
NEIL1	0.245557	9.03073	0.187741	0.445782
IL17A	0.210436	8.32544	0.187908	0.445782
HLA_A	0.313235	12.0087	0.188042	0.445782
FOXJ1	0.207192	8.49055	0.188197	0.445782
NTRK2	0.217117	8.38221	0.188203	0.445782
CHUK	0.173709	8.82962	0.1886	0.446139
MCM4	-0.193308	9.12561	0.189946	0.448213
DPP4	-0.203233	8.82292	0.189971	0.448213
TLR2	0.17988	8.74613	0.19059	0.449088
SAMSN1	0.198653	8.44834	0.191265	0.450094
CD40	0.181931	9.33118	0.191745	0.450638
CXCL11	0.204404	8.3726	0.192781	0.452486
PF4	0.244663	8.59249	0.1932	0.452825
IL1RL2	0.169132	8.95846	0.193425	0.452825
GZMK	0.228386	8.14511	0.193912	0.45338
HERC6	0.170082	8.91906	0.1948	0.454585
ADORA2A	0.252594	7.88824	0.194929	0.454585
RPLP0	0.207622	8.32595	0.19579	0.455118
ITGA2B	0.204937	8.43723	0.195832	0.455118
MSR1	0.203883	8.38369	0.195912	0.455118
PDGFRB	-0.181478	9.25753	0.196595	0.455966
ISG15	0.194912	9.08669	0.197177	0.455966
CASP9	0.17972	8.74678	0.197306	0.455966
ENTPD1	0.203107	8.41748	0.197433	0.455966
SHC1	0.174024	9.61831	0.197735	0.455966
IL6	0.198375	8.5537	0.197994	0.455966
BST2	0.206054	9.39823	0.198038	0.455966
CD3E	0.173718	8.70458	0.198327	0.456051
FGF18	0.200028	8.45121	0.198856	0.456365
TICAM2	0.207863	8.39786	0.199041	0.456365
GLI3	0.18053	8.65764	0.199261	0.456365
LAIR1	0.188696	8.68009	0.199471	0.456365
ZBTB32	0.215688	8.8624	0.199724	0.456367
BCL10	0.17723	8.7842	0.200475	0.457184
NUF2	0.188006	8.56432	0.200823	0.457184
ALDOA	-0.342044	10.0538	0.200838	0.457184
NGF	0.226713	9.05837	0.201739	0.457825
TTK	0.209606	8.29585	0.202167	0.457825
FST	0.191525	8.54563	0.202577	0.457825
PLCE1	0.171814	8.88209	0.202633	0.457825
NTRK1	0.192954	8.62155	0.202839	0.457825
CSF2RB	0.197753	8.49483	0.203154	0.457825
LILRB1	0.176166	8.72324	0.203489	0.457825
SMC1B	0.189353	8.57395	0.203652	0.457825
HDAC1	-0.202294	9.59332	0.203716	0.457825
FCN1	0.210284	8.38751	0.203838	0.457825
CACNG4	0.204	8.32853	0.203899	0.457825
TCL1B	0.186481	8.67837	0.204579	0.458217
SMAD2	0.179339	8.67804	0.204579	0.458217
CXCR5	0.212089	8.77962	0.204948	0.458476
PRM1	0.231169	8.0942	0.205422	0.458758
IRAK3	0.181241	8.63295	0.20558	0.458758
WNT16	0.185458	8.58365	0.20648	0.458878
POLE2	0.183356	8.5858	0.20648	0.458878
TAP2	0.165545	9.2645	0.20664	0.458878
MAP3K8	0.169312	8.87529	0.206909	0.458878
PPBP	0.201413	8.39844	0.207018	0.458878
PIK3CB	0.157621	9.06981	0.207154	0.458878
PTPRC	0.167171	8.80977	0.207894	0.459445
EXO1	0.201069	8.48518	0.207917	0.459445
USP9Y	0.244354	7.90807	0.209073	0.461173
HRAS	0.152218	9.09755	0.209376	0.461173
GBP1	0.195042	8.46575	0.209722	0.461173
P2RY13	0.171881	8.69788	0.209896	0.461173
COX6B1	-0.299881	10.8377	0.210423	0.461173
ELOB	-0.245561	9.36747	0.21051	0.461173
SLC11A1	0.258066	9.15527	0.21083	0.461173
CXADR	0.164466	8.8441	0.210841	0.461173
CBLC	-0.215145	9.48445	0.211122	0.461173
ADGRE5	-0.220391	9.47284	0.211244	0.461173
CACNA1E	0.195149	8.44351	0.21154	0.461264
PITX2	0.199741	8.3879	0.211982	0.461673
IFIH1	0.158944	8.8773	0.213676	0.464534
ATG10	0.188496	8.50689	0.213948	0.464534
FGF11	0.188716	8.58782	0.214065	0.464534
CD14	0.192598	9.12502	0.214436	0.464783
WDR76	0.173006	8.81279	0.21486	0.465145
PRL	0.17756	8.71848	0.215209	0.465344
EGFR	-0.154758	9.16701	0.217413	0.467819
ULBP2	0.221587	8.35232	0.217644	0.467819
CASP7	0.149771	9.08577	0.21772	0.467819
MBNL3	0.158836	8.84578	0.217784	0.467819
MIF	-0.240975	9.9445	0.218291	0.467819
FANCA	0.154865	8.91635	0.218777	0.467819
FOXP3	0.209599	8.48948	0.219039	0.467819
SOD1	-0.262218	10.5525	0.219044	0.467819
UBE2C	-0.259976	9.54201	0.219164	0.467819
PPARG	0.209645	8.23876	0.219289	0.467819
MRC1	0.166302	8.80577	0.219445	0.467819
MPO	0.186532	8.93679	0.219579	0.467819
TARP_TRGC1_2	0.188468	8.44678	0.21971	0.467819
SOCS3	-0.342082	9.19453	0.220632	0.469232
LILRA1	0.191625	8.5091	0.221973	0.46934
CTLA4	0.206084	8.31438	0.222689	0.46934
MLLT3	0.163057	8.86303	0.222725	0.46934
IL12B	0.21319	8.19113	0.222842	0.46934
EPM2AIP1	0.182229	8.54127	0.222976	0.46934
AXL	0.162405	8.88701	0.223031	0.46934
JAML	0.172863	8.64739	0.223417	0.46934
MAPK9	0.161146	8.98469	0.223421	0.46934
EBI3	0.223734	8.89448	0.223506	0.46934
CD46	-0.213609	9.82288	0.223586	0.46934
ISG20	0.224405	7.92849	0.223683	0.46934
TNFRSF10B	-0.183327	9.43481	0.223972	0.46934
LEFTY2	0.210879	8.402	0.224208	0.46934
STAT3	-0.195824	9.58844	0.224309	0.46934
MERTK	0.164579	8.896	0.225467	0.471217
COX4I1	-0.272871	10.6299	0.22594	0.471663
MAPK14	0.166572	9.58411	0.226544	0.472379
CCR4	0.183982	8.57992	0.226852	0.472479
RASGRF2	0.195819	8.36056	0.227597	0.472515
IL2RA	0.234425	8.74085	0.227619	0.472515
PRKCG	0.17637	8.60994	0.227652	0.472515
CACNA1D	0.184894	8.61941	0.227951	0.472594
GPX4	-0.185452	9.91386	0.228547	0.473288
CACNA1C	0.186137	8.47911	0.22919	0.474078
CACNA1G	0.196996	8.73646	0.229686	0.474562
C1QBP	-0.235001	9.64607	0.230003	0.474573
CXCR4	-0.231877	9.2782	0.230215	0.474573
POU2F2	0.204378	8.70821	0.230793	0.47492
CREB5	0.20383	8.91972	0.230908	0.47492
CD19	0.183676	8.49194	0.232342	0.477312
DAXX	0.161547	8.89765	0.232597	0.477312
PSMB9	0.153213	8.8579	0.23467	0.481021
GLUL	0.193274	8.41913	0.235576	0.482332
ARG2	0.17769	8.64128	0.23635	0.48337
ZIC2	0.192892	8.64325	0.239822	0.489602
IL4	0.178306	8.46153	0.239938	0.489602
PLA2G10	0.209099	8.8963	0.240653	0.490341
IL17RA	0.165164	8.75874	0.241082	0.490341
SELENOK	0.182776	8.40762	0.241111	0.490341
CES3	0.157654	8.85936	0.242112	0.490431
KRT10	0.150983	8.90633	0.242374	0.490431
BATF	0.163259	8.68673	0.242632	0.490431
APLNR	0.197432	8.29692	0.242972	0.490431
STAT5B	0.179985	8.47391	0.243184	0.490431
CD160	0.171513	8.5841	0.243278	0.490431
ANKRD28	0.163262	8.76951	0.243797	0.490431
TNC	0.159586	9.11643	0.243889	0.490431
PHGDH	0.158598	8.79506	0.244084	0.490431
IBSP	0.187519	8.90763	0.244269	0.490431
TOX	0.192113	8.33128	0.244353	0.490431
HSPA6	0.149549	9.05032	0.244639	0.490431
PLAUR	-0.224181	9.01065	0.244674	0.490431
RAD51	0.153947	8.87713	0.247234	0.494532
KLRG1	0.172502	8.51535	0.247266	0.494532
GNAS	-0.233891	10.5493	0.247573	0.494599
FGF21	0.201503	8.45395	0.248124	0.495154
RELA	-0.164067	9.36874	0.249147	0.496649
FOXM1	0.154686	8.81114	0.249426	0.49666
LAMC2	-0.370813	8.96971	0.249983	0.497223
C1S	-0.230025	10.2027	0.250324	0.497354
GRB7	-0.177389	8.68157	0.251454	0.499052
CCR5	0.193853	8.13404	0.252278	0.500141
SH2B2	0.17054	9.07574	0.253438	0.500983
ICAM5	0.178764	8.42201	0.253591	0.500983
ABCB1	0.162973	8.69955	0.253649	0.500983
IL17F	0.191641	8.33279	0.253809	0.500983
CALML5	0.169549	8.59763	0.254844	0.501445
TRDC	0.168001	8.59793	0.254844	0.501445
LAIR2	0.15428	8.92666	0.254874	0.501445
DNMT1	-0.161724	8.88455	0.25612	0.503319
TMEM163	0.228184	9.34768	0.256382	0.503319
PTTG1	0.154858	8.81252	0.257328	0.50463
FGF4	0.172093	8.60771	0.257901	0.504661
SIGLEC8	0.170594	8.60875	0.257901	0.504661
IL26	0.179894	8.37962	0.258496	0.50528
MEFV	0.183184	8.41336	0.259485	0.506666
EWSR1	-0.179902	9.99802	0.261572	0.510069
SETBP1	0.174889	8.54312	0.26179	0.510069
PEBP1	-0.190317	10.2852	0.263808	0.512408
PRDX5	0.156836	10.3015	0.263812	0.512408
CEBPA	-0.238382	9.24672	0.263839	0.512408
CREB3L1	-0.195386	10.0569	0.26425	0.512657
WNT7B	0.212954	8.59521	0.264756	0.513089
XPA	0.166497	8.51861	0.26515	0.513303
ERCC3	0.139832	9.07648	0.26603	0.513551
TLR1	0.187487	8.31422	0.266043	0.513551
SMAD9	0.199192	8.71099	0.266128	0.513551
PPP3CA	0.137568	9.10389	0.267997	0.516608
RNF43	0.159628	8.59109	0.269369	0.517878
ITGB6	-0.249479	9.81545	0.269561	0.517878
ETS2	-0.268395	9.91018	0.269595	0.517878
SPA17	0.15683	8.67495	0.270332	0.517878
IL15	0.196732	8.16687	0.270978	0.517878
TBL1XR1	-0.151923	9.14415	0.2712	0.517878
ANXA1	-0.206765	9.95611	0.271249	0.517878
IL25	0.16256	8.54182	0.271643	0.517878
CSF3	0.174812	8.39285	0.271675	0.517878
NT5E	0.179488	8.8264	0.271774	0.517878
SELL	0.193731	8.09818	0.2718	0.517878
CD47	-0.202079	9.55736	0.272203	0.518101
CACNA1H	0.194214	8.43171	0.272768	0.518574
BAIAP3	0.152413	8.86602	0.273293	0.518574
COL11A1	0.151707	8.68605	0.27331	0.518574
ICOS	0.186479	8.2427	0.273821	0.518999
TIE1	0.189211	8.82554	0.275292	0.520754
DLL3	0.208077	8.06543	0.27577	0.520754
FLT3	0.167278	8.43927	0.275963	0.520754
TPI1	0.207252	9.29933	0.276088	0.520754
ERCC2	0.150343	8.77577	0.276471	0.520754
HES5	0.148491	8.77559	0.276471	0.520754
ENDOG	0.134087	8.99866	0.277411	0.521444
JAG2	0.205381	8.59078	0.277953	0.521444
MCM2	0.141219	8.93033	0.278326	0.521444
WIF1	0.160171	8.59222	0.278455	0.521444
ITGA1	0.144626	8.88395	0.278791	0.521444
CDKN2A	0.146418	8.83551	0.279121	0.521444
WT1	0.18395	8.19262	0.279133	0.521444
FGF16	0.206245	8.01892	0.279303	0.521444
FANCG	0.169234	8.44919	0.279427	0.521444
POLB	0.133885	9.11149	0.280152	0.521965
HAMP	0.185257	8.46698	0.280512	0.521965
FH	0.126901	9.09873	0.280571	0.521965
PSMC4	-0.135751	9.16976	0.282276	0.5246
SSX1	0.24383	11.5076	0.283791	0.525357
PRKCE	0.134476	8.92401	0.283825	0.525357
LAMP3	0.193297	8.03263	0.283842	0.525357
CD8A	0.251784	9.02519	0.284035	0.525357
RFC3	0.136259	9.04345	0.284414	0.525357
PRKCB	0.179409	8.37644	0.284423	0.525357
FPR3	0.155671	8.67028	0.285075	0.525753
CXCR3	0.222162	8.70678	0.285744	0.525753
CDC14B	0.141584	8.95618	0.286089	0.525753
F13A1	0.139359	8.95531	0.286089	0.525753
CAMP	0.195595	8.00646	0.286468	0.525753
KRT7	-0.481078	10.4797	0.286651	0.525753
CD3D	0.143474	8.89315	0.286941	0.525753
BLNK	0.1816	8.70259	0.287324	0.525753
PRKAR2A	0.132152	9.03029	0.287347	0.525753
NAT8L	0.228621	8.9688	0.288023	0.525753
FUT5	0.170346	8.38722	0.288063	0.525753
DTX3	0.151492	8.68005	0.288119	0.525753
CD2	0.140753	8.74445	0.291052	0.530174
XCL1	0.154457	8.71663	0.291128	0.530174
PSMB5	-0.178757	9.55553	0.29177	0.530811
CXCL6	0.160495	8.4325	0.292272	0.530969
NSD2	0.132388	8.90215	0.292443	0.530969
CRLF2	0.19028	8.17156	0.292948	0.531292
CT45A1	0.257908	8.99242	0.293208	0.531292
TLR4	0.158851	8.58827	0.293978	0.531626
IL10RA	0.153427	8.58634	0.293978	0.531626
HAVCR2	0.127149	9.05322	0.294764	0.532514
POLR2D	0.139297	8.91017	0.295123	0.532632
NOD1	0.14407	9.01253	0.295535	0.532845
RICTOR	0.144365	8.86335	0.295854	0.532891
SBNO2	-0.161063	9.67218	0.296734	0.53358
RAC3	0.182703	8.97057	0.296826	0.53358
CCL23	0.174935	8.16113	0.300109	0.538904
WIPF1	0.142905	9.47136	0.300612	0.538904
ARNT	0.131182	9.02484	0.30092	0.538904
RPTOR	0.167343	8.98455	0.300977	0.538904
ECSIT	0.136834	8.87956	0.301353	0.539044
ITGAV	-0.201658	9.64657	0.302173	0.539946
PNMA1	0.140307	8.8061	0.302453	0.539946
RORA	0.159015	8.49948	0.30316	0.540526
IL22RA2	0.156479	8.56016	0.303532	0.540526
SPP1	0.278398	8.63896	0.303708	0.540526
HLA_B	0.267388	12.0911	0.303971	0.540526
CPSF7	0.138137	8.83964	0.304941	0.541719
PKMYT1	0.157145	8.5396	0.306759	0.542622
ITGAM	0.155596	8.57137	0.30685	0.542622
CD83	0.160783	8.60087	0.30688	0.542622
POLR2J	0.151414	8.59895	0.30688	0.542622
CCL19	-0.201332	8.14222	0.306947	0.542622
PARP12	0.133975	9.04875	0.308471	0.544785
CLEC14A	0.164412	8.75378	0.309432	0.54595
MME	0.151975	8.63957	0.310046	0.546118
FCAR	0.146849	8.60886	0.31013	0.546118
IL6ST	-0.183683	9.33874	0.31132	0.547681
CD79B	0.159196	8.85839	0.312433	0.548547
LTBP1	0.141136	9.32365	0.31261	0.548547
FAS	0.145344	8.7048	0.312807	0.548547
HLA_DQB1	0.147087	8.67644	0.313043	0.548547
CDH1	0.180638	9.88554	0.313326	0.548547
NDUFA13	-0.180889	10.5939	0.3143	0.549721
AURKB	0.133797	8.89851	0.315596	0.550883
IKBKG	0.198333	9.22215	0.315632	0.550883
EYA1	0.167517	8.48279	0.316206	0.550883
C5	0.16763	8.44877	0.316542	0.550883
NTF3	0.155291	8.44719	0.316542	0.550883
LDHA	0.166703	8.21534	0.316907	0.550883
JADE1	0.137227	8.82561	0.317222	0.550883
CCR9	0.216489	8.73087	0.317568	0.550883
C1R	-0.208518	9.63048	0.3177	0.550883
FPR2	0.175191	8.29204	0.318341	0.551466
DST	0.204499	9.50271	0.318704	0.551569
CCND2	-0.142609	8.85366	0.319936	0.552986
CX3CR1	0.15599	8.45944	0.320134	0.552986
CD3EAP	0.124868	9.0146	0.320876	0.553388
TTC30A	0.139788	8.78455	0.321115	0.553388
DOCK9	0.136802	8.73315	0.322	0.553388
LCK	0.19103	8.87916	0.322024	0.553388
C1QA	0.1913	9.37684	0.322032	0.553388
TNFSF10	-0.170809	9.3581	0.322199	0.553388
APOE	0.143108	8.62215	0.323284	0.554414
CTAGE1	0.164324	8.40636	0.323408	0.554414
NECTIN2	-0.136534	9.29125	0.324839	0.55634
SIX1	0.160034	8.81043	0.325442	0.556848
COX5B	-0.218787	10.6477	0.326886	0.558373
AMER1	0.156213	8.54494	0.327157	0.558373
ALCAM	0.123464	9.14045	0.32747	0.558373
ATP11C	0.133537	8.7762	0.327567	0.558373
TRAF6	0.115707	9.10714	0.328417	0.559296
GPSM3	0.139748	8.64182	0.329784	0.56019
NKX2_1	0.165609	8.29305	0.329784	0.56019
SOS2	0.146293	8.61402	0.330099	0.56019
ALK	0.162519	8.32801	0.330178	0.56019
HLA_DRB5	-0.315673	8.9324	0.330905	0.56082
POLD4	0.133659	8.93667	0.331168	0.56082
SLC7A5	0.143772	8.88897	0.331683	0.561166
ASXL1	0.139912	8.68049	0.332601	0.562195
PIK3R2	-0.134621	9.00125	0.333538	0.562821
KRAS	0.133249	8.90246	0.333592	0.562821
CACNA2D4	0.161117	8.37575	0.334301	0.563143
NOTCH3	-0.126629	9.23648	0.334409	0.563143
JAM3	0.139078	8.74483	0.334716	0.563143
DUSP8	0.116549	9.14093	0.335735	0.564099
TNFRSF1B	0.13874	9.46949	0.335907	0.564099
ITGA2	-0.147788	9.23337	0.336697	0.564903
KDM6A	0.127718	8.86186	0.337961	0.565976
CACNB3	0.126287	8.86221	0.337961	0.565976
NFATC1	0.133317	8.6995	0.338929	0.566672
CD37	0.139034	9.41669	0.339002	0.566672
SDHA	-0.173871	9.63792	0.340179	0.567951
CD34	0.114341	9.09629	0.340394	0.567951
EHHADH	0.121942	9.02494	0.34088	0.568237
MTF1	0.131579	8.8462	0.341622	0.568952
TLR5	0.142815	8.70994	0.342078	0.569188
PRKCA	0.117282	9.16685	0.34252	0.569393
GZMM	0.162111	8.4244	0.343127	0.569393
CYLD	0.134033	8.79851	0.343144	0.569393
CCL1	0.187598	8.86696	0.345161	0.572216
POU5F1	0.150844	8.40974	0.345676	0.572297
NLRP3	0.134872	8.69235	0.345842	0.572297
RHOA	-0.19782	9.85726	0.346995	0.573682
DKK2	0.149663	8.48713	0.34902	0.576503
HNF1A	0.114198	9.12534	0.350422	0.578292
CXCL2	-0.343634	9.98773	0.352265	0.58023
IL10	0.142114	8.6849	0.352883	0.58023
TCF7L1	0.146638	8.46582	0.352925	0.58023
CLEC7A	0.157224	8.2988	0.353401	0.58023
PAK5	0.150985	8.36908	0.353448	0.58023
CHAD	0.189237	8.57397	0.353518	0.58023
C1QB	0.157076	9.25299	0.354262	0.58066
HDAC6	0.119473	9.23796	0.354679	0.58066
HLA_DQA2	0.140323	8.60095	0.354741	0.58066
CAPN2	-0.165627	10.3304	0.355596	0.581534
BCL6B	0.148615	8.44419	0.356891	0.58278
JAK2	0.11449	8.8669	0.357012	0.58278
CACNB4	0.157016	8.3814	0.357323	0.58278
OTC	0.123042	8.81805	0.358926	0.58483
BNIP3	0.144677	8.69184	0.359225	0.58483
PSMB7	-0.116843	9.13214	0.361595	0.587577
TPR	-0.120714	9.16043	0.361831	0.587577
AKT2	-0.136631	8.71835	0.361973	0.587577
MUC1	0.278209	11.6059	0.362209	0.587577
TRIM21	0.166132	9.05703	0.362953	0.588257
TFRC	-0.179012	9.86361	0.36364	0.588827
PTTG2	0.134587	8.74912	0.364106	0.588827
ZEB1	0.13737	8.46806	0.36428	0.588827
PLCG2	0.112946	8.9685	0.365071	0.589287
SETD2	0.115653	9.12111	0.365474	0.589287
CKLF	-0.123132	9.28587	0.366149	0.589287
CD3G	0.123857	8.6953	0.366519	0.589287
IFNL2	0.158155	8.74033	0.366642	0.589287
RRM2	-0.146865	9.38829	0.366837	0.589287
WRN	0.140614	8.54405	0.366841	0.589287
ADAM12	0.161999	8.08059	0.368701	0.590187
LTBR	-0.165902	10.1136	0.368794	0.590187
TNFRSF10C	0.125827	8.81834	0.368908	0.590187
RIMKLB	0.137993	8.61348	0.368936	0.590187
STAT2	0.115934	9.26065	0.36903	0.590187
TOP2A	0.117156	8.96482	0.371804	0.5941
MBL2	0.133129	8.59448	0.373108	0.595657
BTK	0.146994	8.59117	0.374947	0.597579
CSF1R	0.11995	9.34368	0.374971	0.597579
MKI67	-0.134311	9.01474	0.375806	0.597775
MIB1	0.115896	8.94982	0.375847	0.597775
PDGFA	0.151163	8.70668	0.376084	0.597775
ENO1	0.116148	8.92598	0.377113	0.598343
HLA_C	0.196517	11.3175	0.377521	0.598343
CEACAM1	0.115956	8.90129	0.378368	0.598343
NPM1	-0.18858	8.04065	0.378435	0.598343
ZNF205	0.135562	8.64782	0.378472	0.598343
C4BPA	0.133765	8.51391	0.378848	0.598343
MCAT	0.118712	8.82086	0.37905	0.598343
HMGA1	-0.287272	10.3465	0.37955	0.598343
LCOR	0.139267	8.45175	0.38016	0.598343
ATG12	0.138643	8.44995	0.38016	0.598343
SAA1	0.159768	8.66242	0.380173	0.598343
CCL25	0.224818	8.98123	0.380456	0.598343
FOLH1	0.135605	8.41666	0.380734	0.598343
SEMG1	0.145146	8.38391	0.381246	0.598629
CCR6	0.152586	8.2429	0.382566	0.599723
DUSP1	-0.291311	10.0202	0.382809	0.599723
PSPH	0.134342	8.49469	0.383197	0.599723
IRF2	0.116682	8.8039	0.383267	0.599723
MEN1	0.116243	8.9504	0.385597	0.601395
OAS2	0.12432	9.03435	0.386009	0.601395
CD6	0.136024	8.53637	0.386028	0.601395
PARP9	0.107127	9.13043	0.386087	0.601395
RAD21	-0.141435	9.64642	0.386439	0.601395
CXCL5	-0.409099	7.79747	0.386649	0.601395
MAVS	-0.116595	8.96034	0.386974	0.601395
TNFRSF25	0.115398	8.98095	0.386991	0.601395
CLCF1	0.130755	8.70133	0.387901	0.602294
LFNG	-0.191833	9.40642	0.389926	0.60492
GAS1	0.147005	8.30467	0.390629	0.605492
IL11	0.148452	8.23405	0.391334	0.606065
CTAG1B	0.240623	9.04922	0.39226	0.606982
ITGA6	-0.148333	9.47986	0.392989	0.607306
RUNX1T1	0.130589	8.5558	0.39314	0.607306
NFKBIE	0.111882	8.92006	0.394103	0.608275
IL11RA	0.127641	8.69272	0.395584	0.608813
CD209	0.153597	8.24726	0.395618	0.608813
SPIB	0.172712	8.89948	0.395773	0.608813
HLA_DRA	-0.27913	11.2233	0.396188	0.608813
ACSF3	0.11824	9.22259	0.396624	0.608813
NDC80	0.11966	8.81611	0.396761	0.608813
ROCK1	-0.106858	9.13454	0.396804	0.608813
BCOR	0.111673	8.96167	0.398312	0.610222
ATF1	0.118623	8.84943	0.398395	0.610222
GNG12	-0.145171	9.28477	0.399729	0.61141
PDCD1	0.204631	9.36966	0.400104	0.61141
FGF6	0.127131	8.57799	0.400183	0.61141
MST1R	0.145063	9.61898	0.402327	0.614168
CD33	0.110014	8.94549	0.402684	0.614194
ATG5	-0.184818	9.01732	0.403924	0.615177
AXIN1	-0.111409	9.18245	0.404096	0.615177
MAP3K14	0.103227	9.19494	0.40463	0.615177
PSMB8	0.125653	9.46601	0.404932	0.615177
TRAF2	0.101855	9.16098	0.405497	0.615177
SERPINH1	-0.136934	9.3136	0.405609	0.615177
APOA2	0.129415	8.85211	0.40622	0.615177
EFNA3	0.179572	8.65237	0.406264	0.615177
EP300	-0.10589	9.00474	0.406388	0.615177
NF1	0.103625	8.98357	0.406723	0.615177
NOS2	0.148266	8.85446	0.407291	0.615522
GNG4	0.124081	8.56909	0.408361	0.616553
FZD9	0.147689	8.66124	0.409333	0.616553
SPACA3	0.128359	8.63807	0.409335	0.616553
RGMB	0.111586	9.06906	0.40979	0.616553
TGFB1	0.104822	9.07309	0.409845	0.616553
HLA_F	0.159351	11.0816	0.410074	0.616553
EZH2	-0.139833	8.53369	0.410355	0.616553
LILRA3	0.132576	8.48289	0.410719	0.616589
RAB7A	-0.14371	10.106	0.411399	0.617098
ATP5ME	0.129602	10.4138	0.412641	0.61845
NBN	0.106329	8.89217	0.413253	0.618855
IFNL1	0.135368	8.41541	0.413862	0.619256
TMEFF2	0.122081	8.68676	0.414676	0.619449
CCNE1	0.115258	8.68615	0.414676	0.619449
LRP2	0.146386	8.02093	0.415541	0.620231
PBK	0.121217	8.66002	0.416096	0.620548
FANCC	0.144084	8.30951	0.416619	0.620818
COL4A4	0.130143	8.63125	0.417498	0.621147
CCND1	-0.125688	9.90118	0.41755	0.621147
ICAM4	0.139399	8.34145	0.417869	0.621147
WNT2	0.133289	8.39285	0.418784	0.621997
IDH1	-0.20153	9.49329	0.419724	0.622022
FANCF	0.11941	8.73301	0.419726	0.622022
TXNIP	0.192001	11.1727	0.419831	0.622022
FOXC1	0.110155	8.88467	0.420831	0.622703
FBP1	0.113974	8.95129	0.421046	0.622703
MAGEA1	0.167351	9.16663	0.42142	0.622703
EPO	0.144757	8.6703	0.42176	0.622703
CDKN1C	0.181891	9.07374	0.422063	0.622703
PYCR3	0.118762	8.6111	0.422352	0.622703
FCER1A	0.110223	8.8945	0.42379	0.623986
CEBPE	0.15829	8.56259	0.424501	0.623986
GLS	-0.131906	8.67588	0.424828	0.623986
SPRY4	0.107961	8.86982	0.42554	0.623986
ITCH	0.103864	8.86988	0.42554	0.623986
LILRA5	0.150834	8.0092	0.425584	0.623986
PSMB2	-0.107293	9.04095	0.425633	0.623986
TNKS	0.12438	8.52103	0.426544	0.624577
LEPR	0.140589	8.26497	0.426725	0.624577
BID	0.145353	8.18895	0.428354	0.626455
PRKCD	0.122807	9.18081	0.429202	0.626512
BLVRA	0.118166	8.45988	0.429203	0.626512
SYT17	0.112819	8.69686	0.42943	0.626512
NFKB2	-0.133593	9.42646	0.430169	0.627085
HSP90B1	-0.211364	10.4165	0.431468	0.62829
RRAD	0.15745	8.92044	0.431984	0.62829
UTY	0.10918	8.92434	0.432036	0.62829
E2F1	0.112837	8.80572	0.433906	0.629142
NCOR1	0.102852	9.25864	0.434004	0.629142
BCAT1	0.119028	8.68161	0.434401	0.629142
ACY1	0.120862	9.2216	0.434734	0.629142
NDUFS8	-0.114925	9.029	0.434908	0.629142
PPP3CC	0.147501	8.0827	0.434942	0.629142
HSD11B1	0.14398	8.04278	0.435461	0.629142
CASP1	0.108622	8.77949	0.435697	0.629142
REN	0.176563	8.52967	0.435747	0.629142
ETV4	-0.111871	8.85146	0.436876	0.63027
ADH1A	0.225475	10.5978	0.437654	0.63089
JAG1	0.114582	9.70096	0.438297	0.631315
NFE2L2	0.13102	9.78225	0.439329	0.632298
LAMA3	0.146829	8.11025	0.439996	0.632743
IFNAR2	0.109334	8.76234	0.440685	0.632743
PRR5	0.107342	8.76286	0.440685	0.632743
GRIN1	0.21233	9.26362	0.4435	0.635486
TNN	-0.131491	8.96069	0.443669	0.635486
CX3CL1	0.121964	8.50423	0.444187	0.635486
ACVR2A	0.103157	8.86356	0.444287	0.635486
MRE11	0.104793	8.70984	0.444349	0.635486
TRAC	0.093906	9.01152	0.445744	0.636489
DUSP4	0.106858	8.74451	0.445753	0.636489
BRD7	0.0952128	9.02043	0.448523	0.63994
IFI16	0.126495	8.75501	0.449234	0.64045
UBE2T	0.0954026	8.91306	0.451202	0.64275
CXCL8	0.126615	8.34097	0.451739	0.643009
ARID2	0.0943926	9.21131	0.452331	0.643346
ID2	-0.125763	9.61883	0.454123	0.645103
TIRAP	0.121832	8.38701	0.454278	0.645103
IL9	0.138832	8.10086	0.454689	0.645181
CDKN1B	0.0950325	9.09243	0.455077	0.645226
NDUFB11	0.0971273	9.31369	0.456438	0.64665
PFKM	0.113283	8.50552	0.456966	0.646859
LAT	0.132348	8.31807	0.457299	0.646859
CDKN1A	0.102435	8.96391	0.457915	0.647225
NDUFB8	0.0918313	9.10745	0.4604	0.650102
NRP1	0.102163	9.33351	0.460668	0.650102
HLA_DRB	-0.271043	11.3017	0.46136	0.650571
CD84	0.120206	8.37599	0.463857	0.653584
MXI1	0.138117	8.08906	0.465211	0.654874
CDKN2D	0.126067	8.64674	0.465496	0.654874
IFI27	0.164261	10.1488	0.466084	0.654874
CD244	0.119891	8.4986	0.466218	0.654874
GADD45A	-0.158174	9.21277	0.466688	0.655025
MAGEA4	0.183046	9.17735	0.468094	0.65649
PIK3R3	0.135053	8.27142	0.468738	0.656886
HPRT1	0.109914	8.58323	0.469581	0.657264
GATA2	0.16845	9.29744	0.469733	0.657264
TNFRSF10A	-0.112205	8.80087	0.470157	0.657349
GABPA	0.101054	8.65869	0.472361	0.659921
CD53	0.107025	8.6976	0.47356	0.661086
PTEN	-0.129198	9.44351	0.474996	0.662581
HIF1A	-0.105717	9.20366	0.4758	0.663192
TBXAS1	0.0950516	8.92673	0.476225	0.663232
MAPK8	0.088487	9.17915	0.476688	0.663232
HDAC4	0.102131	8.83721	0.477287	0.663232
HSD17B8	0.110903	8.53111	0.477293	0.663232
FZD8	0.108201	9.0095	0.477661	0.663235
DTX1	0.107607	8.57186	0.478795	0.6643
PRUNE1	0.114504	8.50148	0.479371	0.664444
PPARGC1A	0.0964689	8.81222	0.479632	0.664444
LEFTY1	0.142994	8.59161	0.481675	0.666764
SPOP	0.0907101	9.06294	0.483414	0.668661
INPP5D	0.0936737	8.88717	0.484012	0.668978
JUP	-0.173803	9.73909	0.485406	0.670077
PROM1	0.151504	8.80875	0.485547	0.670077
IL12RB1	0.151498	8.08328	0.486106	0.670338
TECR	-0.10614	9.27688	0.486946	0.670986
PRKACA	0.0868304	9.22177	0.487496	0.671233
PIK3CA	0.0946628	8.70661	0.489143	0.672579
ARID1A	-0.108842	9.33081	0.489216	0.672579
AMBP	0.119	8.3369	0.489616	0.672619
RAD50	0.105408	8.575	0.491746	0.674972
RPS6KA5	0.0966563	8.7168	0.492447	0.674972
PLA2G4A	0.0941896	8.7174	0.492447	0.674972
BAMBI	0.109503	8.42669	0.493375	0.675733
IL1RAP	0.0982123	8.72667	0.495732	0.678449
GLI1	0.150135	8.78158	0.49613	0.678481
EIF2B4	0.0871744	9.25896	0.49677	0.678845
MAD2L2	0.0959072	8.73553	0.499001	0.680747
KRT19	0.195014	10.8669	0.499274	0.680747
CD274	0.122421	8.14963	0.49936	0.680747
CEP55	0.0940417	8.77094	0.499665	0.680747
FZD7	0.0922515	8.6716	0.500764	0.681471
COX6A1	-0.160877	11.3057	0.500949	0.681471
IGF2R	0.0950148	8.90723	0.501494	0.681701
TNFRSF14	0.0833363	9.24738	0.503906	0.684466
NASP	-0.102295	9.58915	0.504704	0.684926
VHL	0.0854233	9.09282	0.505001	0.684926
TANK	0.0911678	9.29271	0.505706	0.68537
MET	-0.0991296	9.2663	0.506375	0.685763
MICB	0.0888869	8.858	0.506862	0.68591
TPSAB1	-0.314417	10.4818	0.507513	0.68617
ASPG	0.119808	8.47207	0.507812	0.68617
PDZK1IP1	-0.150785	9.82742	0.508569	0.686682
CGAS	0.0917065	8.70104	0.510812	0.689196
TBC1D10B	0.0848146	9.15381	0.512011	0.6903
NID2	0.102218	8.60829	0.515459	0.694028
IFNA7	0.177148	7.30738	0.515542	0.694028
TLR3	0.108247	8.49687	0.516192	0.694182
F12	0.134341	8.50708	0.516422	0.694182
PPP2CB	-0.10744	9.28614	0.518095	0.695914
RANBP2	-0.0988762	9.46573	0.520045	0.698016
FZD6	0.0929691	8.83513	0.521649	0.699651
ARMH3	0.0825385	8.97206	0.524843	0.703414
IL27	0.113443	8.28188	0.527809	0.70641
MRM2	0.0812882	8.91775	0.527858	0.70641
IFNGR2	-0.0993331	8.86384	0.528308	0.706491
NR4A3	0.100012	8.456	0.529094	0.70702
PGM2	0.0811871	8.9881	0.530552	0.707782
IRF9	0.091135	8.82839	0.530764	0.707782
ITGAX	0.0919023	8.86084	0.530837	0.707782
MTF2	0.102139	8.34505	0.533417	0.7107
TP53	0.080652	8.87042	0.533869	0.710779
HLA_DMA	-0.146005	9.4726	0.53461	0.711243
CENPF	0.0954966	8.66901	0.536071	0.712663
TPM4	-0.129163	11.1426	0.538546	0.715429
FPR1	0.0905535	8.67911	0.539434	0.715754
SOCS1	0.143655	8.7724	0.539823	0.715754
AREG	0.10122	9.23141	0.539976	0.715754
GDF6	0.102565	8.57355	0.541664	0.716943
BIRC5	0.0912241	8.571	0.541664	0.716943
MDM2	0.0820883	9.21306	0.542493	0.717516
CCNB1	0.0847497	8.726	0.54297	0.717623
PTCRA	0.138757	9.21419	0.543741	0.718119
TYMP	-0.0991575	9.31361	0.545325	0.719662
TFE3	0.0849102	8.87208	0.546043	0.719662
BCL6	0.08689	8.69915	0.546101	0.719662
ACVR1B	0.0909559	9.2515	0.546856	0.720133
IFNA8	0.113339	8.06114	0.547849	0.720916
ATG7	0.0882569	8.77846	0.549458	0.722509
FZD5	-0.17386	8.97395	0.550253	0.72303
MYB	0.0943646	8.52105	0.551443	0.724069
IL15RA	0.100384	8.35823	0.552417	0.724822
TYK2	-0.102685	9.49074	0.553745	0.725867
CHEK2	0.0951254	8.44794	0.554014	0.725867
HOXA10	0.0978826	8.52256	0.557701	0.729935
NFKB1	0.0708426	9.23709	0.557927	0.729935
WNT6	0.16203	8.6912	0.558328	0.729935
TXN2	0.0826514	9.51438	0.559919	0.731487
BRCA2	0.113718	8.25139	0.561659	0.733196
TNFSF12	0.136486	9.24522	0.562036	0.733196
TNFSF15	0.0876479	8.6336	0.562579	0.733377
TPO	0.097275	8.34902	0.563565	0.734134
CACNA2D1	0.0910157	8.9918	0.56425	0.734469
FCGRT	-0.115399	10.9164	0.56532	0.734469
NDUFA6	0.0834737	9.41823	0.565862	0.734469
RET	0.16254	9.21028	0.566406	0.734469
ELANE	0.111696	8.97539	0.566536	0.734469
IL2RB	0.108612	8.85886	0.568079	0.734469
GADD45B	-0.10358	9.08162	0.568267	0.734469
SIRPA	0.078821	9.27762	0.568723	0.734469
MDM4	0.0768012	9.34652	0.568936	0.734469
PURA	0.0990627	8.22745	0.569088	0.734469
SOS1	0.0887757	8.5364	0.569224	0.734469
TGFBR2	-0.0912798	9.07977	0.569285	0.734469
IL34	0.0932037	8.57825	0.569363	0.734469
FLNC	-0.0948783	8.8289	0.569497	0.734469
RPS6KB1	0.107548	8.1372	0.571061	0.735962
CXCL9	0.0952065	8.18825	0.572315	0.736892
MSH2	0.0727027	8.94629	0.572596	0.736892
ERBB2	-0.0999997	9.74815	0.57345	0.737467
MAPT	0.0948504	8.38478	0.575447	0.739462
PLA2G2A	0.0768163	9.0089	0.575817	0.739462
MGMT	0.0712132	9.02264	0.576868	0.740287
MAGEA3	0.12147	9.3289	0.577402	0.740448
PML	0.0924018	9.42272	0.578235	0.740992
BMP2	0.0810215	8.90117	0.579682	0.742059
STK11IP	0.125959	9.15915	0.58018	0.742059
LILRB4	0.111688	8.00855	0.580581	0.742059
FCGR1A	0.081492	8.83564	0.580877	0.742059
MX1	0.0868075	8.76152	0.581187	0.742059
NRAS	0.0750532	9.0678	0.581525	0.742059
CCL18	0.201754	9.59618	0.582358	0.742362
TWF1	-0.0921041	9.16313	0.582705	0.742362
CCR7	0.104535	8.38941	0.582992	0.742362
HELLS	-0.0844958	8.69144	0.583647	0.742674
MYBL2	0.0742496	9.10727	0.584117	0.742751
WNT2B	0.0712691	9.1222	0.585509	0.743999
MAPKAPK2	-0.0872115	9.60272	0.58603	0.74414
GAGE1	0.102875	8.08332	0.586769	0.744234
REPS1	0.0790538	8.58971	0.586926	0.744234
EGR2	-0.0804747	8.84561	0.587484	0.74442
NGFR	0.0718091	9.12126	0.589741	0.746758
MS4A6A	0.0872432	8.51994	0.590798	0.747574
ALKBH2	0.0821636	8.79379	0.591315	0.747706
CFD	-0.124049	9.55087	0.593102	0.748778
IL18	-0.0812413	8.93684	0.593434	0.748778
FUT7	0.115617	8.69444	0.5937	0.748778
GLUD1	0.0852165	8.57067	0.594155	0.748778
HOXA11	0.0970449	8.87899	0.594483	0.748778
OLFML2B	0.0678006	8.91038	0.595113	0.748778
UBB	-0.0984754	11.1606	0.595129	0.748778
KRT14	0.168992	9.80623	0.595598	0.748778
NFATC3	0.0660825	9.13967	0.596437	0.748778
SERINC5	-0.0784817	9.93959	0.596437	0.748778
TNF	0.139226	9.70532	0.597106	0.748778
SMAD3	0.0707709	8.9508	0.597122	0.748778
SMAD5	0.0663325	8.99581	0.601798	0.754121
PVR	0.0722177	9.00527	0.604582	0.757085
SLC16A2	-0.097333	9.17789	0.606293	0.758003
COL5A2	-0.0679893	9.0681	0.606484	0.758003
KEAP1	-0.107927	8.03614	0.606569	0.758003
CSF1	0.117882	8.8883	0.607965	0.758717
CUL1	-0.0900153	9.34202	0.608103	0.758717
CXXC5	0.0784121	8.7706	0.608397	0.758717
RUNX1	0.0671109	9.28285	0.60943	0.759051
MAP3K1	0.0718406	9.27055	0.609503	0.759051
SHC2	0.0729645	8.81408	0.610614	0.759913
TCF3	0.0653666	9.12103	0.611833	0.760908
FGF17	0.11432	8.81736	0.613827	0.762863
TNFRSF11B	0.0995716	8.77801	0.615258	0.764118
IFNGR1	-0.0892284	9.29679	0.617528	0.766411
CYBB	0.0928388	8.18429	0.618025	0.766503
SERPINB5	-0.107034	9.09707	0.621351	0.770101
CIC	0.07387	9.11067	0.623011	0.770613
CHEK1	0.0789478	8.57465	0.62304	0.770613
TOLLIP	0.0787159	8.57592	0.62304	0.770613
NECTIN1	-0.0758376	9.44989	0.625647	0.773309
AKT1	-0.0828413	9.72646	0.627435	0.774709
KMT2C	-0.0655835	9.08621	0.627875	0.774709
UQCRQ	0.0721445	9.47417	0.628061	0.774709
RFC4	0.0853387	8.41669	0.629279	0.775682
KRT18	-0.188161	12.5582	0.632086	0.778613
RASGRP2	0.110248	7.83318	0.632544	0.778648
C5AR1	0.0756017	8.42569	0.633019	0.778704
IL18R1	0.0736737	8.56589	0.634238	0.779673
SFRP1	-0.0829095	9.00845	0.636509	0.781935
TBK1	0.06968	8.85996	0.638827	0.783918
IHH	0.0730211	9.22284	0.638988	0.783918
AXIN2	0.108654	9.27523	0.644819	0.789851
E2F5	0.075713	8.41949	0.64493	0.789851
LRP5	-0.0760645	9.38229	0.645132	0.789851
MCM5	0.0578382	9.23347	0.64594	0.790306
CST2	0.0614944	8.73162	0.647283	0.791415
SMARCB1	0.0587303	9.15995	0.648227	0.792034
NDUFA1	0.0827394	10.3429	0.64881	0.792213
NF2	0.0731976	8.65607	0.649918	0.793032
BMP4	0.0922227	8.19249	0.651826	0.793368
TAL1	0.0740273	8.63452	0.651956	0.793368
HOXA9	0.0912357	8.6931	0.652098	0.793368
NDC1	0.060753	9.04058	0.652384	0.793368
STMN1	0.0593247	9.04036	0.652384	0.793368
FOXL2	0.0979663	8.23467	0.653051	0.79357
LGR5	-0.0753269	8.46003	0.653425	0.79357
PRKACG	0.0888957	8.42002	0.654727	0.794618
ATP5F1D	-0.085613	10.372	0.656502	0.795239
WNT3A	0.108664	8.59803	0.657193	0.795239
AMH	0.140739	9.12123	0.657305	0.795239
H2AX	-0.0686075	8.91231	0.657432	0.795239
PUM1	-0.0645717	8.9124	0.657432	0.795239
B2M	0.102394	13.3347	0.658219	0.795336
MDC1	0.0664027	8.59887	0.65919	0.795336
IRS1	-0.0881885	8.89875	0.659267	0.795336
HMGN5	0.0641893	8.46522	0.659561	0.795336
CDH11	0.061953	8.76744	0.659708	0.795336
THBD	-0.0739638	8.90023	0.660551	0.795824
A2M	-0.133398	10.2464	0.661802	0.796801
CEACAM3	0.108281	8.3842	0.66723	0.802802
ATM	0.0535297	9.0212	0.669351	0.80482
MSRB2	0.0516995	8.92106	0.672191	0.807423
HLA_DMB	0.0609035	9.10142	0.672659	0.807423
ITGB2	0.0741706	8.91306	0.672853	0.807423
HLA_DRB4	-0.170734	9.86138	0.674216	0.808524
BNIP3L	0.0671543	8.56225	0.675605	0.809213
ATRX	-0.0673052	8.85833	0.675684	0.809213
PTGS2	0.0860313	8.83883	0.677036	0.810297
TGFB3	-0.0594582	8.95014	0.678763	0.811827
MAP3K20	0.053718	9.05168	0.679986	0.812106
KLF4	0.128473	10.0392	0.680619	0.812106
CCNA1	0.0803771	8.28422	0.680713	0.812106
MAP2K2	-0.0616248	10.0436	0.680789	0.812106
SPRED1	0.0583482	8.84059	0.683637	0.814967
MAPK1	0.0563785	9.03013	0.68467	0.815662
SOD2	-0.0988841	9.99334	0.687996	0.818912
CARD11	0.0617681	8.67988	0.688302	0.818912
IL22RA1	0.0671642	8.73645	0.689528	0.819833
LDHB	0.0806414	8.87572	0.69054	0.819988
GMIP	0.0546614	8.78017	0.690564	0.819988
ASNS	0.0639481	9.55978	0.691559	0.820631
SKP2	0.0536479	8.86666	0.692311	0.820772
DUSP10	0.0583915	8.74656	0.692583	0.820772
PLD1	0.0641022	9.06122	0.693682	0.821537
MIA	-0.0870285	9.04347	0.694479	0.821724
FANCL	0.0531373	9.02447	0.694747	0.821724
STAT1	0.058054	9.54015	0.695732	0.821984
UQCR10	0.0606727	8.6724	0.696638	0.821984
DTX4	0.0557846	8.67169	0.696638	0.821984
TAP1	-0.061699	9.15388	0.696781	0.821984
MUTYH	0.0628611	8.58456	0.697423	0.821991
FGF7	0.0608557	8.72116	0.697695	0.821991
NDUFA2	0.0609122	9.6305	0.700369	0.824606
CCL4	0.072254	8.66634	0.702025	0.826019
ALKBH3	0.0566203	8.55502	0.702743	0.826327
RBP4	-0.0850138	9.13096	0.703771	0.826999
CD69	0.0589387	8.74883	0.706829	0.830054
ABCF1	-0.0499394	9.11304	0.707837	0.830333
APOM	0.0678108	8.0887	0.708113	0.830333
SYK	-0.0476355	9.01749	0.708441	0.830333
KDM5C	0.0606785	8.71296	0.70907	0.830441
IL17RB	-0.0691872	8.74428	0.70945	0.830441
RBX1	0.0542362	9.38359	0.71021	0.830571
IRF7	-0.133852	8.99505	0.710932	0.830571
POLR1B	-0.072176	8.32134	0.710935	0.830571
DTX3L	0.0426081	9.00226	0.71257	0.831346
STK11	-0.0541396	9.07553	0.712896	0.831346
CALML3	0.124074	8.95696	0.712976	0.831346
GNAQ	-0.0638531	8.4755	0.713569	0.831503
NUP107	0.0540511	8.73015	0.715158	0.832819
ETV1	0.0688745	8.34937	0.716554	0.833908
KRT17	-0.134003	8.99523	0.717297	0.834237
CD276	0.0559986	9.10107	0.717982	0.834499
CTSG	0.0643898	8.54706	0.719461	0.835682
FUT4	0.0503203	8.70311	0.72058	0.836382
PARP4	0.057604	9.51815	0.720987	0.836382
HLA_DQA1	-0.0628321	9.28819	0.721473	0.83641
SIN3A	0.0543907	8.87908	0.722383	0.836929
ACTR3B	0.0882562	9.4046	0.723199	0.837339
PHF6	0.0503032	8.8033	0.724558	0.838378
ARNT2	0.0452236	8.72257	0.726642	0.840252
NFKBIZ	-0.0858325	9.68966	0.728255	0.84158
PIAS4	0.0502108	8.77737	0.730019	0.843081
GTF3C1	0.0483252	8.94508	0.730787	0.84343
FLNB	0.0632081	9.62263	0.735878	0.848766
CDK2	0.056232	8.41989	0.738009	0.850682
PDGFB	0.0566252	8.43243	0.741471	0.853619
PTPN11	-0.0495366	9.28413	0.741499	0.853619
FOSL1	0.0476942	8.73444	0.744206	0.855648
TCF7	0.0468432	8.73535	0.744206	0.855648
TRBC1	0.0568781	9.22737	0.750307	0.862116
VEGFA	0.0665428	10.7038	0.753685	0.865448
CD63	-0.0952545	11.1371	0.754977	0.865776
KITLG	0.0452718	8.53157	0.755389	0.865776
MNX1	0.0662931	9.65264	0.755404	0.865776
IRF8	-0.0564172	9.16391	0.756441	0.866417
IL7R	-0.0550947	8.57776	0.758473	0.868196
E2F3	0.0530152	8.27153	0.759615	0.868954
SLC2A1	0.0427077	9.04696	0.764528	0.873674
XCR1	0.101535	9.58381	0.765023	0.873674
NDUFA7	-0.0557969	9.65913	0.76561	0.873674
TMEM45B	0.0437645	9.18799	0.76567	0.873674
ZEB2	0.0385804	9.13806	0.769497	0.877488
HCK	0.0514775	8.77334	0.770354	0.877913
PPP3CB	0.0419118	8.63506	0.771125	0.878239
SPRY1	-0.0487837	8.50995	0.772073	0.878497
ST6GAL1	-0.0388877	9.09163	0.77262	0.878497
CCL7	0.0699062	7.92166	0.773099	0.878497
FOXA2	0.0874	9.69981	0.773291	0.878497
CASP8	0.032304	9.20623	0.774083	0.878847
HLA_E	0.0593452	10.264	0.774655	0.878945
SMC1A	0.0324194	9.21125	0.775812	0.879707
CDK1	0.0366073	8.71223	0.779725	0.883195
KMT2D	-0.0494965	9.38913	0.779863	0.883195
P4HA1	0.0325964	9.13343	0.780896	0.883441
PPL	-0.0450695	8.77534	0.781479	0.883441
DAB2	0.0380406	8.76657	0.782104	0.883441
CREB3L4	0.0553169	8.10049	0.783412	0.883441
CCL3_L1	0.0873049	9.48101	0.783619	0.883441
G6PD	0.0406332	8.9897	0.78412	0.883441
RASA4	0.0474019	9.33813	0.784163	0.883441
LAMA5	0.0425035	9.21965	0.784436	0.883441
CRABP2	0.0470792	8.29785	0.784468	0.883441
CEBPB	-0.0424361	9.22596	0.79025	0.889399
PIK3R1	0.0392737	8.97474	0.792549	0.891433
POLR2H	0.0344971	9.13568	0.793623	0.891515
ELK1	-0.0405718	8.94585	0.794601	0.891515
SMC3	0.0403563	9.27038	0.794616	0.891515
KIF2C	0.0493497	8.39484	0.794706	0.891515
ETV7	0.0590008	8.27549	0.795082	0.891515
NDUFA3	0.0360618	10.2258	0.796427	0.892471
NDUFB10	0.0378302	9.83837	0.797589	0.893221
DNAJC14	0.0396151	8.73251	0.800362	0.895773
FADD	0.0468373	8.6865	0.801164	0.896117
VSIR	0.0475012	9.07156	0.801728	0.896194
CBL	0.0477617	8.58949	0.802667	0.896691
PVRIG	-0.0489697	9.18672	0.805917	0.899443
ATR	0.034091	8.97589	0.806123	0.899443
IL4R	-0.0373394	9.50313	0.807737	0.900689
NDUFA12	-0.0437043	9.64551	0.809034	0.90158
UQCR11	0.0293128	9.15059	0.811019	0.902214
INHBA	0.0412248	8.45215	0.811026	0.902214
VEGFB	0.0313269	8.99135	0.811097	0.902214
HK1	0.0448988	8.97949	0.814956	0.905951
GOT2	-0.032547	9.05812	0.816592	0.906942
NSD3	0.0361319	8.88298	0.8172	0.906942
LRP6	0.0471181	8.47561	0.817349	0.906942
IDH2	0.0301623	9.11639	0.819137	0.907632
FGFR2	-0.0320235	9.17189	0.819325	0.907632
MECOM	0.0383205	9.74156	0.819474	0.907632
CCL15	-0.165136	10.3761	0.822984	0.910741
POLD1	0.0416107	9.11665	0.823286	0.910741
RIPK1	0.0368175	8.56076	0.825493	0.912626
SFXN1	0.0340332	9.00265	0.827086	0.913829
CDC7	0.0445699	8.45507	0.827733	0.913987
DDB2	0.0353598	9.00981	0.829505	0.915003
LRRC32	0.0425381	8.52148	0.829664	0.915003
LCP1	0.0363496	8.69024	0.831632	0.916617
NDUFB7	-0.0321105	11.1859	0.833742	0.918169
MTOR	0.0310999	9.14004	0.834054	0.918169
TNFRSF1A	0.0325578	9.62746	0.837196	0.921068
OAT	-0.0384561	9.58079	0.841369	0.924303
SP1	-0.0268824	9.06273	0.8415	0.924303
CDC25B	-0.0392463	9.51711	0.841666	0.924303
ZBTB20	-0.0475633	8.33734	0.843489	0.925195
HES1	0.033126	9.51664	0.8435	0.925195
IGF1	0.0293055	8.57342	0.844475	0.925387
GRB2	0.0229694	8.97224	0.844696	0.925387
JAK1	-0.0310916	9.78218	0.848699	0.928776
NSD1	0.0331424	8.53334	0.848964	0.928776
NUMBL	0.0500686	9.15266	0.84974	0.928776
HSPA1A	0.0374682	10.2046	0.84984	0.928776
IRAK4	0.039328	8.35629	0.850619	0.929067
YTHDF2	0.0246993	9.44203	0.853098	0.930719
IL2RG	0.0296297	9.36236	0.853293	0.930719
CD58	0.024194	8.95779	0.853673	0.930719
SMAD4	-0.0321465	9.06004	0.854722	0.931303
FEN1	0.0225284	9.0127	0.856602	0.93279
CEACAM8	0.0458831	8.58413	0.858218	0.933988
SLC25A1	0.0341913	9.15787	0.859704	0.935044
IGF1R	0.0328661	8.74138	0.860383	0.935221
MBNL1	-0.0408516	9.51818	0.861004	0.935335
PKP3	-0.0354127	9.52565	0.863145	0.937099
IER3	0.0425735	10.3656	0.866425	0.93949
HLA_DRB3	-0.0749337	10.5232	0.867525	0.93949
GPR160	0.0289918	8.71463	0.867625	0.93949
CCL2	-0.0632322	9.51358	0.868114	0.93949
TYMS	0.0288454	9.09547	0.868411	0.93949
IRAK2	0.0330484	8.82099	0.868735	0.93949
PPP3R1	-0.0289246	9.11581	0.868977	0.93949
ACTA2	-0.0459619	10.4047	0.870898	0.941006
GOT1	0.0254127	8.97736	0.872264	0.941921
PRC1	0.0234605	8.889	0.874083	0.942144
CD68	0.0349498	9.90717	0.874361	0.942144
FUBP1	-0.0321365	9.16811	0.874427	0.942144
GNGT1	0.0336363	8.0118	0.874551	0.942144
ATG16L1	0.0242885	8.7954	0.875888	0.942303
TNFRSF10D	-0.0325274	8.23305	0.876242	0.942303
FCGR3A	-0.0258549	8.72705	0.876258	0.942303
EFNA5	0.0222089	8.47371	0.881076	0.94653
IKBKB	0.0218743	8.9144	0.881312	0.94653
AURKA	0.0336959	8.04444	0.881757	0.94653
TAPBP	-0.0297616	9.19974	0.883522	0.947373
TFEB	0.0245497	8.96932	0.883774	0.947373
OAS3	0.0243257	8.54736	0.884471	0.947373
SIGIRR	-0.0190349	9.23182	0.884633	0.947373
TRAF7	0.0231651	9.32581	0.887789	0.949599
SRP54	0.0225139	9.16026	0.888061	0.949599
CDK4	-0.0258675	9.08545	0.888284	0.949599
EFNA2	-0.0347098	8.88557	0.89091	0.951845
APOC3	0.0360871	9.04061	0.893005	0.953521
CTSS	0.020465	9.91355	0.895011	0.9551
CXCL1	-0.0668401	9.62457	0.896262	0.95574
CD163	-0.0310242	8.8812	0.896666	0.95574
IRF3	-0.0169427	8.97965	0.897529	0.956098
MSH6	-0.0347634	8.31926	0.89828	0.956336
SERINC1	-0.0301182	9.5745	0.899311	0.956612
PYCARD	-0.0269638	9.12354	0.899845	0.956612
SPINK1	-0.111619	12.0589	0.900469	0.956612
BMI1	0.029661	8.78224	0.900651	0.956612
LYN	0.01721	9.07601	0.901625	0.957085
GUSB	0.0138919	8.98769	0.903139	0.957582
CYFIP2	0.019638	8.67984	0.903401	0.957582
SF3A1	0.0167157	9.40173	0.903679	0.957582
COLEC12	0.0170477	8.69036	0.905965	0.958944
SOX2	-0.0302079	9.21744	0.906022	0.958944
PCK2	-0.0144273	9.05497	0.908099	0.960581
MRPL19	0.0148282	9.27861	0.908634	0.960586
HLA_DPA1	-0.0315008	9.67671	0.9102	0.961681
LIF	0.0166064	8.79051	0.911307	0.962289
RELB	0.0292035	8.8205	0.913269	0.963536
IFITM1	0.0201007	9.4104	0.913551	0.963536
NDUFB4	-0.0230434	10.3863	0.914615	0.963924
AKAP1	-0.0237128	9.26677	0.914983	0.963924
RIN1	-0.0451608	9.276	0.915769	0.963989
CCND3	0.012982	9.4763	0.916376	0.963989
SFN	0.0201912	10.1023	0.917155	0.963989
CPA3	0.0229737	8.69876	0.917734	0.963989
ZBTB16	0.0241089	8.28094	0.918216	0.963989
TNFRSF11A	-0.0207357	9.00791	0.918236	0.963989
DDX58	0.0214428	8.50126	0.920219	0.964837
ITGB4	0.0200322	9.9648	0.920631	0.964837
SPRY2	0.0181438	9.27982	0.920641	0.964837
FAP	0.02279	8.52232	0.925614	0.969487
ABL1	-0.024576	9.39665	0.926862	0.969987
ARID1B	0.0133527	8.82773	0.927522	0.969987
EFNA1	0.0204029	9.40749	0.927697	0.969987
SLC1A5	0.015255	9.63823	0.929052	0.970428
RBL2	-0.0146402	9.20669	0.92919	0.970428
HDAC3	0.0167181	8.54429	0.930917	0.971671
GNA11	0.0136228	9.34831	0.931909	0.972147
CCL21	0.0272718	8.63081	0.932453	0.972155
TNFRSF18	0.0152251	8.62618	0.935328	0.974592
API5	-0.023408	9.42046	0.936828	0.975589
DNMT3A	0.0165964	8.62522	0.937362	0.975589
DSP	0.012555	10.2306	0.938422	0.976132
ITGA3	-0.0212719	9.5795	0.94009	0.977305
STAG2	0.0138525	9.34917	0.940971	0.977483
PGF	0.0201417	8.38073	0.94134	0.977483
RAC2	0.0293634	8.29295	0.944187	0.979878
ICAM1	-0.0244879	8.79265	0.946051	0.981251
GSK3B	0.0141508	8.93993	0.956687	0.991715
FSTL3	0.0183909	8.64968	0.957986	0.992494
PRKAR1B	0.00849917	9.06156	0.962491	0.996033
PBRM1	-0.0220069	8.15131	0.962606	0.996033
BRD3	0.0142245	8.32375	0.963051	0.996033
ZC3H12A	0.00971604	9.01619	0.96382	0.996259
PYCR2	0.010323	8.57012	0.968756	1
NOTCH1	-0.00830428	8.71642	0.96889	1
COL5A1	0.00524661	10.1365	0.970425	1
HDAC2	0.00410782	9.09993	0.972533	1
BBS1	-0.00991265	8.61989	0.973515	1
ATF2	0.00729206	9.41283	0.975022	1
RB1	0.0103198	8.6722	0.976649	1
RIPK2	0.0147765	8.46554	0.977156	1
NUPR1	-0.0729699	11.156	0.978305	1
TFDP1	-0.00646757	9.19523	0.980159	1
STING1	-0.00594757	9.2203	0.982059	1
PSEN1	0.00740542	9.1424	0.98417	1
PMAIP1	0.0102116	8.17324	0.985285	1
NDUFS7	-0.00785089	9.77524	0.985599	1
FGFR1	0.00161051	9.10764	0.987758	1
U2AF1	0.00110007	9.9415	0.988392	1
FGCR2A	-0.0104529	9.46844	0.988884	1
NDUFB1	-0.00601365	9.74602	0.989118	1
ERO1A	-0.00702985	9.53816	0.990015	1
BAP1	0.00560121	8.66378	0.990057	1
STAT6	-0.00596863	10.0167	0.992504	1
SERINC3	-0.00744329	9.4402	0.993662	1
FYN	-0.00397066	8.73106	0.994368	1
LILRB2	-0.0151635	8.38638	0.994414	1
IL1R1	0.00332389	9.12134	0.994594	1
FZD1	0.00315099	9.17563	0.995541	1
CNOT2	-0.00582039	8.43618	0.996095	1
PC	0.0116636	8.52354	1	1
PFKFB3	-0.0081316	9.14448	1	1
CXCL12	0.00740491	8.42902	1	1
BBC3	0.00691532	8.62614	1	1
PRKX	-0.00672794	8.61327	1	1
ITPK1	-0.00643163	8.71839	1	1
CDC20	-0.00589951	9.02991	1	1
CMTM6	-0.00579453	8.49425	1	1
CREBBP	-0.00577758	8.95898	1	1
PLCB1	0.00493288	8.05365	1	1
FUT8	-0.00466142	9.03171	1	1
GTF2H3	-0.00442066	8.85672	1	1
ETS1	-0.00432348	9.13516	1	1
NOTCH2	-0.00423012	9.07193	1	1
EIF2AK2	-0.00417712	9.12664	1	1
FOXA1	-0.00412321	9.13009	1	1
COMP	-0.00383045	8.22148	1	1
COL4A3	-0.00381662	8.17732	1	1
TGFBR1	0.0033005	8.9473	1	1
SREBF1	-0.00268161	9.61332	1	1
TRAF3	0.00168233	8.66994	1	1
ASL	-0.00166786	9.63645	1	1
SLC16A1	-0.0015134	9.67142	1	1
LAMB3	-0.00112985	9.85887	1	1
CREB1	-0.00106047	8.40246	1	1
HLA_DOA	0.000968825	8.23827	1	1
FGFR4	-0.000958795	8.97566	1	1
PLK1	0.000588505	8.93781	1	1
CD40LG	0.000569655	8.2743	1	1
E2F4	0.000321471	9.58927	1	1
CFI	-0.000310506	8.8897	1	1
ANLN	-0.000139945	8.9053	1	1
