# Supplementary material
Source: HighWire-hosted journal article supplement (https://gut.bmj.com/content/gutjnl-2024-334589)
Supplement: inline-supplementary-material-9 [file inline-supplementary-material-9.xlsx]

## Sheet: Sheet1
Supplementary table 7 Reactome gene set enrichment analysis table SRC vs IC
	Description	setSize	enrichmentScore	NES	pvalue	p.adjust	qvalues	core_enrichment
R-HSA-392499	Metabolism of proteins	222	-0.429294	-2.40882	1e-10	7.26e-08	5.51579e-08	8454/7048/7314/5903/3091/2033/5690/9817/8312/57506/5695/7175/5728/4791/5704/5885/7879/55970/1786/5970/5693/4869/90993/6774/387/3065/1803/7184/5329/1978/6923/11065/5591/7128/5713/966/4792/90865/9021/1499/1462/4609/1604/5111/1512/60/467/6130/8358/7316/330/6233/6194/8355/8357/351/4069/7070/9349/4061/4312/7057/718/2335/1755/5265
R-HSA-109582	Hemostasis	186	-0.398645	-2.1909	1.16152e-07	3.12873e-05	2.37705e-05	387/7465/3685/961/3065/488/5329/2778/708/4282/3688/6647/5518/710/5879/226/4267/60/8358/388/8355/972/4072/2316/8357/351/1191/928/1277/1278/4312/7057/2335/960/4680/5265
R-HSA-597592	Post-translational protein modification	160	-0.411576	-2.18133	1.29286e-07	3.12873e-05	2.37705e-05	8454/7048/7314/5903/3091/2033/5690/9817/8312/57506/5695/7175/5728/4791/5704/5885/7879/1786/5970/5693/4869/387/3065/7184/5329/6923/11065/5591/7128/5713/966/4792/90865/9021/1462/4609/1604/5111/60/7316/330/6233/351/7070/4061/7057/718/2335/5265
R-HSA-1474228	Degradation of the extracellular matrix	38	-0.62392	-2.52327	6.85777e-06	0.00124468	0.00094565	7177/3918/1281/1277/1278/1293/4312/2335/960/4316
R-HSA-5653656	Vesicle-mediated transport	55	-0.520914	-2.31357	1.70711e-05	0.00247873	0.00188321	208/7879/1956/7037/7184/966/5879/4035/1604/60/7316/6233/351/1281/1277/1278/5265
R-HSA-446203	Asparagine N-linked glycosylation	10	-0.852126	-2.34879	2.26546e-05	0.0027412	0.00208263	966/1604/7316/6233/5265
R-HSA-3000170	Syndecan interactions	17	-0.743477	-2.36378	5.91164e-05	0.00613122	0.0046582	3673/3655/3685/3688/1281/1277/1278/7057/2335
R-HSA-76002	Platelet activation, signaling and aggregation	82	-0.44249	-2.14021	0.000101656	0.00770932	0.00585716	6647/710/5879/226/388/2316/351/1191/928/1277/1278/7057/2335/5265
R-HSA-1474244	Extracellular matrix organization	106	-0.399539	-1.97597	0.000104464	0.00770932	0.00585716	63923/2/871/3673/3655/824/3685/961/3696/3688/3694/7177/3918/1462/351/1281/1277/1278/1293/4312/7057/2335/960/4316/4680
R-HSA-6806834	Signaling by MET	37	-0.574675	-2.3135	0.000106189	0.00770932	0.00585716	3673/6774/3688/5879/3918/7316/6233/1281/1277/1278/2335
R-HSA-201681	TCF dependent signaling in response to WNT	63	-0.473158	-2.14524	0.00012725	0.00839852	0.00638078	3014/8549/4041/207/6422/7314/2033/5690/5516/8312/5695/5704/208/7855/5693/6597/3065/5713/6662/5518/1499/4609/8358/22943/7316/6233/8355/8357/6423
R-HSA-5663205	Infectious disease	170	-0.32767	-1.7602	0.00017118	0.0100934	0.00766847	7314/5903/4233/3460/7297/6093/5690/5695/7175/4791/5704/2146/7879/55970/79718/1956/5970/5693/4869/3065/7852/2778/3688/6923/23476/5713/3159/5430/5879/1499/60/6130/8358/203068/7316/3725/6233/6194/8355/8357/351/9349/928/718
R-HSA-9633012	Response of EIF2AK4 (GCN2) to amino acid deficiency	10	-0.809557	-2.23145	0.000180736	0.0100934	0.00766847	1051/467/6130/6233/6194/9349
R-HSA-1442490	Collagen degradation	22	-0.655623	-2.28609	0.000238926	0.0122094	0.00927608	1281/1277/1278/1293/4312/4316
R-HSA-9711097	Cellular response to starvation	12	-0.761739	-2.23247	0.000258705	0.0122094	0.00927608	1051/467/6130/6233/6194/9349
R-HSA-68886	M Phase	45	-0.529085	-2.21793	0.000269077	0.0122094	0.00927608	7314/5903/5690/5516/5695/7175/5704/5885/5693/11065/5713/5518/8358/203068/7316/6233/8355/8357
R-HSA-8953854	Metabolism of RNA	44	-0.535081	-2.24725	0.000298992	0.0125713	0.00955106	207/9261/7314/5903/5690/5695/7175/5704/5693/6427/23451/5713/5518/5430/3315/6130/7316/6233/6194/9349
R-HSA-6798695	Neutrophil degranulation	118	-0.369919	-1.87449	0.000311685	0.0125713	0.00955106	387/3417/3685/961/976/5329/4282/5713/966/5879/3146/226/3958/1604/1512/2821/3916/203068/5315/4069/718/960/4680/5265
R-HSA-9609646	HCMV Infection	18	-0.686409	-2.22647	0.000368802	0.0133875	0.0101712	5903/7175/2146/79718/1956/3688/8358/8355/8357
R-HSA-9609690	HCMV Early Events	18	-0.686409	-2.22647	0.000368802	0.0133875	0.0101712	5903/7175/2146/79718/1956/3688/8358/8355/8357
R-HSA-381426	Regulation of Insulin-like Growth Factor (IGF) transport and uptake by Insulin-like Growth Factor Binding Proteins (IGFBPs)	27	-0.60281	-2.20822	0.000416288	0.0138487	0.0105215	1462/351/4312/718/2335/5265
R-HSA-114608	Platelet degranulation	37	-0.544406	-2.19165	0.000459384	0.0138487	0.0105215	6647/710/226/2316/351/1191/928/7057/2335/5265
R-HSA-8953897	Cellular responses to external stimuli	139	-0.340903	-1.78577	0.000465817	0.0138487	0.0105215	9261/8454/7314/5903/6648/3091/2033/5690/9817/5695/7175/5704/2146/79718/1337/5970/5693/6774/1329/6923/11065/6647/2114/1327/5713/3159/1340/2876/467/6130/8358/7316/3725/6233/6194/1021/8355/8357/9349/2353
R-HSA-2559582	Senescence-Associated Secretory Phenotype (SASP)	30	-0.580396	-2.1703	0.000470977	0.0138487	0.0105215	5970/6774/11065/8358/7316/3725/6233/1021/8355/8357/2353
R-HSA-2262752	Cellular responses to stress	138	-0.343341	-1.79636	0.000476882	0.0138487	0.0105215	9261/8454/7314/5903/6648/3091/2033/5690/9817/5695/7175/5704/2146/79718/1337/5970/5693/6774/1329/6923/11065/6647/2114/1327/5713/3159/1340/2876/467/6130/8358/7316/3725/6233/6194/1021/8355/8357/9349/2353
R-HSA-202733	Cell surface interactions at the vascular wall	74	-0.423495	-1.97934	0.00053837	0.0150329	0.0114213	5296/3655/2886/8795/3685/961/4282/3688/4267/972/4072/1277/1278/4312/2335/960/4680
R-HSA-9645723	Diseases of programmed cell death	21	-0.632989	-2.1746	0.00061758	0.0164228	0.0124773	3014/6648/2146/1786/824/708/8358/3725/8355/8357/351
R-HSA-8875878	MET promotes cell motility	24	-0.614764	-2.17582	0.000652535	0.0164228	0.0124773	3688/5879/3918/1281/1277/1278/2335
R-HSA-9018519	Estrogen-dependent gene expression	33	-0.552408	-2.14703	0.000670089	0.0164228	0.0124773	2033/8312/595/5885/3065/5430/4609/8358/3725/8355/8357/2353
R-HSA-9010553	Regulation of expression of SLITs and ROBOs	18	-0.668963	-2.16987	0.000690564	0.0164228	0.0124773	7314/5690/5695/5704/5693/6923/5713/6130/7316/6233/6194/9349
R-HSA-3214858	RMTs methylate histone arginines	14	-0.721022	-2.21473	0.00070125	0.0164228	0.0124773	55193/1019/3014/8289/595/6597/8358/8355/8357
R-HSA-76005	Response to elevated platelet cytosolic Ca2+	40	-0.524016	-2.12995	0.000731092	0.0165866	0.0126017	6647/710/226/2316/351/1191/928/7057/2335/5265
R-HSA-2559580	Oxidative Stress Induced Senescence	35	-0.534821	-2.13293	0.000804615	0.0177015	0.0134487	8358/7316/3725/6233/1021/8355/8357/2353
R-HSA-71387	Metabolism of carbohydrates	39	-0.515036	-2.07239	0.000840277	0.0177928	0.0135181	7314/5903/5516/7175/5518/226/1462/2821/7316/6233/5315/960
R-HSA-3000171	Non-integrin membrane-ECM interactions	33	-0.545504	-2.1202	0.000866807	0.0177928	0.0135181	3673/3655/3685/3688/3918/1281/1277/1278/7057/2335
R-HSA-69278	Cell Cycle, Mitotic	111	-0.359294	-1.81122	0.000916498	0.0177928	0.0135181	8454/7314/5903/2033/5690/5516/5695/7175/595/5704/208/5885/894/6241/5693/4173/7465/3065/11065/5713/5518/4609/4176/5111/8358/203068/7316/6233/1021/8355/8357
R-HSA-5617472	Activation of anterior HOX genes in hindbrain development during early embryogenesis	19	-0.645351	-2.13518	0.000931305	0.0177928	0.0135181	8085/58508/3014/1959/2033/2146/5430/8358/3725/8355/8357
R-HSA-5619507	Activation of HOX genes during differentiation	19	-0.645351	-2.13518	0.000931305	0.0177928	0.0135181	8085/58508/3014/1959/2033/2146/5430/8358/3725/8355/8357
R-HSA-9707564	Cytoprotection by HMOX1	31	-0.541244	-2.06413	0.000973035	0.0181134	0.0137617	8454/7314/5690/9817/5695/5704/79718/1337/5693/6774/1329/1327/5713/1340/7316/6233
R-HSA-5625740	RHO GTPases activate PKNs	10	-0.769097	-2.11993	0.00100146	0.0181765	0.0138096	387/5879/8358/388/8355/8357
R-HSA-611105	Respiratory electron transport	25	-0.590845	-2.10732	0.00104638	0.0185287	0.0140772	54539/4714/4700/4694/27089/4695/29796/4716/4696/10975/4707/374291/4710/4713/55967/4701/4728/1337/6389/51079/1329/126328/1327/1340
R-HSA-8939211	ESR-mediated signaling	63	-0.431148	-1.95477	0.00117611	0.0203299	0.0154456	2033/8312/595/5296/208/5885/55970/1956/3065/5430/3315/4609/8358/3725/8355/8357/2353/4316
R-HSA-376176	Signaling by ROBO receptors	34	-0.535093	-2.10257	0.00134318	0.0222265	0.0168866	7314/5690/5695/5704/5693/387/7852/6923/5713/5879/6130/7316/6233/6194/9349
R-HSA-74160	Gene expression (Transcription)	297	-0.255886	-1.521	0.00134706	0.0222265	0.0168866	7314/5903/6648/4233/2064/2033/5690/5516/8289/8312/8797/5695/7175/595/4854/5728/2744/5704/208/2146/894/6241/79718/1956/1647/1337/1786/5970/5693/8795/4869/6597/3065/1329/6427/6046/6923/11065/23451/1327/5713/6662/5518/5430/1340/9021/3654/1499/3958/4609/5111/60/581/2821/8358/7316/3725/3164/3726/6233/1021/8355/8357/1277/2353/7057
R-HSA-216083	Integrin cell surface interactions	51	-0.459359	-1.99545	0.00143789	0.0231979	0.0176247	3673/3655/3685/961/3696/3688/3694/1281/1277/1278/1293/7057/2335/960
R-HSA-8874081	MET activates PTK2 signaling	22	-0.602635	-2.10133	0.00151977	0.023986	0.0182234	3688/3918/1281/1277/1278/2335
R-HSA-1266738	Developmental Biology	219	-0.282699	-1.59516	0.0016459	0.0254239	0.0193158	3872/5296/5704/208/2146/3673/79718/1956/5970/3728/2886/5693/3875/6597/6774/387/3685/7852/1050/3688/6923/5713/6662/5430/5879/1499/1969/4609/60/6130/8358/3855/388/7316/3725/6233/6194/8355/8357/9349/1281/1293/100133941
R-HSA-3000178	ECM proteoglycans	37	-0.513279	-2.06634	0.00170826	0.0257122	0.0195349	3685/3688/3694/1462/351/1281/1277/1278/1293/2335
R-HSA-168249	Innate Immune System	349	-0.244907	-1.48339	0.00176853	0.0257122	0.0195349	387/3417/3685/961/715/7184/4179/976/5329/716/4282/5591/7128/1848/5713/966/5518/710/5879/4792/629/3146/598/975/226/3654/1499/3958/1604/1512/60/2821/3916/203068/7316/3725/330/6233/5315/351/1191/4069/730/2353/718/960/4680/5265
R-HSA-199991	Membrane Trafficking	40	-0.501933	-2.04019	0.00177081	0.0257122	0.0195349	208/7879/1956/7037/966/5879/1604/60/7316/6233/351/5265
R-HSA-1643685	Disease	387	-0.234987	-1.43536	0.00182471	0.0259753	0.0197348	3667/3459/8454/7048/7314/5903/6648/4233/3460/2064/7297/2033/6093/5690/5516/8312/5695/7175/595/4854/5728/4791/5296/5704/208/2146/894/7879/55970/79718/1956/1786/5970/824/7855/5693/5159/4869/5037/3955/6774/3417/3065/7852/2778/708/3688/6923/23476/11065/1848/5713/5518/3159/5430/710/5879/4792/3146/598/1499/1462/4609/60/6130/8358/203068/22943/7316/3725/3164/6233/6194/1021/8355/8357/351/9349/928/7057/718…
R-HSA-1912422	Pre-NOTCH Expression and Processing	21	-0.596274	-2.04847	0.00192946	0.0269383	0.0204664	3014/2033/595/4854/3955/488/8358/3725/8355/8357
R-HSA-211000	Gene Silencing by RNA	12	-0.695138	-2.03728	0.00217972	0.0293051	0.0222646	3014/5903/7175/5430/8358/8355/8357
R-HSA-5578749	Transcriptional regulation by small RNAs	12	-0.695138	-2.03728	0.00217972	0.0293051	0.0222646	3014/5903/7175/5430/8358/8355/8357
R-HSA-9711123	Cellular response to chemical stress	40	-0.494056	-2.00817	0.00237364	0.0312554	0.0237463	8454/7314/6648/5690/9817/5695/5704/79718/1337/5693/6774/1329/6647/1327/5713/1340/2876/7316/6233
R-HSA-1234174	Cellular response to hypoxia	20	-0.584304	-1.98048	0.00241589	0.0312554	0.0237463	7314/3091/2033/5690/5695/5704/5693/6923/5713/7316/6233
R-HSA-163200	Respiratory electron transport, ATP synthesis by chemiosmotic coupling, and heat production by uncoupling proteins.	27	-0.549593	-2.01327	0.00245394	0.0312554	0.0237463	54539/4714/4700/4694/27089/4695/29796/4716/4696/10975/4707/374291/4710/4713/55967/4701/513/4728/1337/6389/51079/1329/126328/1327/1340
R-HSA-174084	Autodegradation of Cdh1 by Cdh1:APC/C	12	-0.689837	-2.02175	0.00252318	0.0315833	0.0239954	7314/5690/5695/5704/5693/11065/5713/7316/6233
R-HSA-9675108	Nervous system development	118	-0.335781	-1.7015	0.00284873	0.0348348	0.0264658	7314/4233/2064/6093/5690/5695/5296/5704/3673/1956/2886/5693/6597/387/3685/7852/3688/6923/5713/5879/1969/60/6130/388/7316/6233/6194/9349/1281/1293/100133941
R-HSA-5689603	UCH proteinases	17	-0.637491	-2.02681	0.00291627	0.0348348	0.0264658	7048/7314/5690/5695/5704/5693/5713/60/7316/6233
R-HSA-2467813	Separation of Sister Chromatids	29	-0.533265	-1.9694	0.00292689	0.0348348	0.0264658	7314/5903/5690/5516/5695/5704/5885/5693/11065/5713/5518/7316/6233
R-HSA-9006934	Signaling by Receptor Tyrosine Kinases	201	-0.282719	-1.56556	0.00314672	0.036113	0.0274369	5296/208/3673/1956/3728/2886/5159/6774/387/3685/3688/1848/5518/5430/5879/1499/3315/3918/60/581/7316/3726/6233/1281/1277/1278/2353/1293/7057/1958/2335/7060
R-HSA-2173793	Transcriptional activity of SMAD2/SMAD3:SMAD4 heterotrimer	16	-0.627484	-1.96245	0.00318518	0.036113	0.0274369	7314/3065/4609/7316/3726/6233
R-HSA-2022090	Assembly of collagen fibrils and other multimeric structures	29	-0.525757	-1.94167	0.0032323	0.036113	0.0274369	3918/1281/1277/1278/1293/4316
R-HSA-422475	Axon guidance	114	-0.337841	-1.7067	0.00323326	0.036113	0.0274369	7314/4233/2064/6093/5690/5695/5296/5704/3673/1956/2886/5693/387/3685/7852/3688/6923/5713/5879/1969/60/6130/388/7316/6233/6194/9349/1281/1293/100133941
R-HSA-168273	Influenza Viral RNA Transcription and Replication	13	-0.697015	-2.09088	0.00338177	0.0368088	0.0279655	5903/7175/5430/6130/6233/6194/9349
R-HSA-6807070	PTEN Regulation	35	-0.491106	-1.95859	0.00339695	0.0368088	0.0279655	207/7314/5690/5695/5728/5704/208/2146/5693/3065/5713/7316/3725/6233/1958
R-HSA-170834	Signaling by TGF-beta Receptor Complex	22	-0.572548	-1.99642	0.00360089	0.0384448	0.0292085	7048/7314/387/3065/4609/7316/3726/6233
R-HSA-168255	Influenza Infection	17	-0.629464	-2.00129	0.00389694	0.0406342	0.0308719	5903/7175/5430/6130/6233/6194/9349
R-HSA-2555396	Mitotic Metaphase and Anaphase	32	-0.506512	-1.95511	0.00397387	0.0406342	0.0308719	7314/5903/5690/5516/5695/5704/5885/5693/11065/5713/5518/7316/6233
R-HSA-68882	Mitotic Anaphase	32	-0.506512	-1.95511	0.00397387	0.0406342	0.0308719	7314/5903/5690/5516/5695/5704/5885/5693/11065/5713/5518/7316/6233
R-HSA-8957275	Post-translational protein phosphorylation	23	-0.582307	-2.03427	0.00415353	0.0418815	0.0318195	7184/1462/351/718/2335/5265
R-HSA-75815	Ubiquitin-dependent degradation of Cyclin D	14	-0.667929	-2.05165	0.00437288	0.0434892	0.0330409	7314/5690/5695/595/5704/5693/5713/7316/6233
R-HSA-1234176	Oxygen-dependent proline hydroxylation of Hypoxia-inducible Factor Alpha	15	-0.657323	-2.03156	0.00449761	0.0438573	0.0333206	7314/3091/5690/5695/5704/5693/6923/5713/7316/6233
R-HSA-5687128	MAPK6/MAPK4 signaling	25	-0.545556	-1.94579	0.00453071	0.0438573	0.0333206	7314/5690/2118/5695/5704/5693/5713/5879/3315/4609/7316/3725/6233
R-HSA-450408	AUF1 (hnRNP D0) binds and destabilizes mRNA	13	-0.686001	-2.05784	0.00476641	0.0449946	0.0341847	7314/5690/5695/5704/5693/5713/3315/7316/6233
R-HSA-195721	Signaling by WNT	96	-0.342149	-1.68357	0.00477215	0.0449946	0.0341847	3014/8549/4041/207/6422/8454/7314/2033/5690/5516/8312/5695/5704/208/55970/7855/5693/6597/387/3065/5713/6662/5518/5879/1499/4609/8358/22943/7316/6233/8355/8357/6423
R-HSA-1912408	Pre-NOTCH Transcription and Translation	18	-0.609364	-1.97656	0.00488816	0.0454975	0.0345667	3014/2033/595/4854/8358/3725/8355/8357
R-HSA-8939236	RUNX1 regulates transcription of genes involved in differentiation of HSCs	26	-0.51648	-1.87062	0.00495906	0.0455731	0.0346242	3014/7314/5690/5695/5704/5693/5713/8358/7316/6233/8355/8357
R-HSA-2173796	SMAD2/SMAD3:SMAD4 heterotrimer regulates transcription	15	-0.651244	-2.01278	0.00520632	0.0464009	0.0352531	6667/4089/7314/3065/4609/7316/3726/6233
R-HSA-5663220	RHO GTPases Activate Formins	17	-0.617796	-1.9642	0.00523892	0.0464009	0.0352531	5903/5516/387/3688/5518/5879/60/388
R-HSA-1474290	Collagen formation	33	-0.491758	-1.9113	0.00524087	0.0464009	0.0352531	3918/1281/1277/1278/1293/4316
R-HSA-174178	APC/C:Cdh1 mediated degradation of Cdc20 and other APC/C:Cdh1 targeted proteins in late mitosis/early G1	19	-0.586583	-1.94075	0.00570963	0.0493475	0.0374918	7314/5690/5695/5704/5693/11065/5713/7316/6233
R-HSA-201722	Formation of the beta-catenin:TCF transactivating complex	18	-0.603682	-1.95813	0.00570963	0.0493475	0.0374918	8085/3014/2033/6597/3065/1499/4609/8358/8355/8357
R-HSA-195253	Degradation of beta-catenin by the destruction complex	25	-0.536089	-1.91202	0.00585037	0.0499691	0.037964	8454/7314/5690/5516/8312/5695/5704/5693/3065/5713/5518/1499/7316/6233
R-HSA-4641258	Degradation of DVL	12	-0.652794	-1.91318	0.00624372	0.0527086	0.0400454	7314/5690/5695/5704/5693/5713/7316/6233
R-HSA-186797	Signaling by PDGF	34	-0.488586	-1.91983	0.00632189	0.0527551	0.0400807	5296/2886/5159/6774/1281/1293/7057/7060
R-HSA-69206	G1/S Transition	53	-0.415435	-1.80725	0.00642145	0.0528254	0.0401341	207/8454/7314/5690/5516/5695/595/5704/208/6241/5693/4173/7465/3065/5713/5518/4609/4176/5111/7316/6233
R-HSA-180585	Vif-mediated degradation of APOBEC3G	13	-0.672813	-2.01828	0.00647584	0.0528254	0.0401341	7314/5690/5695/5704/5693/6923/5713/7316/6233
R-HSA-5358346	Hedgehog ligand biogenesis	12	-0.647029	-1.89629	0.00688409	0.0549214	0.0417266	7314/5690/5695/5704/5693/5713/7316/6233
R-HSA-5387390	Hh mutants abrogate ligand secretion	12	-0.647029	-1.89629	0.00688409	0.0549214	0.0417266	7314/5690/5695/5704/5693/5713/7316/6233
R-HSA-212436	Generic Transcription Pathway	279	-0.24621	-1.44229	0.00702986	0.0554748	0.042147	7314/6648/4233/2064/2033/5690/5516/8289/8312/8797/5695/595/4854/5728/2744/5704/208/2146/894/6241/79718/1956/1647/1337/5970/5693/8795/4869/6597/3065/1329/6046/6923/11065/1327/5713/6662/5518/5430/1340/9021/3654/1499/3958/4609/5111/581/2821/8358/7316/3725/3164/3726/6233/1021/8355/8357/1277/2353/7057
R-HSA-8948751	Regulation of PTEN stability and activity	16	-0.600891	-1.87928	0.00735414	0.0574098	0.0436171	207/7314/5690/5695/5728/5704/208/5693/5713/7316/6233
R-HSA-3214841	PKMTs methylate histone lysines	15	-0.632146	-1.95375	0.00750567	0.0579693	0.0440422	8085/58508/4791/2146/5970/8358/8355/8357
R-HSA-8948216	Collagen chain trimerization	17	-0.603114	-1.91752	0.0076249	0.0579882	0.0440565	1290/1281/1277/1278/1293
R-HSA-9006931	Signaling by Nuclear Receptors	75	-0.358208	-1.67584	0.00766786	0.0579882	0.0440565	2033/8312/595/5296/208/5885/55970/79718/1956/3065/5430/3315/4609/8358/3725/8355/8357/2353/4316
R-HSA-5250913	Positive epigenetic regulation of rRNA expression	15	-0.628597	-1.94278	0.00783438	0.0585581	0.0444896	3014/84172/2033/3065/23451/60/8358/8355/8357
R-HSA-174154	APC/C:Cdc20 mediated degradation of Securin	14	-0.644265	-1.97896	0.00790454	0.0585581	0.0444896	7314/5690/5695/5704/5693/11065/5713/7316/6233
R-HSA-2559583	Cellular Senescence	61	-0.385408	-1.7344	0.00808138	0.0586982	0.044596	2146/5970/6774/11065/2114/3159/8358/7316/3725/6233/1021/8355/8357/2353
R-HSA-453279	Mitotic G1 phase and G1/S transition	67	-0.377397	-1.74214	0.00808515	0.0586982	0.044596	207/8454/7314/5690/5516/5695/595/5704/208/894/6241/5693/4173/7465/3065/5713/5518/4609/4176/5111/7316/6233/1021
R-HSA-977606	Regulation of Complement cascade	30	-0.482374	-1.80376	0.00830455	0.0596941	0.0453526	715/4179/716/966/710/629/975/1604/1191/730/718
R-HSA-5619115	Disorders of transmembrane transporters	19	-0.573701	-1.89813	0.00869297	0.0613983	0.0466474	7314/5903/5690/5695/7175/5704/5693/5713/7316/6233
R-HSA-73857	RNA Polymerase II Transcription	284	-0.245917	-1.44486	0.00871077	0.0613983	0.0466474	7314/6648/4233/2064/2033/5690/5516/8289/8312/8797/5695/595/4854/5728/2744/5704/208/2146/894/6241/79718/1956/1647/1337/5970/5693/8795/4869/6597/3065/1329/6427/6046/6923/11065/1327/5713/6662/5518/5430/1340/9021/3654/1499/3958/4609/5111/581/2821/8358/7316/3725/3164/3726/6233/1021/8355/8357/1277/2353/7057
R-HSA-8936459	RUNX1 regulates genes involved in megakaryocyte differentiation and platelet function	16	-0.591751	-1.85069	0.00883553	0.0616788	0.0468605	8085/58508/3014/2033/3065/8358/8355/8357/7057
R-HSA-194315	Signaling by Rho GTPases	85	-0.338175	-1.6394	0.0093108	0.0637742	0.0484525	5756/5903/6093/5516/7171/5296/7879/3728/2886/7037/387/708/3688/5518/5879/9235/1499/1969/60/8358/388/8355/2316/8357
R-HSA-1650814	Collagen biosynthesis and modifying enzymes	21	-0.547606	-1.88127	0.00938289	0.0637742	0.0484525	871/1281/1277/1278/1293
R-HSA-3247509	Chromatin modifying enzymes	42	-0.452265	-1.85962	0.00948708	0.0637742	0.0484525	8085/58508/3014/2033/8289/595/4791/2146/79718/5970/6597/3065/60/8358/8355/8357
R-HSA-4839726	Chromatin organization	42	-0.452265	-1.85962	0.00948708	0.0637742	0.0484525	8085/58508/3014/2033/8289/595/4791/2146/79718/5970/6597/3065/60/8358/8355/8357
R-HSA-76009	Platelet Aggregation (Plug Formation)	13	-0.658387	-1.97501	0.0095799	0.0638074	0.0484777	6850/207/1277/1278/2335
R-HSA-168164	Toll Like Receptor 3 (TLR3) Cascade	62	-0.380449	-1.72329	0.00986548	0.0639495	0.0485856	9261/8454/7314/5516/4791/3665/5970/1848/5518/4792/3146/3654/7316/3725/330/6233/351/2353
R-HSA-3214847	HATs acetylate histones	10	-0.676279	-1.86408	0.0100194	0.0643725	0.0489071	2033/60/8358/8355/8357
R-HSA-8878171	Transcriptional regulation by RUNX1	70	-0.359855	-1.67727	0.0109106	0.0694832	0.0527899	7314/2033/5690/8289/8312/5695/595/5704/894/5693/6597/3065/5713/9021/3958/8358/7316/6233/1021/8355/8357/7057
R-HSA-212165	Epigenetic regulation of gene expression	25	-0.507223	-1.80907	0.011554	0.0729411	0.0554171	3014/84172/2033/2146/1786/3065/23451/60/8358/8355/8357
R-HSA-68875	Mitotic Prophase	18	-0.576069	-1.86856	0.0118892	0.0744099	0.0565329	3014/5903/5516/7175/5518/8358/8355/8357
R-HSA-8852276	The role of GTSE1 in G2/M progression after G2 checkpoint	16	-0.581975	-1.82012	0.0120162	0.074562	0.0566486	7314/5690/5695/5704/5693/5713/7316/6233
R-HSA-169911	Regulation of Apoptosis	11	-0.670004	-1.88739	0.0125885	0.0754097	0.0572926	7314/5690/5695/5704/5693/5713/7316/6233
R-HSA-211733	Regulation of activated PAK-2p34 by proteasome mediated degradation	11	-0.670004	-1.88739	0.0125885	0.0754097	0.0572926	7314/5690/5695/5704/5693/5713/7316/6233
R-HSA-5362768	Hh mutants are degraded by ERAD	11	-0.670004	-1.88739	0.0125885	0.0754097	0.0572926	7314/5690/5695/5704/5693/5713/7316/6233
R-HSA-5678895	Defective CFTR causes cystic fibrosis	11	-0.670004	-1.88739	0.0125885	0.0754097	0.0572926	7314/5690/5695/5704/5693/5713/7316/6233
R-HSA-977225	Amyloid fiber formation	21	-0.535055	-1.83815	0.0126722	0.0754097	0.0572926	8358/7316/6233/8355/8357/351/4069
R-HSA-8951664	Neddylation	26	-0.486	-1.76022	0.0131179	0.0774275	0.0588256	8454/7314/3091/5690/9817/5695/5704/5693/6923/5713/9021/7316/6233
R-HSA-209560	NF-kB is activated and signals survival	11	-0.667469	-1.88025	0.0136832	0.0801128	0.0608657	7314/5970/4792/3654/7316/6233
R-HSA-5668914	Diseases of metabolism	20	-0.524718	-1.77852	0.013982	0.0812072	0.0616972	7314/4854/3955/3417/1462/7316/6233/7057
R-HSA-4641257	Degradation of AXIN	14	-0.612355	-1.88095	0.0143318	0.0820386	0.0623289	7314/5690/8312/5695/5704/5693/5713/7316/6233
R-HSA-5607761	Dectin-1 mediated noncanonical NF-kB signaling	18	-0.56496	-1.83253	0.0145771	0.0820386	0.0623289	8454/7314/5690/5695/4791/5704/5970/5693/5713/7316/6233
R-HSA-5250924	B-WICH complex positively regulates rRNA expression	13	-0.631356	-1.89392	0.0155972	0.0869441	0.0660558	3014/84172/2033/23451/60/8358/8355/8357
R-HSA-174113	SCF-beta-TrCP mediated degradation of Emi1	14	-0.606138	-1.86185	0.0158871	0.0869441	0.0660558	8454/7314/5690/5695/5704/5693/5713/7316/6233
R-HSA-349425	Autodegradation of the E3 ubiquitin ligase COP1	13	-0.628763	-1.88614	0.0160275	0.0869441	0.0660558	7314/5690/5695/5704/5693/5713/7316/6233
R-HSA-174184	Cdc20:Phospho-APC/C mediated degradation of Cyclin A	16	-0.571494	-1.78734	0.016057	0.0869441	0.0660558	7314/5690/5695/5704/5693/11065/5713/7316/6233
R-HSA-179419	APC:Cdc20 mediated degradation of cell cycle proteins prior to satisfation of the cell cycle checkpoint	16	-0.571494	-1.78734	0.016057	0.0869441	0.0660558	7314/5690/5695/5704/5693/11065/5713/7316/6233
R-HSA-195258	RHO GTPase Effectors	53	-0.387545	-1.68592	0.0163079	0.0869441	0.0660558	387/3688/5518/5879/1499/60/8358/388/8355/2316/8357
R-HSA-427413	NoRC negatively regulates rRNA expression	15	-0.599893	-1.85407	0.0164068	0.0869441	0.0660558	3014/84172/1786/3065/8358/8355/8357
R-HSA-5250941	Negative epigenetic regulation of rRNA expression	15	-0.599893	-1.85407	0.0164068	0.0869441	0.0660558	3014/84172/1786/3065/8358/8355/8357
R-HSA-5619084	ABC transporter disorders	12	-0.601574	-1.76307	0.0166248	0.0870652	0.0661478	7314/5690/5695/5704/5693/5713/7316/6233
R-HSA-9716542	Signaling by Rho GTPases, Miro GTPases and RHOBTB3	87	-0.331921	-1.60802	0.0166695	0.0870652	0.0661478	5756/5903/6093/5516/7171/5296/7879/3728/2886/7037/387/708/3688/5518/5879/9235/1499/1969/60/8358/388/8355/2316/8357
R-HSA-166166	MyD88-independent TLR4 cascade	66	-0.355152	-1.63225	0.0173826	0.0895021	0.0679993	9261/8454/7314/5516/4791/3665/5970/1848/5518/4792/3146/3654/7316/3725/330/6233/351/2353
R-HSA-937061	TRIF(TICAM1)-mediated TLR4 signaling	66	-0.355152	-1.63225	0.0173826	0.0895021	0.0679993	9261/8454/7314/5516/4791/3665/5970/1848/5518/4792/3146/3654/7316/3725/330/6233/351/2353
R-HSA-1834949	Cytosolic sensors of pathogen-associated DNA	30	-0.454271	-1.69868	0.0183498	0.0938168	0.0712773	7314/2033/4791/3665/5970/5591/4792/1499/7316/6233
R-HSA-8932339	ROS sensing by NFE2L2	15	-0.592743	-1.83197	0.018609	0.0944766	0.0717786	7314/5690/9817/5695/5704/5693/5713/7316/6233
R-HSA-8848021	Signaling by PTK6	23	-0.519869	-1.81614	0.0192191	0.0954106	0.0724882	207/7314/2064/3091/595/1956/6774/387/5879/9021/7316/6233
R-HSA-9006927	Signaling by Non-Receptor Tyrosine Kinases	23	-0.519869	-1.81614	0.0192191	0.0954106	0.0724882	207/7314/2064/3091/595/1956/6774/387/5879/9021/7316/6233
R-HSA-2565942	Regulation of PLK1 Activity at G2/M Transition	13	-0.617155	-1.85132	0.0192544	0.0954106	0.0724882	8454/7314/5518/203068/7316/6233
R-HSA-157118	Signaling by NOTCH	73	-0.342819	-1.6032	0.0194501	0.0954106	0.0724882	3014/207/8454/7314/3091/2033/5690/5695/595/4854/5704/79718/1956/5693/3955/3065/488/5713/4609/8358/7316/3725/6233/8355/8357
R-HSA-5689880	Ub-specific processing proteases	47	-0.382211	-1.61639	0.0207462	0.101085	0.0767996	7314/3091/5690/9817/8312/5695/5728/5704/5693/5713/4792/90865/4609/7316/330/6233
R-HSA-68867	Assembly of the pre-replicative complex	19	-0.534849	-1.76958	0.0209868	0.101576	0.0771725	7314/5690/5695/5704/5693/4173/5713/4176/7316/6233
R-HSA-5676590	NIK-->noncanonical NF-kB signaling	17	-0.548926	-1.74523	0.0215822	0.102056	0.0775372	8454/7314/5690/5695/4791/5704/5693/5713/7316/6233
R-HSA-450531	Regulation of mRNA stability by proteins that bind AU-rich elements	20	-0.505565	-1.7136	0.0216326	0.102056	0.0775372	207/9261/7314/5690/5695/5704/5693/5713/3315/7316/6233
R-HSA-5688426	Deubiquitination	66	-0.348993	-1.60395	0.0216483	0.102056	0.0775372	7048/7314/3091/2033/5690/9817/8312/57506/5695/5728/5704/5693/387/7128/5713/4792/90865/4609/60/7316/330/6233
R-HSA-8854050	FBXL7 down-regulates AURKA during mitotic entry and in early mitosis	15	-0.585068	-1.80825	0.0219124	0.102635	0.0779768	8454/7314/5690/5695/5704/5693/5713/7316/6233
R-HSA-69242	S Phase	58	-0.370444	-1.65315	0.0226491	0.104946	0.0797325	207/8454/7314/5690/5695/595/5704/208/5885/5693/4173/7465/11065/5713/4609/4176/5111/7316/6233
R-HSA-114604	GPVI-mediated activation cascade	22	-0.488712	-1.70409	0.022784	0.104946	0.0797325	5296/387/5879/388/1277/1278
R-HSA-6799198	Complex I biogenesis	17	-0.544476	-1.73109	0.0228394	0.104946	0.0797325	54539/4714/4700/4694/4695/4716/4696/4707/374291/4710/4713/55967/4701/4728/51079/126328
R-HSA-5213460	RIPK1-mediated regulated necrosis	14	-0.587965	-1.80603	0.0234461	0.105608	0.080236	7314/8797/8743/8795/7316/330/6233
R-HSA-5675482	Regulation of necroptotic cell death	14	-0.587965	-1.80603	0.0234461	0.105608	0.080236	7314/8797/8743/8795/7316/330/6233
R-HSA-193639	p75NTR signals via NF-kB	13	-0.607519	-1.82242	0.0235655	0.105608	0.080236	7314/5970/4792/3654/7316/6233
R-HSA-9707587	Regulation of HMOX1 expression and activity	18	-0.534745	-1.73452	0.0238958	0.105985	0.0805224	8454/7314/5690/9817/5695/5704/5693/5713/7316/6233
R-HSA-73772	RNA Polymerase I Promoter Escape	11	-0.639055	-1.80021	0.0239814	0.105985	0.0805224	3014/84172/8358/8355/8357
R-HSA-9616222	Transcriptional regulation of granulopoiesis	24	-0.49094	-1.73758	0.0242553	0.105985	0.0805224	1051/3014/2033/6774/1050/4609/8358/8355/8357
R-HSA-168142	Toll Like Receptor 10 (TLR10) Cascade	55	-0.364424	-1.61854	0.0246715	0.105985	0.0805224	9261/8454/7314/5516/4791/5970/1848/5518/4792/3146/3654/7316/3725/6233/351/2353
R-HSA-168176	Toll Like Receptor 5 (TLR5) Cascade	55	-0.364424	-1.61854	0.0246715	0.105985	0.0805224	9261/8454/7314/5516/4791/5970/1848/5518/4792/3146/3654/7316/3725/6233/351/2353
R-HSA-975871	MyD88 cascade initiated on plasma membrane	55	-0.364424	-1.61854	0.0246715	0.105985	0.0805224	9261/8454/7314/5516/4791/5970/1848/5518/4792/3146/3654/7316/3725/6233/351/2353
R-HSA-2173782	Binding and Uptake of Ligands by Scavenger Receptors	16	-0.546554	-1.70934	0.025006	0.10679	0.0811339	7184/4035/1281/1277/1278
R-HSA-176408	Regulation of APC/C activators between G1/S and early anaphase	21	-0.504616	-1.73358	0.0258705	0.109836	0.0834482	8454/7314/5690/5695/5704/5693/11065/5713/7316/6233
R-HSA-176814	Activation of APC/C and APC/C:Cdc20 mediated degradation of mitotic proteins	19	-0.522369	-1.72829	0.0268048	0.112566	0.0855219	7314/5690/5695/5704/5693/11065/5713/7316/6233
R-HSA-1640170	Cell Cycle	146	-0.266306	-1.38924	0.0271804	0.113408	0.0861617	8454/7314/5903/2033/5690/5516/5695/7175/595/5704/208/5885/894/6241/5693/4869/4173/7465/3065/11065/5713/5518/5430/4609/4176/5111/8358/203068/7316/6233/1021/8355/8357
R-HSA-9705462	Inactivation of CSF3 (G-CSF) signaling	17	-0.531274	-1.68911	0.0282872	0.115938	0.0880837	3716/6850/7314/7297/6774/6923/9021/7316/6233
R-HSA-3000480	Scavenging by Class A Receptors	11	-0.633311	-1.78403	0.0283815	0.115938	0.0880837	7184/1281/1277/1278
R-HSA-3769402	Deactivation of the beta-catenin transactivating complex	16	-0.538564	-1.68435	0.0284255	0.115938	0.0880837	6657/8085/207/7314/208/3065/6662/1499/7316/6233
R-HSA-9604323	Negative regulation of NOTCH4 signaling	16	-0.540825	-1.69142	0.0284255	0.115938	0.0880837	207/8454/7314/5690/5695/5704/5693/5713/7316/6233
R-HSA-5357905	Regulation of TNFR1 signaling	16	-0.535554	-1.67494	0.0292804	0.117445	0.089229	7314/7128/7316/330/6233
R-HSA-8941858	Regulation of RUNX3 expression and activity	16	-0.537024	-1.67953	0.0292804	0.117445	0.089229	7314/2033/5690/5695/5704/5693/5713/7316/6233
R-HSA-9031628	NGF-stimulated transcription	16	-0.535813	-1.67575	0.0292804	0.117445	0.089229	1959/2033/3398/3726/2353/1958
R-HSA-166658	Complement cascade	37	-0.407469	-1.64038	0.0298814	0.119197	0.0905602	715/4179/716/966/710/629/975/1604/1191/730/718
R-HSA-69541	Stabilization of p53	17	-0.527666	-1.67764	0.0308016	0.122196	0.0928388	7314/5690/5695/5704/5693/5713/7316/6233
R-HSA-209543	p75NTR recruits signalling complexes	10	-0.615136	-1.69555	0.032422	0.125874	0.0956327	7314/3654/7316/6233
R-HSA-162909	Host Interactions of HIV factors	30	-0.431766	-1.61452	0.0331303	0.127939	0.0972021	7314/5903/5690/5695/7175/5704/5693/4869/6923/5713/3159/5879/7316/6233
R-HSA-983168	Antigen processing: Ubiquitination & Proteasome degradation	32	-0.42343	-1.63442	0.0334973	0.128672	0.0977586	8454/7314/5690/9817/5695/5704/5693/6923/11065/5713/9021/7316/6233
R-HSA-176409	APC/C:Cdc20 mediated degradation of mitotic proteins	18	-0.522552	-1.69497	0.034285	0.131005	0.099531	7314/5690/5695/5704/5693/11065/5713/7316/6233
R-HSA-69601	Ubiquitin Mediated Degradation of Phosphorylated Cdc25A	14	-0.564306	-1.73336	0.0372902	0.140273	0.106572	7314/5690/5695/5704/5693/5713/7316/6233
R-HSA-69610	p53-Independent DNA Damage Response	14	-0.564306	-1.73336	0.0372902	0.140273	0.106572	7314/5690/5695/5704/5693/5713/7316/6233
R-HSA-69613	p53-Independent G1/S DNA damage checkpoint	14	-0.564306	-1.73336	0.0372902	0.140273	0.106572	7314/5690/5695/5704/5693/5713/7316/6233
R-HSA-168927	TICAM1, RIP1-mediated IKK complex recruitment	12	-0.55688	-1.63208	0.0428989	0.15936	0.121074	7314/7316/330/6233
R-HSA-6804114	TP53 Regulates Transcription of Genes Involved in G2 Cell Cycle Arrest	13	-0.574139	-1.72228	0.0430228	0.15936	0.121074	7027/5934/2033/1647/5111/581
R-HSA-382556	ABC-family proteins mediated transport	14	-0.548163	-1.68377	0.0453287	0.167049	0.126916	23/7314/5690/5695/5704/5693/5713/7316/6233
R-HSA-182971	EGFR downregulation	10	-0.600262	-1.65455	0.0464245	0.170223	0.129327	10252/7314/1956/7316/6233
R-HSA-69275	G2/M Transition	38	-0.387341	-1.56649	0.0468562	0.170943	0.129874	8454/7314/2033/5690/5516/5695/5704/5693/7465/5713/5518/203068/7316/6233
R-HSA-69656	Cyclin A:Cdk2-associated events at S phase entry	37	-0.38898	-1.56594	0.0479659	0.174116	0.132285	207/8454/7314/5690/5695/595/5704/208/5693/7465/5713/4609/7316/6233
R-HSA-1280215	Cytokine Signaling in Immune system	366	-0.20164	-1.22919	0.0488511	0.17569	0.13348	4282/3688/6923/6647/1848/5713/5518/2537/4792/90865/3146/598/3597/9021/2920/3654/9235/4609/51330/8358/4170/7316/3725/10581/6364/330/3726/6233/8355/2316/8357/351/1278/2353/4312/1958/2335/960
R-HSA-193704	p75 NTR receptor-mediated signalling	28	-0.423557	-1.55881	0.0488833	0.17569	0.13348	5970/387/3065/5879/4792/3654/7316/6233
R-HSA-5696399	Global Genome Nucleotide Excision Repair (GG-NER)	18	-0.505136	-1.63848	0.0522038	0.185527	0.140954	7314/5111/60/7316/6233
R-HSA-5696397	Gap-filling DNA repair synthesis and ligation in GG-NER	10	-0.588735	-1.62278	0.0523872	0.185527	0.140954	7314/5111/7316/6233
R-HSA-445989	TAK1 activates NFkB by phosphorylation and activation of IKKs complex	23	-0.468728	-1.63748	0.0529911	0.186755	0.141887	7314/4791/5970/4792/3146/3654/7316/6233/351
R-HSA-68827	CDT1 association with the CDC6:ORC:origin complex	13	-0.546763	-1.64016	0.053447	0.187452	0.142417	7314/5690/5695/5704/5693/5713/7316/6233
R-HSA-5610783	Degradation of GLI2 by the proteasome	18	-0.500212	-1.62251	0.0547095	0.190302	0.144582	8454/7314/5690/5695/5704/5693/5713/7316/6233
R-HSA-453274	Mitotic G2-G2/M phases	40	-0.37386	-1.51961	0.0547838	0.190302	0.144582	8454/7314/2033/5690/5516/5695/5704/5693/7465/5713/5518/203068/7316/6233
R-HSA-69052	Switching of origins to a post-replicative state	27	-0.422879	-1.54909	0.0559714	0.191959	0.145841	8454/7314/5690/5695/5704/5693/4173/11065/5713/4176/7316/6233
R-HSA-168138	Toll Like Receptor 9 (TLR9) Cascade	61	-0.32629	-1.46836	0.0560541	0.191959	0.145841	9261/8454/7314/5516/4791/3665/5970/1848/5518/4792/3146/3654/7316/3725/6233/351/2353
R-HSA-975155	MyD88 dependent cascade initiated on endosome	61	-0.32629	-1.46836	0.0560541	0.191959	0.145841	9261/8454/7314/5516/4791/3665/5970/1848/5518/4792/3146/3654/7316/3725/6233/351/2353
R-HSA-1295596	Spry regulation of FGF signaling	12	-0.535376	-1.56906	0.0567591	0.193461	0.146982	5781/7314/5516/5518/7316/6233
R-HSA-69239	Synthesis of DNA	35	-0.381965	-1.52332	0.057028	0.193469	0.146988	8454/7314/5690/5695/5704/5693/4173/11065/5713/4176/5111/7316/6233
R-HSA-180534	Vpu mediated degradation of CD4	13	-0.540221	-1.62054	0.0595303	0.199166	0.151316	7314/5690/5695/5704/5693/5713/7316/6233
R-HSA-9674555	Signaling by CSF3 (G-CSF)	21	-0.461356	-1.58496	0.0608641	0.202694	0.153997	3716/6850/5781/7314/7297/6774/6923/9021/7316/6233
R-HSA-4641263	Regulation of FZD by ubiquitination	12	-0.524687	-1.53773	0.0628249	0.207625	0.157743	8549/4041/7314/7855/7316/6233
R-HSA-69202	Cyclin E associated events during G1/S transition	36	-0.392656	-1.56944	0.0642609	0.207625	0.157743	207/8454/7314/5690/5695/595/5704/208/5693/7465/5713/4609/7316/6233
R-HSA-68949	Orc1 removal from chromatin	24	-0.445689	-1.57742	0.0643171	0.207625	0.157743	8454/7314/5690/5695/5704/5693/4173/5713/4176/7316/6233
R-HSA-69002	DNA Replication Pre-Initiation	23	-0.458665	-1.60233	0.0644928	0.207625	0.157743	7314/5690/5695/5704/5693/4173/5713/4176/7316/6233
R-HSA-450282	MAPK targets/ Nuclear events mediated by MAP kinases	20	-0.442371	-1.49941	0.0646082	0.207625	0.157743	9261/5516/1848/5518/3725/2353
R-HSA-168181	Toll Like Receptor 7/8 (TLR7/8) Cascade	62	-0.318451	-1.44246	0.0646789	0.207625	0.157743	9261/8454/7314/5516/4791/3665/5970/1848/5518/4792/3146/3654/7316/3725/6233/351/2353
R-HSA-1474165	Reproduction	27	-0.417439	-1.52917	0.0657765	0.207625	0.157743	5885/8358/8355/8357/928
R-HSA-5658442	Regulation of RAS by GAPs	19	-0.474415	-1.56963	0.0672382	0.210391	0.159845	7314/5690/5695/5704/5693/5713/7316/6233
R-HSA-198725	Nuclear Events (kinase and transcription factor activation)	27	-0.415389	-1.52165	0.0674106	0.210391	0.159845	1959/9261/2033/5516/3398/1848/5518/3726/2353/1958
R-HSA-174143	APC/C-mediated degradation of cell cycle proteins	27	-0.412494	-1.51105	0.0679348	0.210391	0.159845	8454/7314/5690/5695/5704/5693/11065/5713/7316/6233
R-HSA-453276	Regulation of mitotic cell cycle	27	-0.412494	-1.51105	0.0679348	0.210391	0.159845	8454/7314/5690/5695/5704/5693/11065/5713/7316/6233
R-HSA-975138	TRAF6 mediated induction of NFkB and MAP kinases upon TLR7/8 or 9 activation	60	-0.330485	-1.49475	0.068263	0.210391	0.159845	1848/5518/4792/3146/3654/7316/3725/6233/351/2353
R-HSA-1169091	Activation of NF-kappaB in B cells	25	-0.409998	-1.46231	0.0686813	0.210391	0.159845	8454/7314/5690/5695/5704/5970/5693/5713/4792/7316/6233
R-HSA-450294	MAP kinase activation	41	-0.3662	-1.4935	0.0686813	0.210391	0.159845	1848/5518/3654/7316/3725/6233/2353
R-HSA-8943724	Regulation of PTEN gene transcription	18	-0.442191	-1.43431	0.0694444	0.211835	0.160942	2146/3065/3725/1958
R-HSA-5689896	Ovarian tumor domain proteases	20	-0.420232	-1.42437	0.0702703	0.212264	0.161268	7314/57506/5728/387/7128/7316/6233
R-HSA-5610785	GLI3 is processed to GLI3R by the proteasome	19	-0.467073	-1.54534	0.0705791	0.212264	0.161268	8454/7314/5690/5695/5704/5693/5713/7316/6233
R-HSA-8878166	Transcriptional regulation by RUNX2	53	-0.332933	-1.44835	0.0723439	0.21512	0.163438	207/8454/7314/5690/5695/595/5704/208/5693/5713/6662/3958/581/7316/6233/1277
R-HSA-5357956	TNFR1-induced NFkappaB signaling pathway	16	-0.473742	-1.48162	0.0725957	0.21512	0.163438	7314/7128/7316/330/6233
R-HSA-69306	DNA Replication	38	-0.365781	-1.4793	0.0731707	0.215943	0.164063	8454/7314/5690/5695/5704/5693/4173/11065/5713/4176/5111/7316/6233
R-HSA-5696400	Dual Incision in GG-NER	16	-0.471598	-1.47492	0.0743139	0.217001	0.164867	7314/5111/7316/6233
R-HSA-168643	Nucleotide-binding domain, leucine rich repeat containing receptor (NLR) signaling pathways	36	-0.369871	-1.47838	0.0752688	0.217001	0.164867	4791/5970/7128/598/3654/7316/330/6233/351
R-HSA-110314	Recognition of DNA damage by PCNA-containing replication complex	11	-0.574834	-1.6193	0.0756152	0.217001	0.164867	7314/5111/7316/6233
R-HSA-166058	MyD88:MAL(TIRAP) cascade initiated on plasma membrane	67	-0.293471	-1.35472	0.0760563	0.217001	0.164867	1848/5518/4792/3146/3654/7316/3725/6233/351/2353
R-HSA-168179	Toll Like Receptor TLR1:TLR2 Cascade	67	-0.293471	-1.35472	0.0760563	0.217001	0.164867	1848/5518/4792/3146/3654/7316/3725/6233/351/2353
R-HSA-168188	Toll Like Receptor TLR6:TLR2 Cascade	67	-0.293471	-1.35472	0.0760563	0.217001	0.164867	1848/5518/4792/3146/3654/7316/3725/6233/351/2353
R-HSA-181438	Toll Like Receptor 2 (TLR2) Cascade	67	-0.293471	-1.35472	0.0760563	0.217001	0.164867	1848/5518/4792/3146/3654/7316/3725/6233/351/2353
R-HSA-1428517	The citric acid (TCA) cycle and respiratory electron transport	34	-0.368707	-1.44878	0.077957	0.219367	0.166664	54539/4714/4700/4694/3945/27089/4695/29796/4716/4696/3418/10975/6566/4707/374291/4710/4713/55967/4701/513/4728/1337/6389/51079/1329/126328/1327/1340
R-HSA-9012999	RHO GTPase cycle	45	-0.359384	-1.50654	0.0791076	0.221341	0.168164	5756/6093/7171/5296/7879/3728/2886/7037/387/708/3688/5879/9235/1969/60/388
R-HSA-5696398	Nucleotide Excision Repair	24	-0.435043	-1.53974	0.0798841	0.222206	0.168821	7314/2033/5430/5111/60/7316/6233
R-HSA-5357801	Programmed Cell Death	69	-0.292684	-1.35936	0.0803324	0.22237	0.168946	3606/207/7314/6093/5690/8797/5695/5704/208/8743/5693/8795/6774/708/5713/3146/598/1499/581/7316/330/6233
R-HSA-2500257	Resolution of Sister Chromatid Cohesion	18	-0.435197	-1.41162	0.0805556	0.22237	0.168946	9212/10403/1063/332/891/57122/11004/9126/983/8243/10735/5347/991/5903/5516/5885/5518
R-HSA-6785807	Interleukin-4 and Interleukin-13 signaling	87	-0.282938	-1.37072	0.0816901	0.223708	0.169962	6774/301/7184/3688/598/3597/9021/4609/4170/3726/1278/2353/4312/2335
R-HSA-1227986	Signaling by ERBB2	23	-0.417148	-1.45729	0.0819672	0.223708	0.169962	207/7314/2064/208/1956/2886/387/7316/6233
R-HSA-975110	TRAF6 mediated IRF7 activation in TLR7/8 or 9 signaling	10	-0.556567	-1.53411	0.082153	0.223708	0.169962	7314/3665/3654/7316/6233
R-HSA-5610780	Degradation of GLI1 by the proteasome	19	-0.456953	-1.51186	0.0822726	0.223708	0.169962	8454/7314/5690/5695/5704/5693/5713/7316/6233
R-HSA-6796648	TP53 Regulates Transcription of DNA Repair Genes	23	-0.441285	-1.54161	0.0833885	0.225578	0.171383	6923/5430/3725/2353
R-HSA-2129379	Molecules associated with elastic fibres	14	-0.472938	-1.4527	0.0835821	0.225578	0.171383	3685/3696/3688/3694/2335
R-HSA-5218859	Regulated Necrosis	26	-0.392558	-1.42179	0.0846995	0.227097	0.172537	3606/7314/8797/8743/8795/3146/581/7316/330/6233
R-HSA-4615885	SUMOylation of DNA replication proteins	10	-0.552483	-1.52286	0.0849858	0.227097	0.172537	7153/332/55706/57122/51588/6790/5903/7175/5111
R-HSA-6782210	Gap-filling DNA repair synthesis and ligation in TC-NER	21	-0.404117	-1.38832	0.0857909	0.227097	0.172537	7314/2033/5430/5111/7316/6233
R-HSA-69231	Cyclin D associated events in G1	34	-0.36398	-1.43021	0.0860215	0.227097	0.172537	8454/7314/5516/595/894/5518/7316/6233/1021
R-HSA-69236	G1 Phase	34	-0.36398	-1.43021	0.0860215	0.227097	0.172537	8454/7314/5516/595/894/5518/7316/6233/1021
R-HSA-2173789	TGF-beta receptor signaling activates SMADs	11	-0.56537	-1.59264	0.0871122	0.228841	0.173862	4089/7048/7314/7316/6233
R-HSA-3700989	Transcriptional Regulation by TP53	114	-0.263682	-1.33206	0.0873127	0.228841	0.173862	2033/5516/8797/5728/2744/208/1647/1337/8795/4869/3065/1329/6923/1327/5518/5430/1340/5111/581/2821/7316/3725/6233/2353
R-HSA-73887	Death Receptor Signalling	50	-0.326367	-1.40982	0.088	0.229813	0.174601	5970/8743/8795/387/3065/7128/5879/4792/3654/7316/330/6233
R-HSA-187577	SCF(Skp2)-mediated degradation of p27/p21	23	-0.406062	-1.41856	0.0901639	0.233782	0.177616	8454/7314/5690/5695/595/5704/5693/5713/7316/6233
R-HSA-373755	Semaphorin interactions	14	-0.49854	-1.53135	0.0911051	0.235382	0.178831	4233/2064/6093/387/3688/5879/388
R-HSA-1500931	Cell-Cell communication	33	-0.371526	-1.444	0.0943396	0.242016	0.183872	5781/5818/2318/5296/5819/3655/3728/961/3688/1499/3918/60/2316
R-HSA-2559585	Oncogene Induced Senescence	22	-0.397946	-1.3876	0.0943396	0.242016	0.183872	2114/7316/6233/1021
R-HSA-73893	DNA Damage Bypass	14	-0.463255	-1.42296	0.0955224	0.244188	0.185522	7314/5111/7316/6233
R-HSA-72203	Processing of Capped Intron-Containing Pre-mRNA	13	-0.502551	-1.50754	0.0969419	0.24631	0.187135	5903/7175/6427/23451/5430
R-HSA-162599	Late Phase of HIV Life Cycle	18	-0.461365	-1.4965	0.0982082	0.246544	0.187312	7314/5903/7175/6923/5430/7316/6233
R-HSA-109581	Apoptosis	60	-0.315294	-1.42604	0.0984817	0.246544	0.187312	207/7314/6093/5690/8797/5695/5704/208/8743/5693/8795/6774/708/5713/3146/598/1499/581/7316/6233
R-HSA-5693565	Recruitment and ATM-mediated phosphorylation of repair and signaling proteins at DNA double strand breaks	18	-0.421953	-1.36867	0.1	0.247782	0.188252	4683/10111/4361/11200/5599/7157/9656/472/51588/8314/25/3014/7314/7316/6233
R-HSA-5693606	DNA Double Strand Break Response	18	-0.421953	-1.36867	0.1	0.247782	0.188252	4683/10111/4361/11200/5599/7157/9656/472/51588/8314/25/3014/7314/7316/6233
R-HSA-190242	FGFR1 ligand binding and activation	14	0.570909	1.68748	0.00976485	0.0638674	0.0485233	2253/2255/2247/2250/26281/8074/2246/2248/27006/2254
R-HSA-5654219	Phospholipase C-mediated cascade: FGFR1	14	0.570909	1.68748	0.00976485	0.0638674	0.0485233	2253/2255/2247/2250/26281/8074/2246/2248/27006/2254
R-HSA-1839122	Signaling by activated point mutants of FGFR1	11	0.605236	1.66209	0.0145766	0.0820386	0.0623289	2253/2247/2250/26281/8074/2246
R-HSA-190373	FGFR1c ligand binding and activation	11	0.605236	1.66209	0.0145766	0.0820386	0.0623289	2253/2247/2250/26281/8074/2246
R-HSA-5621480	Dectin-2 family	11	0.592042	1.62585	0.0193224	0.0954106	0.0724882	26253/93978/4582/170482/4585/50856
R-HSA-5669034	TNFs bind their physiological receptors	24	0.468689	1.60825	0.0215576	0.102056	0.0775372	23495/356/944/608/3604/8741/7293/8744/8600/7292/939/8995/970/943/4049/10673/8740
R-HSA-5654689	PI-3K cascade:FGFR1	18	0.517083	1.62571	0.0234198	0.105608	0.080236	2253/2255/2247/2250/26281/8074/2246/2248/27006/2254
R-HSA-5576892	Phase 0 - rapid depolarisation	10	0.597065	1.57525	0.0243243	0.105985	0.0805224	59285/2258/816/2259/2257/783/9254/27092/2256/775
R-HSA-5576891	Cardiac conduction	14	0.530759	1.5688	0.0268235	0.112566	0.0855219	59285/8850/4842/2258/816/2259/2257/783/9254
R-HSA-190241	FGFR2 ligand binding and activation	17	0.508331	1.5779	0.0314679	0.122826	0.0933174	2253/2255/2247/2250/26281/8074/2246/2248/27006/2254/8823/8817
R-HSA-2033519	Activated point mutants of FGFR2	17	0.508331	1.5779	0.0314679	0.122826	0.0933174	2253/2255/2247/2250/26281/8074/2246/2248/27006/2254/8823/8817
R-HSA-5654221	Phospholipase C-mediated cascade; FGFR2	17	0.508331	1.5779	0.0314679	0.122826	0.0933174	2253/2255/2247/2250/26281/8074/2246/2248/27006/2254/8823/8817
R-HSA-5654695	PI-3K cascade:FGFR2	21	0.461584	1.5172	0.0413355	0.154688	0.117525	2253/2255/2247/2250/26281/8074/2246/2248/27006/2254/8823/8817
R-HSA-8963899	Plasma lipoprotein remodeling	10	0.561311	1.48092	0.0508475	0.181849	0.13816	337/84699/344
R-HSA-5654693	FRS-mediated FGFR1 signaling	20	0.447031	1.44608	0.0585443	0.197689	0.150194	2253/2255/2247/2250/26281/8074/2246/2248/27006/2254
R-HSA-5658623	FGFRL1 modulation of FGFR1 signaling	11	0.533711	1.46567	0.0589124	0.198011	0.150439	2253/2255/2247/2250/8074/2248/27006
R-HSA-1839130	Signaling by activated point mutants of FGFR3	12	0.519779	1.45555	0.0656489	0.207625	0.157743	2253/2247/2250/26281/8074/2246/2254/8823/8817/2261
R-HSA-190239	FGFR3 ligand binding and activation	12	0.519779	1.45555	0.0656489	0.207625	0.157743	2253/2247/2250/26281/8074/2246/2254/8823/8817/2261
R-HSA-190372	FGFR3c ligand binding and activation	12	0.519779	1.45555	0.0656489	0.207625	0.157743	2253/2247/2250/26281/8074/2246/2254/8823/8817/2261
R-HSA-2033514	FGFR3 mutant receptor activation	12	0.519779	1.45555	0.0656489	0.207625	0.157743	2253/2247/2250/26281/8074/2246/2254/8823/8817/2261
R-HSA-5654227	Phospholipase C-mediated cascade; FGFR3	12	0.519779	1.45555	0.0656489	0.207625	0.157743	2253/2247/2250/26281/8074/2246/2254/8823/8817/2261
R-HSA-3238698	WNT ligand biogenesis and trafficking	14	0.484483	1.43202	0.0704648	0.212264	0.161268	54361/7474/7473/80326/81029/7480/7481/7476/7477
R-HSA-196854	Metabolism of vitamins and cofactors	28	0.396926	1.42692	0.0707547	0.212264	0.161268	337/344/1109/1582/338/55328/683/2239/952/335/7274/7276
R-HSA-1839124	FGFR1 mutant receptor activation	17	0.458641	1.42366	0.0713178	0.213073	0.161882	2253/2247/2250/26281/8074/2246
R-HSA-190322	FGFR4 ligand binding and activation	13	0.493527	1.41445	0.0762195	0.217001	0.164867	2253/2247/26281/8074/2246/9965/2254/8823/8817
R-HSA-5654228	Phospholipase C-mediated cascade; FGFR4	13	0.493527	1.41445	0.0762195	0.217001	0.164867	2253/2247/26281/8074/2246/9965/2254/8823/8817
R-HSA-6806667	Metabolism of fat-soluble vitamins	15	0.472605	1.41831	0.0768072	0.217821	0.165489	337/344/1109/338/2239/335/7274/7276
R-HSA-2219530	Constitutive Signaling by Aberrant PI3K in Cancer	56	0.317209	1.3436	0.0776545	0.219366	0.166664	5156/2253/2255/2247/2250/941/26281/8074/2246/2099/1950/50852/2248/9965/942/27006/940/3815/2254/8823/2323/5293/8817/2261/3932/2100/29851/930/3082
R-HSA-190375	FGFR2c ligand binding and activation	13	0.491141	1.40761	0.0792683	0.221341	0.168164	2253/2247/2250/26281/8074/2246
R-HSA-109704	PI3K Cascade	33	0.360161	1.36523	0.0855784	0.227097	0.172537	2253/2255/2247/2250/26281/8074/2246/2248/9965/27006/54106/2254/8823/2323/8817/2261/117145/2249/2322/5291
R-HSA-5654710	PI-3K cascade:FGFR3	16	0.458132	1.39387	0.0889571	0.23148	0.175867	2253/2247/2250/26281/8074/2246/2254/8823/8817/2261
R-HSA-5654700	FRS-mediated FGFR2 signaling	23	0.399743	1.35264	0.0974843	0.24631	0.187135	2253/2255/2247/2250/26281/8074/2246/2248/27006/2254/8823/8817
R-HSA-5654720	PI-3K cascade:FGFR4	17	0.433035	1.34417	0.0976744	0.24631	0.187135	2253/2247/26281/8074/2246/9965/2254/8823/8817
R-HSA-1483206	Glycerophospholipid biosynthesis	12	0.486561	1.36253	0.0977099	0.24631	0.187135	255189/50487/123745/51365/5319/8605/8399/5322
R-HSA-5654688	SHC-mediated cascade:FGFR1	20	0.422684	1.36733	0.0996835	0.247782	0.188252	2253/2255/2247/2250/26281/8074/2246/2248/27006/2254
