# Supplementary material
Source: HighWire-hosted journal article supplement (https://gut.bmj.com/content/gutjnl-2024-334589)
Supplement: inline-supplementary-material-11 [file inline-supplementary-material-11.xlsx]

## Sheet: Sheet1
Supplementary table 8 Differential gene expression table PDC vs IC
	logFC	logCPM	PValue	FDR
SFRP2	-1.54016	9.82072	2.09745e-15	3.80059e-12
THY1	-0.713656	9.28402	2.93425e-12	2.65843e-09
THBS4	-1.52857	10.0175	3.84808e-11	2.32424e-08
C7	-1.02969	9.13645	2.41129e-10	1.09231e-07
PLA2G10	0.776333	9.21111	1.87484e-09	6.79442e-07
SFRP4	-0.947118	9.41746	5.91547e-09	1.78647e-06
IL1R1	-0.628137	8.89813	8.17029e-09	2.11494e-06
CXCL14	0.704108	8.70189	1.09523e-08	2.2536e-06
NPM1	0.924931	8.48348	1.11934e-08	2.2536e-06
C3	-1.0663	10.3698	1.27248e-07	2.1229e-05
COL1A2	-0.944428	11.3109	1.28874e-07	2.1229e-05
AKT2	0.449989	8.93397	1.72139e-07	2.59929e-05
MXI1	0.571065	8.30097	3.14329e-07	4.29169e-05
HHIP	0.513194	8.66011	3.31587e-07	4.29169e-05
HPGD	0.738318	8.80218	4.53908e-07	5.4832e-05
DEPTOR	0.647529	9.26596	7.96896e-07	9.02484e-05
HLA_DQA1	-0.469855	9.12676	1.31196e-06	0.000139839
PLCB1	0.522819	8.26911	1.7526e-06	0.000176429
XPA	0.489283	8.69458	2.03322e-06	0.000193905
CD9	-0.739748	9.98774	2.15432e-06	0.000195181
LTF	1.05945	9.43448	2.65965e-06	0.000229489
FGF16	0.560993	8.21188	3.45374e-06	0.000284463
IRF7	-1.04576	8.6855	3.6763e-06	0.000289628
COL27A1	0.49734	8.98867	4.47034e-06	0.000333893
CCL15	-1.65275	9.92332	4.60669e-06	0.000333893
MAP3K5	0.408971	9.13399	4.88729e-06	0.000340607
TAPBPL	0.415282	8.78817	5.58793e-06	0.000375012
CMTM6	0.467525	8.69224	7.22953e-06	0.000467854
USP9Y	0.545173	8.08401	8.03517e-06	0.000502059
IGF2R	0.367948	9.04377	9.14378e-06	0.000552284
STAT5B	0.423441	8.61627	9.53346e-06	0.000557246
PDGFD	0.422397	8.69317	1.00053e-05	0.00056655
IDH2	0.555275	9.35551	1.07512e-05	0.00059034
LILRB3	0.596623	7.91646	1.15564e-05	0.000615891
PDGFA	0.537753	8.90995	1.20309e-05	0.000622857
WNT4	0.466339	8.33137	1.4658e-05	0.000721952
COL6A3	-0.88276	10.4238	1.47418e-05	0.000721952
CD48	0.479398	8.63094	1.66521e-05	0.000794044
PSEN2	0.46252	8.31433	1.92234e-05	0.000893149
ANXA1	-0.518565	9.80133	1.98853e-05	0.000900803
SLAMF7	0.385613	8.93558	2.17771e-05	0.00096244
ADH1A	0.969229	11.0321	2.7286e-05	0.00117719
CCR6	0.440885	8.39502	3.01533e-05	0.00127064
COL17A1	0.410718	8.52529	3.48768e-05	0.00142437
CEACAM3	-0.711189	8.12801	3.53861e-05	0.00142437
HSD11B1	0.483994	8.21323	3.61596e-05	0.00142437
CMTM4	0.34838	9.02886	3.96521e-05	0.00152596
COL5A2	-0.36272	8.9436	4.08115e-05	0.00152596
ADH6	0.437229	8.32314	4.1265e-05	0.00152596
LOXL2	0.437201	8.37758	4.64066e-05	0.00168178
ZBTB16	0.475654	8.47356	5.32267e-05	0.00189111
CD53	0.354219	8.82622	5.62637e-05	0.00196057
LCN2	1.62158	10.6283	5.97379e-05	0.00204236
TOX	0.434224	8.47385	6.44086e-05	0.00213339
IL1A	0.425804	8.34769	6.606e-05	0.00213339
REPS1	0.369482	8.72906	6.77007e-05	0.00213339
HDAC3	0.372031	8.69557	6.7882e-05	0.00213339
MTOR	-0.342187	9.00412	6.82873e-05	0.00213339
BMP4	0.522357	8.39141	7.59081e-05	0.00233128
THBS1	-0.680874	10.2555	9.40855e-05	0.00284138
TP53	0.325691	8.99145	0.000100044	0.0029718
ULBP2	0.506038	8.5212	0.000102815	0.00300486
CD3D	0.346655	9.01213	0.000131435	0.00378033
TNFRSF10D	0.396547	8.40045	0.000135692	0.00384178
HDC	0.352533	8.6676	0.000145344	0.00405174
CD209	0.43623	8.39684	0.000164455	0.00451503
TGFBR2	0.430249	9.28209	0.000168028	0.00454427
G6PD	-0.344829	8.85319	0.000172808	0.00460083
TNFRSF17	0.385255	8.73409	0.000176194	0.00460083
WNT6	-0.680143	8.42769	0.000177736	0.00460083
LILRA5	0.429654	8.15378	0.00018772	0.00479083
RASGRP2	0.455589	7.99294	0.000204851	0.00515542
SIRPA	-0.311626	9.14415	0.000215451	0.00523287
LILRB4	0.429376	8.1582	0.000217178	0.00523287
RAD50	0.344434	8.69728	0.000218754	0.00523287
ARID1B	0.316424	8.9574	0.000220975	0.00523287
PURA	0.389387	8.36754	0.00022363	0.00523287
CYP4A11	0.470037	8.04211	0.000225256	0.00523287
ALDOA	0.65968	10.4237	0.000248128	0.00569123
AURKA	0.414884	8.20421	0.000263492	0.0059681
IL15	0.394718	8.28968	0.000279308	0.00624821
GADD45B	-0.437219	8.93875	0.000287381	0.00635041
NDUFS8	0.376169	9.20966	0.000314293	0.00686143
FAM124B	0.380492	8.37547	0.000323183	0.00697153
CLEC4C	0.391396	8.26339	0.000328969	0.00699619
PLAU	0.351939	8.59604	0.000332049	0.00699619
ID2	-0.384172	9.49585	0.000336497	0.00700842
PMEL	0.367316	8.42508	0.000350133	0.00720955
COL3A1	-0.649371	12.1029	0.000375388	0.00764274
KEAP1	0.401657	8.21284	0.000389631	0.00778064
MBNL1	-0.431876	9.36364	0.00039075	0.00778064
HMGA1	-0.729763	10.1394	0.000438457	0.0086357
ADORA2A	0.467739	8.02676	0.000451128	0.00878815
ITPK1	0.359641	8.86917	0.000460717	0.00878815
GZMK	0.387669	8.25735	0.000460747	0.00878815
ADAM12	0.391346	8.20671	0.000467544	0.00882489
NUPR1	-1.51723	10.7066	0.00049301	0.00920963
CALML3	-0.839672	8.65248	0.000514515	0.00930121
TNFRSF10A	-0.335923	8.69503	0.000514554	0.00930121
CCL27	-0.441317	8.34614	0.000516556	0.00930121
SGK2	0.314738	8.92833	0.000518445	0.00930121
ICOS	0.367865	8.35664	0.000555866	0.0098748
IL20RA	0.310286	8.78487	0.000572983	0.0100801
GPR160	0.305004	8.83596	0.000586262	0.0102145
PDGFRB	-0.3	9.17469	0.000594484	0.0102591
HOXA11	-0.374134	8.72087	0.000628318	0.0105703
IL18RAP	0.335697	8.54586	0.000628769	0.0105703
DKK1	-0.601573	9.318	0.000630021	0.0105703
TAF3	0.337221	8.53652	0.000672827	0.011185
CCL28	0.322698	8.65918	0.000699915	0.0115295
NOTCH3	-0.274587	9.15322	0.000742957	0.0121283
CD14	-0.35243	8.95308	0.000764121	0.0123624
IFNA7	0.521913	7.46691	0.000792411	0.0127066
ETV1	0.342863	8.47585	0.00080377	0.0127757
BLNK	0.347116	8.81034	0.000822806	0.0129646
DNMT1	-0.305594	8.79679	0.000893374	0.0139551
FLNA	-0.50432	10.3361	0.00105309	0.0162941
NR3C1	0.294282	8.77944	0.00106375	0.0162941
HDAC11	0.304066	8.72348	0.00107009	0.0162941
FBP1	0.326355	9.06611	0.00109151	0.0164818
LRP1	-0.334142	9.61079	0.00112932	0.0169118
LAIR1	-0.332777	8.51894	0.00115295	0.0171241
MNX1	-0.439036	9.47451	0.00119871	0.0174354
PRKACG	-0.393936	8.261	0.00120013	0.0174354
BAGE	0.338346	9.29888	0.00120278	0.0174354
NDUFB8	0.287313	9.21053	0.00124106	0.0178476
SDHA	0.360443	9.82678	0.00128419	0.0179232
CD27	0.31943	8.53019	0.00128518	0.0179232
TYK2	-0.355724	9.37385	0.00129265	0.0179232
LDHB	0.510675	9.08053	0.00129352	0.0179232
CPA3	0.46633	8.89206	0.00130006	0.0179232
RAD52	0.31573	8.56121	0.00130566	0.0179232
RPS6KA6	0.365041	8.20666	0.00144061	0.0196197
JAG1	-0.328811	9.55142	0.0014509	0.0196197
SFRP1	-0.356816	8.89065	0.00148744	0.0199648
WNT3A	-0.515851	8.39513	0.00151301	0.0201587
PDK1	0.275878	8.85983	0.00157939	0.0208895
IRF3	0.259641	9.09008	0.00161592	0.021051
GBP4	0.295205	8.69886	0.00162484	0.021051
GADD45G	0.300915	8.65514	0.00162646	0.021051
TNFRSF12A	-0.597685	9.55399	0.00178618	0.0229543
CALML6	0.349062	8.22846	0.00188928	0.0241083
CD1E	0.312942	8.45747	0.00192712	0.0244192
GBP1	0.304927	8.55223	0.00200145	0.025185
IFNAR1	0.299231	8.5704	0.00205156	0.0256374
CEBPE	-0.394289	8.38856	0.00212147	0.0262534
TOLLIP	0.287215	8.67827	0.00212983	0.0262534
MMP1	-1.01757	9.81115	0.0021822	0.0266397
FUBP1	0.293031	9.29777	0.00219057	0.0266397
HLA_A	0.519011	12.1813	0.00233247	0.0280387
CSF2RB	0.299694	8.5769	0.00233655	0.0280387
SETBP1	-0.343528	8.38361	0.0023658	0.0281645
C8B	0.360523	8.07245	0.00237813	0.0281645
MAF	0.274435	8.78441	0.00240029	0.0282424
IFNA8	0.360101	8.18225	0.00243675	0.0284863
POU2AF1	0.40253	9.05884	0.00246946	0.0286837
FZD1	-0.321981	9.05171	0.00254704	0.0293964
CD79B	-0.312063	8.70952	0.00261173	0.0298803
CDC20	-0.273664	8.92762	0.00262195	0.0298803
MYCT1	0.299845	8.54178	0.00268312	0.0303309
E2F3	0.314281	8.38734	0.0027067	0.0303309
IFITM2	-0.526199	10.0221	0.0027354	0.0303309
PRM1	0.342881	8.18622	0.00274379	0.0303309
CCL3_L1	-0.715662	9.21291	0.00274518	0.0303309
PTPN5	0.283618	8.66882	0.00281669	0.0307064
DGLUCY	0.259118	9.24562	0.00283533	0.0307064
IGFBP3	0.464929	9.18317	0.0028497	0.0307064
ITGA2	-0.282663	9.15118	0.0028572	0.0307064
IL21	0.298861	8.48474	0.00286389	0.0307064
CXCL5	0.98356	8.31214	0.0028928	0.0307336
MTF2	0.301586	8.4476	0.00290036	0.0307336
FUT5	-0.346392	8.22929	0.00292769	0.0308429
ISG20	0.361151	8.02701	0.00308198	0.0322806
UBE2C	-0.373311	9.4465	0.00315115	0.0328154
BMPR1B	0.319088	8.3245	0.00319262	0.032967
TPM4	-0.419213	11.0061	0.0032021	0.032967
MSH6	0.302005	8.44632	0.00329093	0.0334342
PTGDR2	0.283169	8.63332	0.00330283	0.0334342
SOS1	0.283112	8.63467	0.00330283	0.0334342
VSIR	-0.328889	8.93767	0.00341698	0.0343976
CCL20	-0.512002	8.89364	0.00363726	0.0362118
PDGFRA	0.244174	8.96911	0.00364959	0.0362118
RORC	0.276316	8.87693	0.00365715	0.0362118
IGLL1	0.334098	8.9994	0.00377174	0.036952
RBP4	-0.401326	8.99685	0.00377269	0.036952
GLUD1	0.270116	8.66484	0.00398532	0.0388247
IL1RAPL2	0.304797	8.34242	0.00412164	0.0399381
CD99	-0.298131	9.82922	0.00417797	0.0402685
FGCR2A	-0.278298	9.36253	0.00427405	0.0406954
NLRC5	0.256716	8.8601	0.00428318	0.0406954
FOXA2	-0.623135	9.45812	0.00428964	0.0406954
PKP3	-0.351012	9.39816	0.00435477	0.0410982
FN1	-0.583506	10.153	0.00443421	0.0416311
SKP2	0.242599	8.95669	0.0044592	0.0416498
ASPG	-0.329995	8.32831	0.00456537	0.0424228
MAPK10	0.241599	8.95191	0.00463925	0.0428894
IL1RL1	0.267861	8.64169	0.0047134	0.0431616
PRAME	-0.312701	8.35461	0.00471633	0.0431616
INHBB	-0.356435	8.33728	0.00483917	0.0439794
ATRX	0.23416	8.96789	0.00485424	0.0439794
FOXJ1	0.280556	8.56443	0.00489711	0.0441471
RET	-0.520395	8.98901	0.00503742	0.0450316
FGF7	-0.289702	8.6021	0.00504493	0.0450316
IL17F	0.293208	8.41344	0.00514086	0.0456629
RIPK3	0.259245	8.76241	0.00517088	0.0457055
ATP2A2	0.319691	9.28365	0.00523272	0.0460276
FOXC1	-0.265704	8.76292	0.005362	0.0469369
PSPH	0.271932	8.57965	0.005432	0.047321
BAP1	0.254274	8.76539	0.00563976	0.0488959
CEACAM8	-0.365919	8.44058	0.0057596	0.0492804
PUM1	0.235893	9.01991	0.0057608	0.0492804
ITGAV	-0.329633	9.55637	0.00578889	0.0492804
CST2	0.247836	8.82119	0.0057929	0.0492804
DAB2	-0.271656	8.65683	0.00585236	0.0493743
LAMP3	0.316679	8.12076	0.00586573	0.0493743
DLL3	0.345512	8.16055	0.00588567	0.0493743
HK2	0.273117	8.53756	0.00592905	0.049509
LTBR	-0.317753	10.0207	0.00599051	0.0497927
SFN	-0.424187	9.93701	0.00611992	0.0506361
C6	0.294223	8.40224	0.00619909	0.051058
IRF1	0.301969	8.30991	0.00634413	0.0520162
APOC2	-0.253063	8.79627	0.00639794	0.052221
TNF	-0.470308	9.5016	0.00645342	0.0524376
ME2	0.229674	9.1738	0.0065787	0.053217
CCL1	-0.353943	8.69784	0.00662415	0.0533465
SKP1	0.269653	8.54978	0.00670696	0.0535148
ZEB1	0.265952	8.54928	0.00670696	0.0535148
SAMSN1	0.270733	8.51887	0.00673365	0.0535148
IBSP	-0.285645	8.76208	0.00676768	0.0535504
MEF2C	-0.290824	8.64113	0.00682444	0.0537647
NFE2L2	0.339702	9.9026	0.00688819	0.054032
PPP3CC	0.310145	8.17717	0.00691961	0.0540445
EDN1	-0.313666	8.92417	0.00697032	0.054207
HLA_E	0.346842	10.4046	0.00730742	0.0565857
MAPK9	0.253337	9.05883	0.00739692	0.0569001
AQP9	0.255589	8.60744	0.00741083	0.0569001
S100A9	0.339525	8.13619	0.00757379	0.0579059
ACTR3B	-0.414567	9.2317	0.0076774	0.0581243
CAMP	0.315403	8.09209	0.00769766	0.0581243
CCL18	-0.667844	9.31802	0.00771859	0.0581243
DTX4	0.245871	8.76042	0.00773066	0.0581243
E2F1	-0.257229	8.6853	0.0079489	0.0595182
MYB	0.264425	8.60855	0.00810004	0.0604003
KMT2D	-0.283701	9.28826	0.00829917	0.0616316
TECR	0.27645	9.41256	0.00854249	0.0631795
NTRK2	0.26776	8.44805	0.00872029	0.063818
TPSAB1	0.723224	10.8818	0.00872121	0.063818
LRP2	0.306061	8.11325	0.00873448	0.063818
CTSG	-0.284182	8.42944	0.00878666	0.0639415
TNFSF18	0.260445	8.49204	0.00893437	0.0647563
CCR5	0.292776	8.21204	0.00900497	0.065008
IL27	0.293971	8.37737	0.00934422	0.0671894
CD19	0.254345	8.55955	0.00943851	0.0675991
BIRC3	-0.493385	9.02852	0.00958812	0.0684003
ARG2	0.239328	8.70492	0.00974654	0.0692061
CNOT2	0.25553	8.53967	0.00977746	0.0692061
PARP9	0.212808	9.19759	0.00998353	0.0703897
FGF23	0.284286	8.26887	0.0101166	0.0708518
GNGT1	0.323581	8.13186	0.0101675	0.0708518
GABPA	0.2343	8.73551	0.0102408	0.0708518
CCL19	0.306431	8.29572	0.010241	0.0708518
CCL5	0.247328	8.73323	0.0102878	0.0708518
KRT7	-0.746853	10.2986	0.0103034	0.0708518
LCK	-0.330536	8.71709	0.0103887	0.0708518
HDAC2	0.211143	9.18661	0.0104046	0.0708518
IGF1R	0.227535	8.82838	0.0104274	0.0708518
RIN1	-0.480839	9.10844	0.0104401	0.0708518
NOD2	0.258789	8.51274	0.0105583	0.071205
EFNA5	0.250577	8.57087	0.0105801	0.071205
OAS3	0.242458	8.64082	0.01061	0.071205
GOT1	0.207653	9.06003	0.0108031	0.07208
SLC16A2	-0.295519	9.08177	0.0108551	0.07208
PDCD1	-0.396181	9.1792	0.0108597	0.07208
LAMA5	-0.244349	9.11538	0.0109685	0.0725361
IRAK1	-0.268018	9.35126	0.0110168	0.0725906
FANCG	0.259864	8.52011	0.0110711	0.0726841
PKM	-0.368581	10.5099	0.0113791	0.0744365
GADD45A	-0.314201	9.12146	0.0114292	0.0744954
PITX2	0.257059	8.45282	0.0114956	0.0746596
PSMB5	-0.274911	9.48092	0.0115519	0.0747573
APP	0.406154	10.1861	0.0115977	0.0747868
ADM	-0.392505	8.93219	0.0116992	0.0751737
TXNIP	0.431379	11.3269	0.0117964	0.0755302
ELOB	0.314586	9.54589	0.0119816	0.0762164
MSR1	0.254272	8.44674	0.0119877	0.0762164
CD79A	0.353341	9.02983	0.0123181	0.0779734
PBX1	0.232563	8.67119	0.0123745	0.0779734
FZD3	0.253577	8.4714	0.0123931	0.0779734
SLC25A1	0.26225	9.2599	0.0124452	0.0780301
ATOX1	0.201125	9.14724	0.0125462	0.0783624
AKAP1	0.287585	9.39232	0.0125847	0.0783624
CDH5	0.260104	8.42273	0.0126828	0.0785213
MECOM	0.301204	9.86322	0.0126969	0.0785213
BATF	-0.258745	8.55822	0.0130735	0.0805752
ASNS	-0.260087	9.44538	0.0132824	0.0815852
GNAS	0.340184	10.7439	0.0133417	0.0816727
TICAM2	0.254384	8.45996	0.0134669	0.082162
ANGPT1	0.270526	8.25283	0.0137181	0.0834135
XCR1	-0.610082	9.3443	0.0138818	0.0839131
HLA_B	0.441811	12.2353	0.0138929	0.0839131
MAPK3	0.208707	9.25063	0.0139605	0.083951
KRT18	-0.551595	12.3863	0.0139918	0.083951
CCL11	0.26522	8.67657	0.0141951	0.0848894
ISG15	-0.257146	8.94904	0.0145197	0.0860897
NFKB2	-0.251912	9.35244	0.014537	0.0860897
VCAM1	0.235112	8.56503	0.0145383	0.0860897
BMP6	0.240347	8.57548	0.0148827	0.0878419
SMO	0.262125	8.34553	0.0150279	0.0884111
TNFRSF13C	0.257888	8.45467	0.0153268	0.0898777
ZBTB20	-0.283782	8.24067	0.0154102	0.090075
STAT2	0.217308	9.32802	0.0155761	0.0905449
C4B	0.295878	9.20084	0.0155905	0.0905449
IL1RN	0.209097	8.97316	0.0156775	0.0907591
TGFB3	-0.222337	8.87579	0.01583	0.0910131
CDKN2A	-0.240402	8.71722	0.0158429	0.0910131
NGFR	-0.208455	9.02671	0.015872	0.0910131
FGF5	0.258256	8.34971	0.0161171	0.0920824
PRKCD	-0.241759	9.06216	0.0161602	0.0920824
HLA_DQB1	0.228818	8.74136	0.0164057	0.0931884
BLVRA	0.234503	8.53123	0.016686	0.0942124
POLD1	-0.235688	9.01627	0.0167037	0.0942124
IL9	0.274325	8.18141	0.0167419	0.0942124
EPHA2	-0.380216	9.61062	0.0170447	0.095619
CACNG4	0.255966	8.39036	0.0170976	0.0956202
TPTE	0.226933	8.60939	0.0172806	0.0962592
MAP2K2	-0.221601	9.96696	0.0173182	0.0962592
TAL1	-0.250752	8.52547	0.0175555	0.0972801
CDK1	-0.244374	8.61392	0.0177314	0.097955
GOT2	0.189376	9.14127	0.0178566	0.0983469
LCP1	-0.239221	8.59222	0.0180037	0.0988568
TREM1	0.233646	8.51563	0.018453	0.100785
DUSP4	0.213707	8.81044	0.0184662	0.100785
S100A7	0.326466	8.57224	0.0186269	0.101357
MYBL2	-0.208809	9.0108	0.0190342	0.103264
PASD1	0.214516	8.72289	0.0192177	0.103948
COX4I1	0.328833	10.8259	0.0197559	0.106541
CXCL1	-0.5252	9.44559	0.0200041	0.107559
TCF7L1	0.234983	8.53115	0.0200888	0.1076
SNAI1	-0.228867	8.83193	0.0201305	0.1076
SBNO2	-0.23585	9.60843	0.0202101	0.107655
FUT8	0.189618	9.1086	0.0202595	0.107655
IL16	0.226039	8.52795	0.0204928	0.108174
PIK3R3	0.250164	8.34411	0.0205194	0.108174
CASP1	0.203028	8.8406	0.0205498	0.108174
PFKFB3	-0.214201	9.06214	0.020596	0.108174
IL1R2	0.225173	8.87039	0.0206866	0.1082
RNF43	0.224884	8.64893	0.0207204	0.1082
COL1A1	-0.483737	11.0086	0.0208244	0.108431
LY6E	-0.375296	9.83453	0.0209477	0.10876
CDC25A	-0.231293	8.6613	0.0212466	0.109997
ICAM3	0.204979	8.8883	0.0215204	0.111097
ASCL1	0.262114	8.17263	0.0216192	0.11129
PLA2G2A	-0.207217	8.91393	0.0217921	0.111862
EFNA3	-0.307101	8.50208	0.0220153	0.112688
ACTB	-0.385469	13.8538	0.0221459	0.113037
PDGFB	0.22988	8.51266	0.0226343	0.115206
EBI3	-0.271907	8.74597	0.0228353	0.115607
TNFRSF1B	-0.227369	9.35283	0.0228408	0.115607
CXCL2	-0.514034	9.86078	0.0232022	0.116829
NOTCH1	0.212631	8.80117	0.023211	0.116829
SRSF2	0.24474	9.7014	0.0236727	0.118823
CCL25	-0.365287	8.79981	0.0238426	0.119345
F2RL1	0.193073	8.9933	0.0244532	0.122064
KRT14	-0.485262	9.59122	0.0245699	0.12231
CCL16	0.256191	8.24161	0.0248111	0.122904
CEBPA	-0.306234	9.1713	0.024825	0.122904
RASA4	-0.230243	9.23808	0.025118	0.123741
CEP55	-0.222699	8.66795	0.0251306	0.123741
PDPN	0.201613	8.85529	0.0253662	0.124562
GPX4	-0.225395	9.85868	0.0254553	0.124662
MCL1	-0.315425	10.2578	0.0255538	0.124807
CSF1R	-0.189533	9.24548	0.0256647	0.125012
ARNT2	0.198257	8.79407	0.0265939	0.129128
PTGER4	0.188968	8.92128	0.0267234	0.129128
JAK2	0.186637	8.92171	0.0267234	0.129128
TNN	-0.239342	8.89232	0.0269583	0.12987
NECTIN1	-0.211771	9.38097	0.0270204	0.12987
FGF17	-0.3141	8.67679	0.0273148	0.130937
FCN1	0.228942	8.43797	0.0274883	0.131421
STING1	-0.194262	9.14372	0.0275986	0.131602
HLA_DOB	0.204557	8.7529	0.0277484	0.131969
EXO1	0.22169	8.53481	0.0281953	0.133743
ID1	0.43612	10.1173	0.0283058	0.133917
NRP1	-0.19887	9.23597	0.0285168	0.134564
WNT10B	0.205597	8.77144	0.0286651	0.134912
TTK	0.234561	8.348	0.0295174	0.138454
TYMP	-0.245693	9.23553	0.0295704	0.138454
UQCR10	0.203516	8.74166	0.0298593	0.139156
CDK2	0.224629	8.49741	0.029878	0.139156
ITGB1	-0.267374	10.6336	0.0300678	0.139156
POLR2J	-0.22742	8.48372	0.0300988	0.139156
CEACAM6	-0.815233	10.553	0.0301044	0.139156
PSMC4	-0.181977	9.12304	0.0303847	0.140094
CXXC4	0.241224	8.29181	0.0305162	0.140344
COL6A6	0.254336	8.12622	0.0306876	0.140774
ITGB6	-0.31378	9.73818	0.031059	0.142119
MCM7	-0.278229	9.63857	0.0312557	0.142658
IRF5	0.249896	8.46035	0.0319069	0.145264
GRIN1	-0.389441	9.07468	0.0319967	0.145308
ORC6	0.20938	8.59514	0.032151	0.145644
RUNX1	-0.176642	9.19929	0.0323713	0.146119
RPL7A	0.432861	12.1624	0.0324645	0.146119
TPI1	-0.259208	9.15637	0.0325284	0.146119
HPRT1	0.200231	8.64355	0.0325783	0.146119
TNC	-0.190268	9.01188	0.0328788	0.146851
MS4A4A	0.21867	8.42257	0.0329037	0.146851
PPP3CB	-0.220248	8.54353	0.0331285	0.1473
APOM	0.243552	8.17015	0.0331723	0.1473
ATG12	-0.241742	8.33343	0.0332481	0.1473
PSMD7	-0.185739	8.98744	0.0334718	0.147324
IKBKG	-0.25467	9.08283	0.0334735	0.147324
GZMH	0.205358	8.5481	0.0334976	0.147324
IFI27	0.394376	10.2918	0.0338551	0.148536
TIGIT	0.208235	8.57261	0.03407	0.149118
APC	0.188068	8.76839	0.0341751	0.149217
IRF9	0.191783	8.88535	0.0347319	0.151284
PRKACA	-0.176142	9.13626	0.0352493	0.15314
NKX3_1	-0.210249	8.66092	0.0353723	0.15314
DEFB134	-0.192858	8.78668	0.0354115	0.15314
POU5F1	0.215412	8.46763	0.035601	0.153593
MSH2	-0.193019	8.85754	0.0358938	0.154488
GPI	-0.301185	10.218	0.0363301	0.155995
PVR	-0.190421	8.91888	0.0364983	0.156347
IL12B	0.229891	8.24027	0.0366206	0.156501
ANKRD28	0.185317	8.81327	0.0367605	0.156729
TNFSF4	0.219138	8.37079	0.0370148	0.157443
FZD6	-0.201081	8.74054	0.0371749	0.157754
EFNA1	-0.274314	9.29709	0.0375821	0.158958
MBL2	0.191703	8.64694	0.037634	0.158958
TNFRSF14	0.183062	9.30678	0.0377753	0.159183
CCNE1	0.18704	8.74068	0.0381735	0.160145
SMARCA4	0.193404	9.31877	0.0381802	0.160145
UQCRQ	0.189173	9.53866	0.0385663	0.161299
B2M	0.380513	13.4869	0.0386335	0.161299
CCL17	0.230006	8.24597	0.0390185	0.162532
CTSH	-0.256934	10.1892	0.0396877	0.16494
CCND1	-0.200937	9.84453	0.0400948	0.166154
TUBB	-0.245361	9.75736	0.0402829	0.166154
MIA	0.309559	9.19076	0.0403364	0.166154
APOE	-0.219493	8.51261	0.0403465	0.166154
LTK	0.185616	8.82093	0.0405329	0.166543
LDHA	0.226637	8.27204	0.0407511	0.167061
ABL1	-0.261312	9.29925	0.041121	0.168197
ARMH3	-0.190056	8.88337	0.041585	0.169514
IRGM	0.210426	8.41155	0.0416302	0.169514
FCGR3A	-0.198492	8.65351	0.0418784	0.169827
FH	0.162055	9.13998	0.0419041	0.169827
ATP5ME	0.215139	10.4797	0.0419882	0.169827
RRM2	-0.226868	9.32591	0.0427151	0.172027
ESR1	0.203545	8.53477	0.0427219	0.172027
CXCR3	-0.275519	8.55842	0.0431729	0.173458
CTAG1B	-0.356748	8.86698	0.0434791	0.174301
C8A	-0.219599	8.61726	0.0441539	0.176616
CD28	0.18189	8.74047	0.0444932	0.177206
EYA1	0.217072	8.53558	0.0445834	0.177206
HAMP	0.212483	8.51327	0.0445949	0.177206
NFIL3	0.187087	8.67947	0.0453008	0.179052
CBLC	-0.227142	9.4337	0.045336	0.179052
EGFR	-0.165033	9.12941	0.0453558	0.179052
S100A8	-0.197645	8.59934	0.0455911	0.179483
TBL1XR1	-0.16765	9.10533	0.0456733	0.179483
NDUFS7	-0.221854	9.68832	0.0457621	0.179483
FOXA1	0.177257	9.20295	0.0467197	0.182248
CREB3L4	0.230901	8.17779	0.0467553	0.182248
CD2	0.178119	8.78951	0.0467688	0.182248
TNFAIP6	0.182983	8.73334	0.0469104	0.182407
SGK1	0.290227	9.52211	0.0473641	0.183777
RAC1	-0.279571	10.0074	0.0477069	0.184376
IRF4	0.220927	8.37305	0.0477372	0.184376
CEBPB	-0.169844	9.16768	0.0478239	0.184376
CACNA2D3	0.209735	8.38299	0.0486141	0.186996
CD81	-0.2508	10.4783	0.0488025	0.186996
SIRPB2	-0.194345	8.95149	0.048813	0.186996
P2RY13	0.176166	8.73695	0.0492481	0.187987
DDIT4	0.320004	9.62785	0.0492792	0.187987
AMBP	0.206249	8.39657	0.0494913	0.188091
NUF2	0.191594	8.60444	0.049514	0.188091
FYN	0.178172	8.80297	0.0496691	0.188285
HSPB1	-0.368371	11.3273	0.0501493	0.189709
TAP2	-0.171923	9.16387	0.0506883	0.191238
CCL23	0.218527	8.21312	0.0508416	0.191238
WNT7A	0.203387	8.46373	0.0509228	0.191238
ELK1	-0.169327	8.88443	0.0509756	0.191238
CREBBP	0.163931	9.02563	0.0511746	0.191588
MKI67	-0.175228	8.97143	0.0522817	0.19434
SOX2	-0.238471	9.12961	0.052302	0.19434
FUT7	-0.249341	8.57646	0.0523751	0.19434
VCAN	-0.294822	9.80649	0.0524202	0.19434
PRKDC	-0.200817	9.54662	0.0526549	0.19434
FGF20	0.20003	8.4726	0.0527436	0.19434
TLR3	0.196374	8.55338	0.0528075	0.19434
LGALS3	-0.312463	10.8268	0.0528549	0.19434
ITGAL	0.20183	8.4583	0.052875	0.19434
CXCR5	-0.211123	8.65562	0.0531889	0.195098
TNFRSF4	-0.215096	8.89433	0.05342	0.19555
MCM4	-0.182647	9.08812	0.0535432	0.195606
RPS6KB1	0.223855	8.20296	0.0540057	0.196898
PBRM1	-0.238435	8.06588	0.0543087	0.197605
CD180	0.177834	8.67404	0.0546715	0.198365
U2AF1	-0.18698	9.86619	0.0547365	0.198365
TLR5	0.175511	8.75407	0.0548817	0.198494
KLRC1	0.219425	8.18031	0.0550993	0.198627
POLD4	-0.172653	8.84217	0.0551375	0.198627
TNKS	0.19294	8.57235	0.0553968	0.199165
PDZK1IP1	-0.306595	9.73805	0.0557831	0.200156
FZD5	-0.331273	8.87865	0.0562604	0.201233
PRDM1	0.167774	8.98534	0.0564143	0.201233
CD6	-0.204272	8.4324	0.0564164	0.201233
HOXA10	-0.201218	8.42629	0.05681	0.202239
TAB1	0.156333	8.98269	0.0573266	0.203678
PROM1	-0.27855	8.67386	0.0581116	0.206063
AFDN	-0.221645	8.70365	0.0582264	0.206067
P4HA1	-0.165363	9.06282	0.058453	0.206465
MAVS	0.1615	9.04608	0.0587932	0.207263
IGF1	-0.207628	8.49077	0.0591507	0.208119
DLL4	-0.226972	9.01012	0.0592971	0.208229
CD3G	0.167661	8.74042	0.0598029	0.209096
XRCC4	-0.181497	8.77292	0.0599603	0.209096
MDC1	-0.198424	8.51092	0.0600304	0.209096
IL1RAP	-0.188114	8.63522	0.0601598	0.209096
KLF4	-0.432516	9.84985	0.0601818	0.209096
AXIN2	-0.274942	9.14751	0.0603176	0.209096
PKMYT1	-0.205082	8.43156	0.0603622	0.209096
CD38	0.15612	9.00309	0.0604672	0.209096
CYBB	0.209944	8.24751	0.0606933	0.209479
ALK	0.194698	8.37365	0.0609418	0.209668
HDAC5	0.167654	8.80365	0.0610208	0.209668
CXCR4	-0.218625	9.23386	0.0610952	0.209668
DNAJC14	0.170482	8.79255	0.0613441	0.210124
BRAF	-0.197481	8.40589	0.0616588	0.210803
SPRED1	0.162148	8.89494	0.0620258	0.211659
EPM2AIP1	0.183892	8.57806	0.0623509	0.212368
TCL1B	0.175647	8.71204	0.0625034	0.212488
MAP4K2	-0.203071	9.33449	0.0626493	0.212585
NDC1	-0.169041	8.96383	0.0637186	0.215737
MAPK11	0.165984	8.80793	0.0638163	0.215737
PBX3	-0.192925	8.54362	0.0639867	0.215911
NFATC4	0.187373	8.52057	0.0645133	0.217283
FZD9	-0.201057	8.55433	0.0648656	0.218064
IRS1	-0.228473	8.82599	0.0655004	0.21979
ID4	0.180278	8.55505	0.0660614	0.221263
IL34	0.172954	8.62947	0.0666134	0.2227
HLA_DRB5	0.434749	9.18102	0.0672435	0.224393
SYT17	0.172551	8.74338	0.0678123	0.225875
NKX2_1	0.194312	8.33713	0.0684638	0.227627
IFITM1	-0.209335	9.3235	0.0690399	0.229121
CCNE2	0.161457	8.79393	0.0693486	0.229419
TLR6	0.176445	8.55956	0.0693829	0.229419
APOA2	-0.174538	8.75779	0.0695211	0.229457
FGF8	-0.215175	9.0781	0.0696831	0.229574
CACNA1D	-0.18512	8.51181	0.0702706	0.23109
CREB5	-0.195467	8.8022	0.0706171	0.231808
SPINK5	0.180534	8.544	0.0709458	0.232466
IL11RA	0.168448	8.73585	0.071327	0.233293
TBC1D10B	-0.146887	9.07719	0.0719759	0.234992
THBD	-0.178419	8.84424	0.0723384	0.235529
WNT2	-0.200823	8.29137	0.0724004	0.235529
LY86	-0.209416	9.25474	0.0728728	0.236641
AKR1C4	0.182156	8.68823	0.0731297	0.23705
PLOD2	0.146767	9.01361	0.0748711	0.242262
TFEB	-0.15997	8.90152	0.0751027	0.242473
FBXW7	0.162637	8.81411	0.0752042	0.242473
BID	0.195869	8.23662	0.0763577	0.245336
CENPF	-0.182027	8.58092	0.0763627	0.245336
PTCRA	-0.246804	9.09038	0.0770167	0.246292
SMAP1	0.149103	8.90222	0.0770447	0.246292
STK11	0.13638	9.14163	0.0770682	0.246292
HDAC10	0.153833	8.92074	0.0772667	0.246491
ZBTB32	-0.195538	8.74323	0.0793398	0.252603
TPM1	-0.30054	10.8661	0.0794612	0.252603
GSK3B	-0.162318	8.87349	0.0799845	0.253448
PYCARD	-0.187602	9.05373	0.0800067	0.253448
WRN	0.169468	8.58474	0.0810683	0.255653
RIPK1	0.171194	8.621	0.081149	0.255653
CCL7	0.214249	7.9886	0.0811637	0.255653
ASPA	0.152503	8.7795	0.0812671	0.255653
FZD2	0.164402	8.67974	0.0816126	0.256295
TWIST2	0.180904	8.39338	0.0822324	0.257794
DUSP6	-0.163629	9.14422	0.0830366	0.259866
FCER2	-0.190065	8.39482	0.083323	0.259926
VEGFA	-0.270496	10.5818	0.0833428	0.259926
CFB	0.230173	9.05887	0.0836497	0.260435
CIC	-0.142588	9.03763	0.0842578	0.261878
CACNA2D2	0.187524	8.34219	0.0848104	0.262822
CDC25B	-0.171665	9.45576	0.0848516	0.262822
NUMBL	-0.256499	9.04364	0.0850257	0.262912
ATG10	0.171434	8.53836	0.0852808	0.263211
TSLP	-0.207989	9.08405	0.0855961	0.263211
BCOR	0.142092	8.99784	0.0856174	0.263211
RAD21	-0.175398	9.60249	0.0857033	0.263211
FZD8	-0.160988	8.92332	0.0859897	0.263644
TERT	0.165036	8.6095	0.0868873	0.265946
CTNNB1	-0.218104	10.24	0.0871113	0.266182
NOD1	-0.151848	8.92378	0.0873288	0.266397
MAGEB2	0.160086	8.65479	0.0878003	0.267385
MRC1	-0.172193	8.70807	0.0881718	0.268066
LYZ	0.429689	14.9094	0.0893509	0.271196
FPR2	-0.204228	8.18306	0.0900063	0.272728
TFDP1	0.143847	9.25493	0.0908792	0.274913
PGF	0.177923	8.44552	0.0911323	0.274977
C9	0.177479	8.38707	0.0912946	0.274977
DDX58	0.166749	8.56243	0.0914652	0.274977
HLA_DRB3	-0.398911	10.3845	0.0915074	0.274977
NCF4	0.183406	8.34239	0.0925767	0.277675
CD44	-0.3573	10.1367	0.0927117	0.277675
RFC4	0.169854	8.46695	0.0934363	0.279384
DTX1	-0.174986	8.48324	0.0948192	0.283052
SOX17	-0.175324	8.6683	0.0951628	0.28361
PARP12	0.137504	9.07799	0.095978	0.28557
IL18R1	0.159272	8.6154	0.0966492	0.287016
MAPT	-0.188374	8.29569	0.0967807	0.287016
PML	-0.181303	9.33181	0.0970474	0.28721
GRB7	-0.16586	8.64793	0.0971632	0.28721
C1S	-0.217862	10.158	0.0976219	0.288078
PPARG	0.186653	8.27015	0.097775	0.288078
SERINC5	-0.15588	9.89109	0.0980158	0.288158
OTC	0.145973	8.85359	0.0981814	0.288158
CDC14B	0.142236	8.98739	0.0983628	0.288158
IL2	0.161727	8.57501	0.0984382	0.288158
CYFIP2	0.152729	8.73662	0.0993687	0.290413
MRM2	-0.152713	8.84184	0.100019	0.290917
UQCR11	0.132444	9.19932	0.100189	0.290917
TMUB2	0.143471	8.94687	0.100229	0.290917
RORA	0.165565	8.53383	0.10023	0.290917
LRP5	-0.158053	9.33256	0.100344	0.290917
IL13RA1	-0.163574	9.44525	0.100611	0.291226
IL10RA	0.159302	8.61958	0.100987	0.291847
ALCAM	0.144191	9.17554	0.101647	0.293011
CXCL13	0.172425	8.36638	0.101713	0.293011
RRAD	-0.211495	8.80697	0.101904	0.293094
BBC3	0.159134	8.68525	0.103727	0.297865
UBB	0.187787	11.2612	0.105172	0.301363
MAPK1	0.130642	9.07189	0.105433	0.301363
OPN3	0.13947	8.87278	0.105444	0.301363
LFNG	-0.233832	9.34916	0.10629	0.303304
CCR3	0.154764	8.53604	0.106646	0.30384
TAP1	0.168783	9.23373	0.107094	0.304637
PDCD1LG2	0.15842	8.54634	0.107788	0.305664
EIF2B4	-0.136405	9.188	0.107792	0.305664
NFATC1	0.145774	8.73247	0.10865	0.307616
TLR4	-0.172806	8.49151	0.108831	0.307647
TICAM1	-0.136985	9.03856	0.1092	0.30821
FZD4	0.149186	8.68601	0.109925	0.309538
AICDA	-0.185473	8.21801	0.110012	0.309538
GZMM	-0.181401	8.32421	0.110457	0.310306
ELANE	-0.196036	8.87642	0.11069	0.310312
COL4A3	0.183972	8.24769	0.111004	0.310312
TTC30A	-0.162879	8.6954	0.111035	0.310312
BTK	-0.16542	8.49851	0.111241	0.310312
TTR	0.217975	8.59236	0.111315	0.310312
MUC4	-0.174199	8.66605	0.111497	0.310341
RICTOR	0.137441	8.89102	0.113001	0.313947
IL4R	-0.147392	9.45058	0.113139	0.313947
PTCD2	0.150099	8.59871	0.113412	0.314224
NDUFA12	-0.169897	9.58584	0.113807	0.314838
CD8A	-0.233126	8.88394	0.114133	0.315258
CD69	0.144213	8.79543	0.114589	0.316036
HLA_F	0.206011	11.1376	0.114959	0.316575
FCGR1A	0.141009	8.87576	0.117336	0.322629
FGF21	0.162712	8.47735	0.118321	0.324359
IL22RA2	-0.169892	8.46558	0.118323	0.324359
CTCFL	0.162241	8.46363	0.119082	0.32516
HDAC4	0.133199	8.8725	0.119117	0.32516
DTX3L	0.128366	9.0455	0.119154	0.32516
TMEM163	-0.188074	9.22589	0.119376	0.325278
IL22	0.151906	8.60003	0.120289	0.327274
TRDC	0.147355	8.62437	0.120573	0.327447
CT45A1	-0.236707	8.8487	0.120851	0.327447
CD5	0.135485	8.88902	0.120895	0.327447
CXADR	0.134706	8.86742	0.122751	0.331534
ICOSLG	0.136959	8.84703	0.12277	0.331534
SELE	-0.184886	8.26082	0.123148	0.332059
BNIP3L	0.151282	8.60863	0.123411	0.332135
MPPED1	-0.146579	8.89398	0.123542	0.332135
ITGA3	-0.191539	9.50709	0.12385	0.332468
SPINK1	0.560059	12.3439	0.12418	0.332861
RASGRF2	-0.171341	8.25732	0.124531	0.333137
SOCS3	-0.297711	9.14074	0.124651	0.333137
CXCR1	-0.180942	8.42107	0.125763	0.335614
WIPF1	-0.146541	9.38412	0.126177	0.336225
CD164	0.181893	10.3137	0.126694	0.337107
NSD2	0.127752	8.92825	0.127117	0.337403
CD40LG	0.164547	8.33742	0.127401	0.337403
HIF1A	-0.137733	9.16682	0.127568	0.337403
C2	0.154515	8.62553	0.12771	0.337403
JUN	-0.321167	10.5927	0.127736	0.337403
LEF1	0.170543	8.27657	0.128214	0.337707
STK11IP	-0.210932	9.0514	0.128224	0.337707
GNLY	-0.148241	8.81559	0.128905	0.339008
JUNB	-0.335137	10.6193	0.130544	0.342819
CPSF7	0.133609	8.8661	0.13125	0.34407
AMH	-0.311897	8.97578	0.1314	0.34407
FCGRT	-0.223784	10.8488	0.132318	0.345974
FGFR1	-0.132871	9.05516	0.133668	0.349001
MAPK12	0.153227	8.53115	0.134278	0.350089
COL2A1	0.15074	8.46602	0.134535	0.350254
CD83	0.146765	8.62713	0.135163	0.351385
CXCL16	-0.169543	9.41363	0.135719	0.352325
CACNA1C	0.151247	8.50195	0.136198	0.353017
PTPRC	0.131802	8.8298	0.136375	0.353017
LTB	-0.13483	8.98034	0.136647	0.353217
KIR3DL3	-0.15952	8.3434	0.137617	0.354809
TNFRSF18	0.147315	8.68061	0.137773	0.354809
EFNA2	-0.177276	8.82103	0.137851	0.354809
ICAM1	-0.164642	8.73213	0.13932	0.357606
LAMB3	-0.276387	9.75161	0.139332	0.357606
SEMG1	0.156488	8.41689	0.139684	0.357734
E2F4	-0.153103	9.52716	0.139777	0.357734
FGF18	0.149421	8.47055	0.140454	0.358427
KIT	0.153415	8.40209	0.14065	0.358427
ITGB7	0.12908	8.89275	0.14096	0.358427
TLR9	-0.142849	8.70893	0.141131	0.358427
TBXAS1	0.123302	8.95832	0.141166	0.358427
SIX1	-0.150723	8.71903	0.141235	0.358427
H3C2	-0.270521	9.82624	0.141791	0.359269
RELB	-0.228796	8.72714	0.141963	0.359269
FZD7	-0.151807	8.59592	0.142348	0.359742
COMP	0.23621	8.31337	0.143264	0.361553
CD274	0.164746	8.18955	0.143657	0.362041
KRT10	0.125617	8.92705	0.144624	0.36397
FGF19	0.155631	8.43816	0.144861	0.364062
TNFSF13B	-0.145104	8.72197	0.146051	0.366543
RAD51	-0.140455	8.79206	0.147139	0.368458
NDUFA7	-0.151178	9.60813	0.14722	0.368458
PTCH1	-0.126696	9.06085	0.147858	0.369543
MASP1	-0.144028	8.70863	0.148548	0.37063
PLA2G1B	0.137438	8.67793	0.148702	0.37063
SRR	-0.144785	9.12564	0.150813	0.375376
PDGFC	0.119939	8.89989	0.151269	0.375716
PTPN11	0.132259	9.34721	0.151389	0.375716
CXCL8	0.154337	8.37469	0.151572	0.375716
RAC3	0.166291	9.00005	0.152951	0.378285
NDUFB7	-0.131354	11.1381	0.153026	0.378285
ACTA2	-0.229154	10.3216	0.153686	0.3794
GNAQ	-0.153529	8.42674	0.154019	0.379705
PRLR	-0.147952	8.6158	0.154256	0.379773
GATA3	0.138193	8.63552	0.154616	0.380141
PRC1	0.119761	8.93326	0.154976	0.380336
CD4	0.116091	8.97804	0.155115	0.380336
CCR4	0.138345	8.59906	0.155841	0.381599
UBA7	0.120167	9.15618	0.156068	0.38164
CACNA1E	0.142838	8.46226	0.156504	0.382191
GRIN2B	0.13684	8.56364	0.157027	0.382951
NOX1	-0.135887	8.79393	0.15771	0.383828
NFKBIE	-0.137972	8.84513	0.15781	0.383828
RELA	-0.129207	9.34554	0.158648	0.385348
CD3E	0.126466	8.72128	0.159008	0.385685
ATF2	-0.139059	9.35583	0.159305	0.385685
GDF6	0.142419	8.60859	0.159537	0.385685
SMPD3	-0.212739	9.14092	0.159638	0.385685
TNFRSF10B	-0.133764	9.41436	0.16053	0.386984
CD33	0.116468	8.97236	0.160603	0.386984
NOS2	-0.157684	8.7626	0.161252	0.388033
MMP9	-0.127999	8.80506	0.162752	0.391123
FLNB	0.179721	9.68491	0.163509	0.39231
ATM	0.109108	9.05549	0.163679	0.39231
IL21R	-0.133975	9.0206	0.163972	0.392493
POLE2	-0.151647	8.4922	0.164222	0.392572
PLA2G4E	0.1364	8.52949	0.164647	0.393069
KDR	0.148711	8.38489	0.165196	0.393863
CASP9	-0.136407	8.65758	0.165909	0.395043
GMIP	-0.136619	8.71564	0.166279	0.395403
ZEB2	-0.125558	9.08201	0.166615	0.395684
TMPRSS2	0.226558	9.94991	0.168433	0.399478
IL3RA	0.128309	8.6866	0.169086	0.400131
PRKAR1B	0.117961	9.10748	0.169314	0.400131
HDAC1	-0.138031	9.57428	0.169371	0.400131
CDKN2B	0.141899	8.4468	0.169804	0.400404
IFNGR2	-0.129995	8.82852	0.169928	0.400404
ITGB2	0.139726	8.95107	0.171805	0.404222
CD74	-0.359967	13.0813	0.171995	0.404222
COL24A1	0.135637	8.54542	0.172624	0.404266
EIF5AL1	0.134356	8.54615	0.172624	0.404266
CFP	0.145405	8.49402	0.172683	0.404266
RFC3	-0.123137	8.96839	0.173167	0.404875
IL7	-0.154354	8.3354	0.173595	0.405354
WNT7B	-0.156471	8.49148	0.174048	0.405735
CES3	0.119555	8.87634	0.174391	0.405735
CTLA4	0.148933	8.33142	0.174721	0.405735
TCL1A	-0.12317	8.90105	0.174871	0.405735
EZH2	0.134736	8.60997	0.174878	0.405735
BCL6	0.127206	8.73245	0.177375	0.410638
POLB	-0.12066	9.03804	0.177444	0.410638
IKBKE	0.130324	8.65397	0.179845	0.415663
PRKCE	-0.129347	8.84792	0.180151	0.41584
C1QB	-0.145138	9.16288	0.181581	0.418606
SLC11A1	-0.177887	9.03201	0.182354	0.419855
ITGA6	0.146082	9.56678	0.182845	0.420451
LILRB2	0.158894	8.44879	0.183834	0.421003
IL22RA1	-0.129732	8.67228	0.183915	0.421003
PRR5	0.116718	8.78935	0.183979	0.421003
E2F5	0.132996	8.45717	0.184082	0.421003
MAGEA3	-0.179023	9.23337	0.184247	0.421003
SMAD2	0.1265	8.69294	0.184609	0.421203
SLC1A5	-0.162484	9.56991	0.18485	0.421203
MAGEA12	0.113285	9.12031	0.185032	0.421203
CACNG6	0.142716	8.38803	0.185558	0.421311
CDKN1B	0.104454	9.11644	0.185656	0.421311
CD247	-0.122887	8.87359	0.185777	0.421311
H3C10	-0.270659	10.4182	0.186031	0.421361
PLAUR	-0.161185	8.98577	0.187624	0.424438
H3_5	0.165958	9.54611	0.189108	0.426833
NAT8L	-0.175135	8.85355	0.189381	0.426833
TNFSF12	-0.187179	9.14414	0.18939	0.426833
IL32	-0.200469	9.74601	0.190405	0.428396
HK1	-0.142559	8.91378	0.190556	0.428396
PSMB2	-0.111979	9.01505	0.191414	0.429792
TIE1	-0.145825	8.72975	0.192023	0.430625
PLA2G4A	-0.135739	8.6467	0.19427	0.435127
TAPBP	0.119306	9.25266	0.195181	0.436102
APOC3	-0.209022	8.95213	0.195187	0.436102
SERPING1	-0.185937	9.92877	0.195656	0.436498
FSTL3	-0.194278	8.57086	0.195846	0.436498
MLPH	0.176068	10.6959	0.196543	0.437515
PSMB9	0.115902	8.87229	0.197073	0.438154
CD160	0.123537	8.60042	0.198864	0.441189
ICAM5	0.133188	8.4394	0.199307	0.441189
MYC	-0.161438	9.7371	0.19952	0.441189
CTSL	-0.120229	9.22852	0.199603	0.441189
GAS1	0.141412	8.32962	0.199655	0.441189
MFNG	-0.125907	9.2787	0.204555	0.451466
CD1A	0.117833	8.65028	0.205166	0.452264
BDNF	-0.130003	8.73223	0.205611	0.452695
ERCC6	-0.118902	8.82912	0.206191	0.45342
TFRC	-0.159447	9.83209	0.206552	0.453664
PAK3	-0.118807	8.91599	0.20746	0.454987
PARP4	0.121726	9.55633	0.207657	0.454987
ARG1	0.107222	8.84456	0.208996	0.457369
ITGB8	-0.126426	9.18649	0.20951	0.45794
CCND2	-0.120213	8.8315	0.209968	0.458388
KLRG1	0.123254	8.52998	0.210769	0.459576
CD59	-0.16221	9.25124	0.211021	0.459576
MMP11	0.128591	8.64544	0.211273	0.459576
GATA2	-0.17907	9.19275	0.211639	0.459819
ETS1	-0.10929	9.09229	0.211962	0.45997
GATA1	-0.111219	8.91364	0.212884	0.461419
IL11	0.135918	8.25864	0.213236	0.46163
WIF1	0.121727	8.60871	0.21373	0.462147
CXCL12	0.128106	8.47666	0.214883	0.464085
IL13RA2	-0.154516	8.10517	0.215246	0.464317
CMKLR1	-0.118799	8.74388	0.216165	0.465295
SPO11	0.131339	8.36794	0.216213	0.465295
SIN3A	0.109119	8.91115	0.217057	0.466557
OLFML2B	-0.122258	8.85107	0.217834	0.466751
LAIR2	-0.113924	8.85177	0.217834	0.466751
MUC1	0.263856	11.6618	0.21792	0.466751
CD36	-0.112329	9.03266	0.218969	0.468443
TSPAN7	-0.107818	8.96887	0.222497	0.474955
EPO	-0.13362	8.58833	0.222537	0.474955
FLT3LG	0.108856	8.7114	0.222859	0.475082
PRKAR2A	0.1027	9.04523	0.223177	0.47509
CDC6	0.116227	8.60122	0.223387	0.47509
ENTPD1	0.131117	8.42827	0.224005	0.475402
RUNX1T1	0.120449	8.5774	0.224058	0.475402
NF1	0.0974756	9.0029	0.224483	0.475746
ITGAE	-0.121329	8.58239	0.225058	0.475976
ETV4	-0.1141	8.82578	0.225338	0.475976
ITGAM	0.114085	8.58672	0.225379	0.475976
HLA_DOA	0.133688	8.28768	0.225668	0.47603
RGMB	0.116283	9.09373	0.226234	0.47667
ITGA9	0.120392	8.53913	0.226707	0.477112
PIK3R1	-0.116354	8.92213	0.228008	0.479294
CCR9	-0.165237	8.62301	0.228833	0.479755
FANCF	-0.119629	8.66232	0.229014	0.479755
NKD1	0.125	8.43679	0.229022	0.479755
BIRC7	-0.139536	8.65099	0.229386	0.479962
CASP8	-0.104098	9.15892	0.230733	0.482225
FAAP24	-0.111808	8.80809	0.231157	0.482553
APH1B	0.105737	8.75361	0.235028	0.490069
CREB3L1	-0.147	10.0335	0.237343	0.493802
PCK2	-0.0998847	9.01716	0.237526	0.493802
FGF10	-0.106144	8.86411	0.237645	0.493802
PTTG2	-0.122876	8.67453	0.237927	0.493802
DNMT3A	-0.116744	8.57414	0.238181	0.493802
A2M	-0.209691	10.1877	0.239377	0.495161
SP1	0.0970555	9.10589	0.239383	0.495161
CR2	0.12716	8.39975	0.240436	0.496773
FGF11	0.117635	8.59656	0.241625	0.4973
TWIST1	0.113754	8.59655	0.241625	0.4973
THEM4	0.0934243	8.95504	0.241766	0.4973
GNG12	-0.130505	9.25883	0.241789	0.4973
CTSS	0.141459	9.96842	0.242466	0.498128
TYMS	-0.115275	9.044	0.243694	0.500084
OAT	0.112944	9.63401	0.244029	0.500205
PGPEP1	-0.114863	9.19098	0.244515	0.500633
BST1	-0.115568	8.7126	0.244953	0.500965
CYLD	0.10409	8.81303	0.245986	0.50241
COLEC12	-0.123093	8.63944	0.246214	0.50241
HLA_DRB	-0.262875	11.2475	0.24652	0.502468
CACNA2D4	0.123871	8.39242	0.247963	0.504841
CYP8B1	0.118097	8.46924	0.249503	0.507406
ASXL1	-0.117009	8.60709	0.250307	0.50847
OAS1	-0.0934861	9.06892	0.25065	0.508597
LILRA1	0.117099	8.51746	0.251506	0.509764
MAP3K12	0.09851	8.99792	0.253541	0.513314
DSP	-0.144446	10.1687	0.254758	0.514536
GRIA3	0.123359	8.34734	0.254808	0.514536
PLA2G4C	0.100953	8.76727	0.255121	0.514536
SERPINB5	-0.142524	9.05929	0.25528	0.514536
SHC4	0.109787	8.61798	0.256182	0.514818
ICAM2	-0.149665	8.91931	0.256268	0.514818
MAP2K6	0.0951616	8.96153	0.256318	0.514818
BAX	-0.151659	9.68283	0.256557	0.514818
FOXP3	-0.121203	8.40024	0.257628	0.516396
CCNB3	0.107396	8.53538	0.258006	0.516582
BMP2	0.0972732	8.92456	0.259108	0.517335
P4HA2	0.0934255	9.13865	0.259202	0.517335
TANK	-0.0986098	9.23508	0.259239	0.517335
SMC1B	0.107488	8.57982	0.259647	0.51758
ATR	-0.106075	8.92715	0.260257	0.518226
TNFRSF8	-0.109488	8.84001	0.260779	0.518696
CREB1	0.117139	8.44591	0.263357	0.522676
MS4A2	0.115729	8.44394	0.263357	0.522676
PMCH	0.136367	8.56391	0.263845	0.523072
TLR2	0.100801	8.75106	0.264517	0.523831
NDUFB11	0.0964171	9.33348	0.265105	0.523995
CUL1	-0.122831	9.30889	0.265323	0.523995
SERINC1	-0.118685	9.53201	0.265468	0.523995
CSF3	0.11964	8.40456	0.266756	0.525542
BRD2	-0.113192	9.99659	0.266832	0.525542
PSAT1	-0.107553	8.87357	0.269342	0.52991
ECSIT	0.0954841	8.89044	0.26972	0.530078
MET	-0.102557	9.2425	0.270871	0.531765
INHBA	-0.124544	8.39652	0.27118	0.531795
COL11A2	0.0958606	8.72241	0.27312	0.535021
SOCS2	-0.112594	8.58728	0.274101	0.536362
NSD1	0.112352	8.5689	0.27487	0.536751
CD84	0.11635	8.39769	0.274909	0.536751
RPS6	0.229039	12.7495	0.275189	0.536751
LAMP1	-0.177733	10.2209	0.277753	0.541171
CCND3	-0.112204	9.42848	0.278255	0.541565
NTF3	-0.118854	8.37004	0.278731	0.54191
PPP2R1A	-0.109407	9.7737	0.279403	0.541948
LILRA3	-0.120067	8.41038	0.279537	0.541948
HACD2	-0.108162	8.93064	0.279648	0.541948
PPP2R3A	0.101272	8.57688	0.280104	0.542252
HLA_DRA	-0.221746	11.1859	0.280716	0.542858
BCL2L1	-0.113824	9.57507	0.28314	0.546732
HLA_C	0.16553	11.3472	0.283323	0.546732
TLR1	0.116589	8.32168	0.283829	0.547126
IFNGR1	-0.107895	9.26973	0.285152	0.549092
TBX21	0.0951465	8.72386	0.285496	0.549171
TNFAIP3	-0.129371	9.24556	0.286176	0.549895
LBP	0.115404	8.30361	0.286529	0.54999
GLUL	0.110127	8.42453	0.287849	0.551939
TNFRSF1A	-0.0957236	9.581	0.288749	0.553079
MDM4	0.0971129	9.37068	0.289095	0.553157
HMGA2	-0.0927085	8.98595	0.289577	0.553344
CRABP2	-0.126536	8.23935	0.289872	0.553344
CASP10	0.0882018	9.07275	0.2902	0.553344
SPRY2	-0.0898125	9.23963	0.290414	0.553344
RBX1	-0.0970873	9.33323	0.291181	0.554223
RASAL1	-0.0950078	8.99327	0.291592	0.554422
PIK3CD	-0.106485	8.64056	0.291914	0.554452
FOXL2	-0.119483	8.16857	0.292879	0.555703
MTF1	-0.0961733	8.78118	0.293404	0.556034
SYCP1	0.0987636	8.68812	0.293671	0.556034
BCL2	-0.0918148	8.98754	0.293974	0.556034
NOTCH2	-0.0940927	9.03555	0.294796	0.557007
PSMB10	0.10616	9.45979	0.296742	0.559831
H3_3A	-0.173729	11.2683	0.296908	0.559831
CDC25C	0.0965099	8.65124	0.298096	0.561487
ASL	0.108577	9.68051	0.298675	0.561993
SPIB	-0.132474	8.81193	0.300472	0.564789
GPC4	0.090142	8.81226	0.303954	0.57074
FGF13	-0.100827	8.78064	0.305685	0.573396
FGF4	0.102763	8.61348	0.306751	0.574802
CCL4	-0.0944806	8.61165	0.307864	0.576291
KDM5C	-0.102357	8.66001	0.309909	0.579083
FGF2	0.0939382	8.6438	0.310391	0.579083
IL23A	-0.0994537	8.78299	0.310633	0.579083
APLNR	0.109888	8.30003	0.310894	0.579083
VEGFB	0.0830313	9.01918	0.310953	0.579083
WNT16	0.0983348	8.58627	0.312704	0.58103
CCL26	-0.115072	8.35061	0.312748	0.58103
IL10	-0.101204	8.61704	0.312961	0.58103
IL33	0.148877	8.9291	0.313691	0.581405
MAP3K13	0.0916884	8.82454	0.313805	0.581405
IFNA1	0.105403	8.36546	0.314252	0.58164
ITGA8	0.0945375	8.684	0.315062	0.582542
SERPINH1	-0.0997423	9.29746	0.315706	0.583139
PECAM1	0.0864159	8.93131	0.317365	0.585606
FGF1	0.0952565	8.60534	0.319479	0.588907
CD163	0.106485	8.92857	0.319917	0.589115
IFI16	0.104836	8.77079	0.321363	0.590592
FANCL	0.075902	9.04556	0.321607	0.590592
LEFTY2	-0.11153	8.31639	0.321875	0.590592
ETV7	0.11224	8.30602	0.322026	0.590592
IL2RG	-0.120169	9.30772	0.322348	0.590592
KLRF1	0.107966	8.31853	0.323644	0.592367
MX1	0.0972003	8.78232	0.324201	0.592692
MMRN2	0.0950449	8.56718	0.324476	0.592692
JAG2	0.121131	8.59574	0.325193	0.593403
CD24	-0.283389	12.2906	0.326436	0.594653
CDK6	-0.170295	9.29991	0.326534	0.594653
RELN	-0.115643	8.28341	0.327438	0.595701
LIFR	0.126339	7.99569	0.328087	0.596283
UBC	0.172072	11.8646	0.328647	0.596418
KIR_FAMILY	0.10756	8.3279	0.330067	0.596418
CLECL1	0.095087	8.57432	0.330171	0.596418
CHEK1	-0.10688	8.51788	0.330554	0.596418
CD22	0.0863867	8.85955	0.330672	0.596418
WEE1	-0.0898258	8.94263	0.3307	0.596418
TRAF3	0.0919255	8.7049	0.331079	0.596418
SOCS1	-0.131748	8.6915	0.332622	0.596418
GLI1	-0.120291	8.70327	0.332922	0.596418
NGF	-0.110037	8.96756	0.332924	0.596418
ANP32B	0.101887	9.8242	0.33293	0.596418
BCL2A1	0.0894597	8.63984	0.332969	0.596418
PYCR3	-0.100368	8.54825	0.333143	0.596418
LILRB1	0.0868692	8.72319	0.333249	0.596418
MRE11	0.0849459	8.72382	0.333249	0.596418
HRAS	-0.0877413	9.03368	0.333874	0.596418
CDKN1A	-0.0918151	8.90766	0.334554	0.596418
TTPA	0.0920959	8.57252	0.33466	0.596418
RB1	-0.100447	8.63008	0.334744	0.596418
ADH4	-0.0982924	8.63056	0.334744	0.596418
NASP	-0.0923965	9.57028	0.33509	0.596447
CHUK	0.0843722	8.82872	0.336016	0.596778
IL12RB1	0.131254	8.10202	0.336119	0.596778
SIRT4	0.0867917	8.79066	0.336264	0.596778
SIGIRR	-0.0828826	9.20078	0.337112	0.597698
CCNA1	0.104718	8.3086	0.338313	0.59924
OSM	-0.0920161	8.87845	0.339069	0.599993
LRRN3	0.0943083	8.48793	0.339441	0.600065
GIMAP6	-0.0959542	8.63259	0.340306	0.600732
RBL2	0.0797574	9.24026	0.340496	0.600732
ACVR1C	0.0856482	8.70852	0.340812	0.600732
IRAK3	0.0910825	8.63308	0.341851	0.601763
IL12A	0.101382	8.42256	0.342062	0.601763
IL26	0.098109	8.38302	0.342581	0.602092
CD86	0.0893166	8.67254	0.346374	0.60815
PIN1	-0.101074	8.59943	0.346699	0.60815
KAT2B	0.0948496	8.47053	0.347597	0.609135
NBN	0.0818308	8.90356	0.348435	0.609566
PRL	-0.0973222	8.64583	0.348515	0.609566
SELP	-0.0934696	8.72278	0.350384	0.612243
SERINC2	-0.0979298	9.5741	0.352694	0.615685
TACSTD2	-0.0949552	9.09267	0.353587	0.616651
WNT5B	0.0893809	8.6147	0.354379	0.61679
COX6B1	-0.134955	10.8372	0.354579	0.61679
TRBC1	0.10757	9.25814	0.354688	0.61679
NEGATIVE_PROBE	0.0961911	8.40153	0.355373	0.617388
RPTOR	-0.0885434	8.91363	0.355726	0.61741
FEZ1	0.0887769	8.67867	0.356494	0.617598
MGMT	-0.0834095	8.97509	0.356652	0.617598
CDK4	-0.0808351	9.05703	0.356857	0.617598
PYCR2	0.091407	8.60236	0.357882	0.618781
PMS2	0.0843642	8.69839	0.358634	0.619491
FOS	-0.274456	11.0931	0.359071	0.619654
HES5	-0.0875713	8.7111	0.360727	0.621919
CASP7	0.0808239	9.08609	0.362458	0.62381
CXCL3	-0.131632	9.33442	0.362512	0.62381
AKT3	0.0886733	8.59613	0.36736	0.631131
ARID2	0.0701424	9.22217	0.367463	0.631131
S100B	-0.096137	8.44152	0.368096	0.63162
ENDOG	-0.0815559	8.93924	0.369122	0.632458
CD55	-0.167142	9.55962	0.369356	0.632458
GZMA	0.09528	8.43071	0.369632	0.632458
WT1	0.111507	8.19762	0.370387	0.633153
PCK1	-0.0872171	8.83147	0.371264	0.633472
PVRIG	0.0975548	9.2337	0.371273	0.633472
RAG1	0.0941976	8.50022	0.372411	0.634055
SMC3	-0.080501	9.23021	0.372629	0.634055
DOCK9	0.081443	8.73819	0.372899	0.634055
ARID1A	0.0865794	9.38545	0.373015	0.634055
DLL1	0.0859461	8.84391	0.374124	0.635345
LAMA3	0.116419	8.12464	0.375238	0.636074
PPP3CA	-0.0703613	9.04607	0.375256	0.636074
SAMD9	0.0802071	8.81475	0.375917	0.636599
FLT1	0.0772555	8.77738	0.37676	0.637432
CACNG1	0.092779	8.49669	0.377433	0.637975
FGFR4	0.075237	9.00431	0.380762	0.642566
ZIC2	-0.0927232	8.56756	0.381343	0.642566
SF3B1	-0.0902592	10.3476	0.381381	0.642566
FST	0.0857051	8.54196	0.382296	0.642566
RIPK2	0.091435	8.49648	0.382509	0.642566
SLC39A6	0.070929	9.12183	0.382763	0.642566
ARNT	0.0712156	9.02773	0.382943	0.642566
KIF2C	-0.102086	8.34545	0.382986	0.642566
C1R	0.114032	9.71484	0.383811	0.643354
PTTG1	-0.0868035	8.74729	0.385073	0.644078
IER3	-0.209377	10.2712	0.385256	0.644078
IFI35	0.0747251	9.15034	0.385309	0.644078
MME	-0.0904856	8.57419	0.38653	0.645523
RPS27A	-0.11866	11.3206	0.387058	0.645606
TWF1	0.08203	9.21209	0.387292	0.645606
NRAS	0.0700675	9.08101	0.387788	0.645837
NRDE2	0.0838953	8.60609	0.389131	0.647122
CGAS	-0.0919288	8.64727	0.389746	0.647122
JAK1	-0.0827411	9.75404	0.389793	0.647122
XCL1	0.0852248	8.71915	0.390715	0.647122
PTPRR	-0.0819046	8.93425	0.390937	0.647122
MDM2	0.072659	9.22622	0.391024	0.647122
MAP3K8	0.0762431	8.87184	0.391059	0.647122
SOX11	0.0818811	8.53686	0.392437	0.648811
BCL6B	0.0950687	8.45072	0.394337	0.650394
PAX3	-0.0839953	8.8394	0.394374	0.650394
KLRB1	0.0907287	8.40211	0.39448	0.650394
TRAF7	-0.0847195	9.28556	0.39507	0.650394
HSPA1A	-0.127177	10.1443	0.39519	0.650394
PRKCA	-0.0739914	9.11451	0.39814	0.654655
CD46	0.0858056	9.89687	0.398987	0.654944
CD207	-0.08683	8.64438	0.399174	0.654944
SMAD4	-0.0721981	9.03618	0.39954	0.654944
OAS2	-0.0725043	8.97816	0.399761	0.654944
AKT1	0.0849722	9.77605	0.404318	0.661811
MEN1	-0.075982	8.89661	0.404754	0.661926
CACNB3	-0.0809795	8.80502	0.405227	0.662064
HSPA6	-0.0757476	8.99044	0.405933	0.662064
HLA_DPA1	-0.100132	9.64136	0.406111	0.662064
TBP	0.0692019	9.04116	0.40665	0.662064
PGM2	-0.0759622	8.94151	0.407045	0.662064
BRD4	0.0719637	9.22937	0.407189	0.662064
CASP12	-0.0879276	8.65291	0.407452	0.662064
TNFRSF25	-0.0743685	8.92777	0.408121	0.662064
ROBO4	-0.0857458	8.4182	0.408127	0.662064
WNT11	-0.0941385	8.4012	0.409034	0.662943
SPRY4	0.0758223	8.87755	0.411163	0.665798
H2AX	-0.0739681	8.89336	0.413596	0.669139
PIK3R2	0.0650569	9.05085	0.416821	0.673726
AIRE	0.0871599	8.45025	0.417175	0.673726
PLCG2	0.064424	8.97318	0.417687	0.673953
ENO1	-0.0775038	8.87212	0.418065	0.673962
ANGPT2	-0.0849633	8.70562	0.420656	0.677536
GRIN2A	0.0741813	8.67067	0.422595	0.680055
IFNAR2	0.0765794	8.76966	0.426461	0.685667
IL20RB	0.083891	8.4437	0.428302	0.686361
BCL10	-0.0816832	8.71722	0.429253	0.686361
YTHDF2	-0.0773263	9.40556	0.42928	0.686361
CCR2	0.0753878	8.57022	0.429478	0.686361
LIG4	0.0786808	8.51325	0.42959	0.686361
LEFTY1	0.135037	8.61556	0.429647	0.686361
NCAM1	0.0743479	8.74763	0.429794	0.686361
IL6	-0.0852818	8.48148	0.429923	0.686361
DUSP8	-0.0677141	9.08848	0.431848	0.688828
BMP5	-0.0979664	8.06644	0.432475	0.689222
FGF9	0.0709473	8.6856	0.434804	0.692005
LY9	0.0653347	8.92749	0.435302	0.692005
LAMC2	-0.173571	8.96623	0.435367	0.692005
PPARGC1A	-0.0880257	8.7589	0.436158	0.692654
MAPK8IP2	0.0802565	8.58884	0.436906	0.692964
KMT2C	-0.0679186	9.0709	0.437118	0.692964
LEP	-0.083509	8.51523	0.43853	0.693536
BCAT1	-0.0857642	8.62579	0.438556	0.693536
HLA_G	0.0844854	8.70767	0.438627	0.693536
CCL21	-0.0931729	8.58682	0.439994	0.695091
GLI3	0.0733972	8.65004	0.442636	0.698656
ALDOC	0.0845284	8.48224	0.444161	0.699768
FOLH1	0.0810629	8.42084	0.444262	0.699768
CD63	0.132668	11.2123	0.445136	0.699768
FAM30A	0.0764003	8.61695	0.445234	0.699768
TNFRSF13B	-0.0692169	8.85019	0.445272	0.699768
MR1	0.0708395	8.74827	0.446008	0.700318
TRAT1	-0.0821201	8.70041	0.446493	0.700472
BRCA2	0.0864519	8.26207	0.447069	0.700521
CD276	0.07658	9.11798	0.447297	0.700521
ERBB2	-0.0779231	9.73452	0.44815	0.70125
SIGLEC8	0.0697251	8.60296	0.449749	0.703145
MAP3K1	-0.0716173	9.22799	0.452323	0.706041
ABCB1	0.0703749	8.69514	0.452381	0.706041
ITGB3	0.0630415	8.79196	0.455108	0.709351
RUNX3	-0.0747484	8.71149	0.455285	0.709351
GAGE1	0.0895705	8.09568	0.456429	0.710523
OLR1	-0.0947396	8.40475	0.458953	0.71384
HLA_DMA	-0.106491	9.45552	0.460567	0.714933
SNCA	0.0721703	8.53063	0.460768	0.714933
KDM6A	0.0644084	8.86215	0.46084	0.714933
SPRY1	-0.0766248	8.48659	0.461316	0.715006
MAGEA1	-0.0986892	9.09243	0.461676	0.715006
DUSP2	0.06598	8.88037	0.462186	0.715184
IL7R	0.0737309	8.61538	0.463479	0.715762
SRP54	0.0594272	9.17907	0.463937	0.715762
MLF1	0.0681794	8.70059	0.46396	0.715762
C8G	-0.0732357	8.54683	0.464431	0.715762
LAMA1	0.0714941	8.5736	0.464608	0.715762
LRRC32	-0.0843502	8.47919	0.465431	0.715762
MAGEC2	0.0622165	8.85984	0.465953	0.715762
KYAT1	-0.0720989	8.77494	0.46611	0.715762
TREM2	0.0722885	8.65808	0.466114	0.715762
PNMA1	0.0658948	8.80463	0.466994	0.716505
HELLS	-0.0779184	8.67556	0.46827	0.717473
PCNA	-0.100352	9.39452	0.468416	0.717473
STC1	0.0728968	8.49178	0.469372	0.718184
PIK3CA	-0.0775533	8.65784	0.469673	0.718184
CRP	0.0663036	8.70682	0.470193	0.718372
PAK5	0.0792687	8.36979	0.470662	0.718483
MCM2	0.0631606	8.92748	0.47106	0.718486
GLS	-0.0779764	8.66791	0.472232	0.719435
BATF3	0.0736322	8.66589	0.472477	0.719435
RRAS2	0.0666379	8.7438	0.47326	0.720023
TLK2	0.0620538	8.82892	0.474318	0.721028
NR4A1	-0.187315	10.3734	0.475535	0.722271
MICB	0.0550081	8.86405	0.476946	0.723808
AURKB	-0.0724542	8.84368	0.478624	0.725746
COL4A5	0.066952	8.54259	0.480037	0.72728
BMP7	0.0946268	7.98247	0.481067	0.727467
MYD88	-0.0593509	9.12739	0.481306	0.727467
CCR7	0.0822743	8.39871	0.481365	0.727467
JAML	0.0666793	8.64009	0.482059	0.727909
FOXO4	-0.0667048	8.82225	0.484055	0.729927
SSX1	0.114173	11.5034	0.4844	0.729927
CCNA2	-0.0674735	9.20739	0.484611	0.729927
MS4A6A	0.0679976	8.52909	0.485006	0.729927
TLR10	0.0706325	8.3972	0.486324	0.730862
HHEX	0.0771865	8.33561	0.487149	0.730862
CCR1	0.0676949	8.48214	0.487239	0.730862
NF2	-0.0714085	8.61209	0.48739	0.730862
PPARGC1B	0.0683016	8.63726	0.487754	0.730862
GBP2	0.0612087	8.8675	0.488048	0.730862
TNFSF10	-0.079593	9.35609	0.489787	0.732734
VEGFC	0.0604264	8.66666	0.490107	0.732734
FANCA	0.0591171	8.9095	0.490996	0.733458
MAP3K7	0.0596317	9.25067	0.49267	0.735353
IFNA2	0.0775886	8.40696	0.493596	0.736129
SPN	0.0649141	8.72454	0.494518	0.736897
CDH2	-0.0745469	8.66821	0.49611	0.738662
SOS2	0.0650315	8.61058	0.497722	0.739778
ERCC2	0.0649552	8.77113	0.497917	0.739778
CTSW	0.0639059	8.78022	0.498569	0.739778
TIRAP	0.0732307	8.39065	0.498869	0.739778
RPLP0	0.0715888	8.31326	0.498901	0.739778
ZC3H12A	0.0683857	9.03847	0.501093	0.742101
UBE2T	-0.0671088	8.86803	0.501584	0.742101
RAD51C	0.0625723	8.82501	0.501697	0.742101
CLEC6A	0.0601843	8.75846	0.502816	0.743151
TNFRSF10C	-0.066435	8.76652	0.503314	0.743281
GUSB	0.0524925	9.00564	0.504105	0.743842
NDUFA1	-0.0819242	10.2918	0.505952	0.74596
NOS1	0.0558106	8.84051	0.508329	0.748855
APOA4	0.058059	8.68789	0.50947	0.749593
PMAIP1	0.0801947	8.19894	0.509657	0.749593
HMGB1	0.0645368	8.45928	0.510936	0.749657
CLEC7A	0.075762	8.29574	0.510965	0.749657
PF4	-0.0789668	8.51124	0.511293	0.749657
TNFSF8	-0.0646139	8.84175	0.511355	0.749657
VHL	-0.0553094	9.05315	0.512213	0.750308
DTX3	0.0663519	8.67477	0.514585	0.753172
KLRD1	0.0687851	8.34419	0.515171	0.753421
SREBF1	0.0822028	9.64678	0.516792	0.755184
FLNC	-0.0766209	8.81588	0.518851	0.757582
H3C8	-0.117758	9.60452	0.520678	0.759637
RASGRP1	0.0587373	8.70037	0.522409	0.760256
GNA11	-0.0615827	9.31995	0.522729	0.760256
SNAI2	-0.0687187	8.79896	0.523265	0.760256
SMAD5	0.0493267	9.00272	0.523628	0.760256
COX6A1	-0.0953122	11.2967	0.523818	0.760256
TNFSF14	-0.0676641	8.73187	0.524207	0.760256
TMEFF2	-0.0664301	8.63647	0.524269	0.760256
TNR	0.0650411	8.46364	0.524459	0.760256
BLM	-0.0686611	8.54459	0.526429	0.761968
GHR	0.0597446	8.58566	0.526857	0.761968
MAPKAPK2	-0.0646164	9.59126	0.526901	0.761968
NECTIN2	-0.0600446	9.29044	0.527483	0.7622
AREG	-0.0679948	9.18291	0.527944	0.762217
BNIP3	-0.0702926	8.63537	0.528706	0.762217
HEY1	0.0646888	8.35044	0.529398	0.762217
CD68	-0.106339	9.85672	0.52948	0.762217
SHC2	0.0630327	8.8221	0.529975	0.762217
LCOR	0.0633839	8.44804	0.530018	0.762217
ACOT12	-0.0619407	8.76106	0.531315	0.763407
STAT4	-0.0692345	8.78526	0.531701	0.763407
MMP7	0.247672	9.87112	0.53211	0.763407
IDO1	-0.0712149	8.62224	0.533133	0.76427
POU2F2	-0.0629133	8.64046	0.535572	0.767126
PIK3R5	-0.06119	8.77858	0.535972	0.767126
VTCN1	-0.0583931	9.13179	0.537159	0.768218
MLH1	-0.0633375	8.76298	0.537956	0.768395
ITCH	0.0539658	8.87032	0.53858	0.768395
NDUFA6	-0.0583926	9.37693	0.53914	0.768395
ST6GAL1	-0.049998	9.07614	0.539471	0.768395
PIK3CB	-0.0591412	9.01566	0.539602	0.768395
MAPK14	-0.0609972	9.52547	0.539827	0.768395
HERC6	0.0484394	8.90565	0.540404	0.76859
IFIH1	-0.0646442	8.82051	0.540813	0.76859
DDB2	-0.0552113	8.98052	0.54162	0.769135
PRDX5	0.0557494	10.2916	0.542064	0.769156
PLA2G3	0.0599546	8.63035	0.542485	0.769156
CD200	-0.0620975	8.94472	0.543628	0.770176
SSX4	-0.0618792	9.12635	0.547038	0.774401
CAMK2B	-0.0576839	8.65618	0.547686	0.774713
RAF1	-0.052117	9.05375	0.54948	0.776518
STAT3	0.059882	9.64736	0.54982	0.776518
CRLF2	0.0729249	8.16187	0.551112	0.776589
GPT	-0.0770052	9.44686	0.551162	0.776589
NDC80	-0.0589708	8.76914	0.551318	0.776589
CLEC4A	0.0581419	8.6776	0.551584	0.776589
MFGE8	0.0543092	8.93338	0.553163	0.778208
FEN1	-0.0568157	8.98474	0.553893	0.77863
CCL14	-0.0695278	8.4169	0.555016	0.779603
IFNB1	0.057122	8.53895	0.556097	0.780022
TPR	-0.0536906	9.16035	0.556175	0.780022
EP300	0.0516725	9.04326	0.558089	0.782101
DPP4	0.0678695	8.88316	0.559825	0.783631
IL2RB	-0.0595712	8.81121	0.560365	0.783631
CD1D	0.0523277	8.61234	0.560478	0.783631
CACNA1G	-0.0611155	8.67139	0.561926	0.784378
PHGDH	-0.0633773	8.73941	0.562372	0.784378
NKG7	-0.0563014	8.78895	0.56259	0.784378
FANCB	0.0543169	8.76995	0.562744	0.784378
PSMB8	-0.0603234	9.41547	0.564429	0.785754
IL4	-0.0640167	8.40074	0.564946	0.785754
BTLA	0.0558998	8.57809	0.565032	0.785754
CEACAM1	-0.0582967	8.855	0.567032	0.786515
IL24	-0.0565276	8.85482	0.567032	0.786515
AXL	-0.0585327	8.83123	0.56707	0.786515
BRD3	-0.0689871	8.2927	0.567588	0.786515
HES1	0.065659	9.53572	0.567749	0.786515
PRKAR2B	-0.0620428	8.6638	0.568827	0.787406
DST	-0.0853389	9.42455	0.571281	0.790199
KLRK1	0.0516767	8.70724	0.572005	0.790597
MAGEC1	-0.0531525	8.99122	0.572471	0.790638
FGF22	0.0676644	8.6521	0.572926	0.790665
CASP3	0.0533536	8.74593	0.573852	0.791339
PC	-0.0580991	8.49659	0.574382	0.791468
TMEM45B	-0.0591366	9.15553	0.577477	0.794837
FAS	0.0513887	8.69648	0.577704	0.794837
F13A1	-0.0572184	8.90579	0.579775	0.797081
MSRB2	0.0453143	8.9285	0.581724	0.799154
NDUFA11	-0.0516544	9.61198	0.583106	0.800189
CXCL6	0.0563003	8.42193	0.583361	0.800189
CLEC4E	0.0502544	8.56898	0.584426	0.801043
CFD	-0.0869666	9.5367	0.585366	0.801725
STAT1	0.0573574	9.55078	0.587067	0.803448
ROR2	0.0551711	8.64097	0.587951	0.80405
PLCB4	0.0429537	8.80502	0.588773	0.804418
ITGB4	-0.0821175	9.92722	0.589107	0.804418
CCRL2	0.0501833	8.71967	0.591454	0.807014
SOX10	-0.057076	8.73288	0.59235	0.807264
TNFSF9	-0.0563957	8.67097	0.592672	0.807264
GZMB	0.0553998	8.60738	0.592973	0.807264
FCER1G	-0.0448398	8.99305	0.595582	0.810207
ELMO1	0.0548068	8.6885	0.596515	0.810716
TIAM1	-0.0523387	8.9274	0.596852	0.810716
CHEK2	0.0570892	8.45012	0.59904	0.812726
ACVR1B	0.0463653	9.25207	0.599228	0.812726
IRF8	-0.0563055	9.15108	0.599775	0.812859
IL12RB2	0.0519402	8.50489	0.601783	0.81445
BRIP1	-0.053522	8.72117	0.601848	0.81445
F12	0.0681033	8.50451	0.60325	0.815143
TLR8	0.0452328	8.69356	0.60326	0.815143
MEFV	-0.0628192	8.35237	0.604198	0.81555
CDKN1C	-0.0732428	9.00696	0.604833	0.81555
SLC7A5	-0.0539358	8.83875	0.605235	0.81555
MYCN	-0.0511837	8.93789	0.605362	0.81555
SPP1	-0.091016	8.54471	0.606573	0.816575
NDUFA3	0.0453742	10.2367	0.608918	0.819124
CD40	0.0498641	9.31405	0.610435	0.820555
DKK4	0.0435547	8.72969	0.611033	0.82075
EWSR1	0.0521916	10.0522	0.611739	0.820897
HSPA2	-0.0559528	8.65434	0.612048	0.820897
FCAR	0.0484752	8.59848	0.612687	0.821145
TBK1	-0.052899	8.82514	0.614376	0.822801
GPSM3	-0.0521983	8.59281	0.61753	0.826388
SELENOK	0.0578081	8.39256	0.617967	0.826388
WNT2B	-0.0489489	9.08906	0.620023	0.828241
PPP2CB	-0.0494446	9.28502	0.620267	0.828241
CDKN2C	-0.055758	8.71985	0.620924	0.828508
KRT5	-0.0570234	9.33319	0.623009	0.830679
GDF15	-0.0983872	9.71777	0.624406	0.831406
TNFSF11	0.0468374	8.56192	0.624928	0.831406
EHHADH	0.0423762	9.01674	0.624931	0.831406
PRKCG	0.0496475	8.5941	0.626063	0.831437
PRG2	-0.047231	8.89975	0.62623	0.831437
TRAF6	0.0373547	9.10017	0.626342	0.831437
CSF2	-0.050234	8.80334	0.62679	0.831437
AXIN1	-0.0436062	9.1825	0.627427	0.831621
CACNB2	-0.0512023	8.54748	0.628093	0.831621
PPP2R2B	0.0509308	8.46952	0.628536	0.831621
CX3CL1	-0.0517116	8.45871	0.628764	0.831621
CXCR6	0.0475683	8.69284	0.629342	0.831778
SH2D1B	0.0404073	8.72225	0.63019	0.832292
RAB7A	-0.0530783	10.1104	0.630764	0.832443
PSEN1	0.039523	9.15519	0.632642	0.834268
SMAD9	0.060199	8.6926	0.633068	0.834268
SPA17	0.0445983	8.66136	0.635032	0.835979
PRKACB	0.0408693	9.25791	0.635289	0.835979
IL17B	0.0546192	8.5949	0.636966	0.837578
CLCF1	-0.0480031	8.65531	0.639171	0.839868
MNAT1	-0.0451576	9.00826	0.640247	0.840673
CCL22	0.0536015	8.23918	0.641734	0.842015
SELL	0.0594723	8.08162	0.642706	0.84268
JAM3	0.0472156	8.7349	0.64362	0.843267
MPO	-0.0454429	8.87978	0.645339	0.844909
NODAL	0.0410753	8.59312	0.646765	0.845735
CREB3L3	-0.0559792	8.50688	0.646904	0.845735
TXN2	0.0423846	9.51422	0.648357	0.846282
FPR1	-0.0488671	8.64174	0.649495	0.846282
GIMAP4	0.042495	8.70458	0.649508	0.846282
IFI6	-0.0547947	9.73923	0.649596	0.846282
ATG5	0.0649175	9.07411	0.649657	0.846282
IL17RA	0.0423155	8.74223	0.650324	0.846542
CDH11	0.0355318	8.77045	0.650879	0.846656
HSD17B8	0.0495794	8.52693	0.651932	0.847167
BRD7	-0.0477419	8.9832	0.652244	0.847167
CHAD	-0.0521602	8.51409	0.652812	0.847167
EGR2	-0.042683	8.83957	0.653142	0.847167
PTEN	0.0465581	9.48513	0.654341	0.848116
CCL8	0.0533826	8.20694	0.656377	0.849976
CD70	-0.044415	8.73282	0.656936	0.849976
NTHL1	0.039288	8.75883	0.657183	0.849976
COL5A1	-0.0510529	10.1137	0.659135	0.8514
IL1RL2	0.0358931	8.93969	0.659616	0.8514
BIRC5	-0.051952	8.53172	0.659694	0.8514
ITGA7	-0.0535351	8.29574	0.660578	0.851934
LILRA4	-0.0521326	8.51687	0.661722	0.852658
IL5RA	0.0494217	8.39784	0.662842	0.852658
SPANXB1	-0.0552851	8.79683	0.663494	0.852658
SELPLG	0.0398808	8.78283	0.664106	0.852658
C3AR1	0.0435737	8.46613	0.664759	0.852658
DKK2	0.0532476	8.4768	0.665047	0.852658
GTF2H3	0.0365318	8.87161	0.665159	0.852658
AMER1	-0.0525872	8.49323	0.66585	0.852658
BAD	0.033311	9.01793	0.66616	0.852658
SYK	0.0366282	9.04014	0.666234	0.852658
LYN	0.031363	9.08533	0.666316	0.852658
FANCE	-0.0432763	8.7199	0.667209	0.852712
CXCL10	0.0446899	8.57486	0.667299	0.852712
IL19	0.042699	8.68548	0.669323	0.854696
IL2RA	-0.0498775	8.67212	0.670015	0.854977
MAML2	-0.0436454	8.90853	0.671442	0.855789
IRAK2	-0.0376495	8.79731	0.671596	0.855789
WNT5A	0.0526831	8.27841	0.674915	0.859414
SLC16A1	-0.0489978	9.65052	0.675429	0.859465
TLR7	0.0353711	8.81314	0.677445	0.861424
IL18	0.0328006	8.96455	0.678123	0.861682
TARP_TRGC1_2	0.0427973	8.42528	0.678685	0.861792
NTRK1	0.0435203	8.60033	0.681876	0.8647
ADGRE5	-0.0450415	9.49286	0.68193	0.8647
WNT10A	-0.040402	8.85081	0.683567	0.865756
MBNL3	0.0308205	8.82845	0.684021	0.865756
CD3EAP	0.0303434	9.00321	0.684195	0.865756
NSD3	-0.0430867	8.85845	0.685513	0.866817
MS4A1	0.0350268	8.65865	0.689552	0.871027
ESR2	0.0388937	8.68692	0.689803	0.871027
CLU	0.0873829	11.204	0.690462	0.871252
ADGRE1	-0.0454803	8.78025	0.694197	0.87432
LGR5	-0.0441562	8.45396	0.694306	0.87432
OAZ1	-0.0554195	10.8133	0.69455	0.87432
CDKN2D	-0.0399123	8.6043	0.694824	0.87432
MED12	-0.0365337	9.10364	0.698116	0.877853
CR1	-0.0497971	8.25351	0.699767	0.879047
CACNB4	0.039748	8.36647	0.700618	0.879047
KBTBD8	0.037265	8.3787	0.700808	0.879047
CYP19A1	-0.048979	8.62373	0.701408	0.879047
APOA1	0.045339	8.42513	0.701491	0.879047
ATG16L1	0.0334437	8.80301	0.703614	0.881098
CCL2	-0.0696061	9.49611	0.704932	0.882138
CD34	-0.0377684	9.05919	0.705652	0.88243
SMC1A	-0.0383998	9.1898	0.709061	0.885318
TOP2A	0.031196	8.95419	0.709139	0.885318
CDH3	-0.0433887	8.66333	0.709954	0.885318
RYBP	0.0311353	8.85374	0.709963	0.885318
DUOX1	0.0332161	8.75538	0.710404	0.885318
HSP90B1	-0.0667086	10.4275	0.712858	0.887766
LGALS9	-0.0407255	9.68615	0.713588	0.888065
MARCO	-0.0360501	8.91398	0.714116	0.888112
COX5B	0.0508514	10.7091	0.714713	0.888244
PIM1	-0.0349846	9.03142	0.716127	0.888381
DAXX	0.032538	8.878	0.716261	0.888381
ICAM4	-0.0397264	8.29645	0.716613	0.888381
TLX1	0.0275491	8.81571	0.716784	0.888381
RNLS	0.038348	8.62591	0.717531	0.888698
CMA1	-0.0401956	8.67626	0.71964	0.890208
STMN1	-0.0375726	9.01385	0.72005	0.890208
CKLF	-0.0329526	9.29323	0.720223	0.890208
MERTK	-0.0408233	8.84798	0.722065	0.891876
CCL13	0.0360822	8.47377	0.724704	0.893726
TRIM21	-0.0350941	9.00729	0.725066	0.893726
MCM5	0.0273322	9.23283	0.725517	0.893726
GPX1	-0.0499296	10.191	0.725536	0.893726
NCR1	-0.0355668	8.65252	0.728756	0.896514
SRD5A2	0.0258906	8.88116	0.729181	0.896514
JADE1	0.0314534	8.81069	0.730131	0.896514
DUSP5	0.0366703	8.80136	0.730241	0.896514
NOS3	-0.0360777	8.6249	0.730273	0.896514
EGF	0.036242	8.35364	0.73206	0.897091
CTAGE1	0.0392642	8.3886	0.732191	0.897091
IDH1	0.049623	9.54783	0.732228	0.897091
CD244	-0.0443913	8.45738	0.733405	0.897925
RPS6KA5	-0.0385728	8.6828	0.73486	0.89793
LTA	-0.0366018	8.75242	0.735582	0.89793
DIPK2B	0.0473871	8.66608	0.735961	0.89793
PNOC	-0.0410297	8.61727	0.735991	0.89793
BAG1	0.0309361	8.8088	0.736855	0.89793
WDR76	0.034451	8.79055	0.737118	0.89793
FGFR3	0.0356251	8.80715	0.737247	0.89793
ATG7	0.0320748	8.77224	0.737373	0.89793
HLA_DRB4	0.0732703	9.92133	0.740036	0.900568
SETD2	0.0255165	9.10862	0.742815	0.90295
DDIT3	0.0286601	9.08759	0.743456	0.90295
CDH1	-0.0426622	9.82975	0.743489	0.90295
PIAS4	0.0327713	8.77844	0.744073	0.903034
HAVCR2	-0.035848	9.01499	0.74508	0.903034
OTOA	-0.0344236	8.83107	0.745152	0.903034
RIMKLA	-0.0448065	8.236	0.746254	0.903034
OASL	-0.0312316	8.70362	0.746419	0.903034
GNG7	0.0294763	8.48625	0.74749	0.903034
COL11A1	-0.0417221	8.64106	0.747884	0.903034
HDAC6	-0.0324816	9.20156	0.748064	0.903034
PRMT8	-0.0361991	8.7144	0.748363	0.903034
PYCR1	0.0330369	8.8897	0.748542	0.903034
CACNA1H	0.0421966	8.40626	0.750922	0.905154
C1QA	-0.0416322	9.3198	0.751298	0.905154
AR	0.0331637	8.69294	0.752441	0.905929
RXRG	0.032948	8.59149	0.753928	0.907116
DACH2	-0.0405206	8.19055	0.75449	0.907191
TRAF1	0.0292507	8.87973	0.755355	0.907628
MPL	-0.0352993	8.65381	0.757644	0.909072
PEBP1	-0.0338376	10.306	0.759146	0.909072
TDO2	0.0291347	8.70846	0.759188	0.909072
FADD	0.0359995	8.68913	0.759562	0.909072
PPL	-0.0353475	8.76877	0.759702	0.909072
ATP11C	-0.0347432	8.73613	0.759712	0.909072
FPR3	0.0262025	8.65027	0.760291	0.909072
PPP3R2	-0.0329607	8.59888	0.761348	0.909072
CAPN2	-0.0363511	10.3457	0.761527	0.909072
PTGS2	-0.0464567	8.80206	0.761574	0.909072
SERPINB2	-0.0342605	8.70613	0.763739	0.911057
ACY1	0.0344838	9.20896	0.764569	0.911397
ACVR2A	-0.0350069	8.82993	0.76503	0.911397
NOG	-0.0319334	8.8392	0.766795	0.912467
EGR1	-0.0854957	10.4746	0.76704	0.912467
LIF	0.0362261	8.79843	0.768621	0.912467
CACNA2D1	-0.0276564	8.96033	0.76896	0.912467
TNFSF15	-0.0345515	8.60273	0.769286	0.912467
POLR2A	-0.0344851	9.55779	0.76937	0.912467
MMP3	0.0217176	8.84872	0.769454	0.912467
ATP5F1D	-0.0355785	10.3731	0.770221	0.91278
PSMB7	-0.0265006	9.14086	0.771723	0.91371
KRT1	-0.0345801	8.86498	0.772014	0.91371
TFE3	-0.0299168	8.84221	0.774023	0.914269
PAX8	0.0290316	8.67302	0.77415	0.914269
CXXC5	-0.0363439	8.74114	0.774749	0.914269
COL4A4	-0.0272972	8.59349	0.775256	0.914269
CSF3R	0.0373807	8.8678	0.775511	0.914269
SLC2A1	0.0254088	9.04736	0.775514	0.914269
CD80	0.0225598	8.65045	0.781933	0.921237
MUTYH	-0.0309841	8.55803	0.783383	0.922083
ABCF1	-0.0262289	9.11089	0.783714	0.922083
ETS2	-0.0501478	9.93759	0.784337	0.922083
NDUFB1	0.0271491	9.7572	0.784978	0.922083
POLR2H	-0.027147	9.11773	0.785196	0.922083
PLA2G4F	0.0275328	8.89282	0.787941	0.923699
SOD1	-0.0383133	10.5843	0.788242	0.923699
TPO	0.0277396	8.33987	0.788797	0.923699
DDX43	0.0299816	8.63784	0.789571	0.923699
CSF1	-0.0308292	8.85061	0.789654	0.923699
PFKM	-0.0365634	8.46858	0.78986	0.923699
TSC1	0.0320048	8.83295	0.790203	0.923699
MCAT	0.0204599	8.80567	0.791173	0.923699
GNG4	0.0263194	8.55492	0.791881	0.923699
NANOG	0.0181088	9.14264	0.79327	0.923699
BMI1	-0.0272129	8.76391	0.793342	0.923699
PRUNE1	0.0307785	8.4896	0.793576	0.923699
MICA	-0.0271143	9.14721	0.794145	0.923699
LAMC3	0.0267658	8.45546	0.794408	0.923699
FANCC	-0.029768	8.26802	0.794415	0.923699
LAG3	0.0273083	8.70417	0.794728	0.923699
SOX9	-0.0275809	9.67843	0.796107	0.924709
FGF12	-0.0348159	8.82492	0.797979	0.926289
CALML5	-0.0270665	8.55301	0.799633	0.927615
IHH	-0.0275207	9.1966	0.800496	0.928022
LRP6	0.0283086	8.47579	0.80174	0.92887
EIF2AK2	-0.027074	9.11652	0.803303	0.930087
ITGA5	0.0316637	8.75997	0.804305	0.930652
ADA	0.0287749	8.87009	0.806478	0.93257
IL1B	-0.0280599	8.87727	0.807872	0.933008
IFNL2	-0.0246919	8.697	0.807886	0.933008
ILF3	0.0272516	9.98825	0.808733	0.933391
DEFB1	-0.0322427	9.08624	0.810086	0.934357
FCER1A	-0.0255918	8.8626	0.811848	0.935202
IL3	0.0243646	8.59825	0.813043	0.935202
CXCL11	0.0252654	8.34175	0.81346	0.935202
CFI	0.0290629	8.89884	0.813769	0.935202
JAK3	0.02207	8.73392	0.814949	0.935202
TCF7	0.0218811	8.7342	0.814949	0.935202
CLEC14A	-0.023333	8.7092	0.814965	0.935202
KRAS	0.0170671	8.88342	0.81503	0.935202
SFXN1	0.0202305	9.00305	0.815463	0.935202
BAMBI	-0.0296345	8.39224	0.816142	0.935389
TMEM140	0.0236695	8.81417	0.818361	0.937339
MIF	0.0329646	10.0021	0.819553	0.938111
PLCE1	0.0161659	8.85455	0.823182	0.94167
TRAF2	-0.0281994	9.13051	0.824306	0.941885
LTBP1	0.0206704	9.30319	0.824629	0.941885
MRPL19	-0.0265023	9.26491	0.824929	0.941885
ANLN	0.0130406	8.91129	0.826913	0.943556
ITGA1	0.0182432	8.86161	0.829656	0.946021
LY96	0.0152496	8.85224	0.830118	0.946021
NID2	-0.0306836	8.57639	0.832047	0.947141
MIB1	0.0185387	8.93415	0.832294	0.947141
FASLG	0.0203356	8.66102	0.832669	0.947141
CD47	-0.0284357	9.58167	0.833767	0.947148
IL13	-0.0254145	8.35469	0.83435	0.947148
RAC2	-0.0183199	8.27521	0.834551	0.947148
PLA2G5	-0.0285557	8.54801	0.834765	0.947148
NLRP3	-0.0280787	8.65501	0.838117	0.950355
LAMP2	0.0199166	8.31987	0.839211	0.951001
PIK3CG	0.0261854	8.45985	0.841756	0.952589
HMGN5	0.0186357	8.45959	0.841756	0.952589
NFKBIA	-0.025515	9.75167	0.842189	0.952589
SH2B2	-0.0165201	9.03279	0.844143	0.954203
PHF6	-0.0269528	8.78295	0.845773	0.955093
CARD11	-0.0169343	8.65774	0.845985	0.955093
FGF6	-0.0235143	8.5427	0.849411	0.958154
CLEC5A	-0.0259225	8.72255	0.849754	0.958154
BRCA1	-0.0272445	8.6411	0.850516	0.958417
NFAM1	-0.0203101	8.78583	0.853263	0.959968
KRT19	-0.0429778	10.8091	0.853296	0.959968
SHC1	-0.0196575	9.5742	0.853937	0.959968
EOMES	0.0211604	8.53071	0.854123	0.959968
RASGRF1	-0.0222939	8.75127	0.854541	0.959968
WNT3	0.0193952	8.74574	0.8571	0.961944
ACSF3	0.0172634	9.2054	0.857695	0.961944
ATF3	0.043024	9.26004	0.857893	0.961944
SIGLEC5	-0.0223258	8.64434	0.858438	0.96196
MCAM	0.0140278	9.25543	0.860205	0.963345
IL25	0.0208767	8.51724	0.862647	0.965377
PBK	-0.0243873	8.62663	0.863086	0.965377
SUV39H2	0.0132604	8.74286	0.864424	0.966278
ENG	0.013052	8.93037	0.865746	0.96647
CHIT1	-0.0206593	8.53345	0.86599	0.96647
CCNB1	0.013818	8.71452	0.866196	0.96647
CD1C	0.0111052	8.70451	0.866792	0.96654
SERPINA1	-0.0819917	10.8703	0.869083	0.968229
SF3A1	-0.0148349	9.39061	0.869725	0.968229
NFATC3	0.00964223	9.13093	0.86991	0.968229
MAPK8	0.00883584	9.16604	0.872768	0.970486
MAD2L2	0.013852	8.72183	0.873009	0.970486
SPOP	0.0137282	9.04943	0.876384	0.972532
NDUFA13	-0.0186445	10.6196	0.876875	0.972532
MAP2K1	-0.0240081	9.07777	0.877112	0.972532
ERO1A	-0.0158354	9.53163	0.877534	0.972532
FAP	0.0158738	8.52214	0.878036	0.972532
IL23R	0.0147548	8.64264	0.87807	0.972532
IRAK4	0.0156022	8.35268	0.879695	0.973737
IFNG	-0.0255166	8.65238	0.882178	0.974242
NFKB1	0.0126335	9.22724	0.882433	0.974242
ITK	-0.0198916	8.96443	0.883526	0.974242
TGFB1	-0.00805224	9.04563	0.884171	0.974242
RPA3	-0.0166721	8.30602	0.885545	0.974242
BAIAP3	0.0160505	8.84054	0.885871	0.974242
BST2	0.0167923	9.3617	0.886656	0.974242
NPM2	-0.0154981	8.90427	0.886873	0.974242
IFIT3	-0.0144298	8.63661	0.886994	0.974242
DUSP1	-0.0350561	10.057	0.889607	0.974242
TNFRSF11A	-0.0147043	9.00403	0.890111	0.974242
REN	0.0295209	8.50396	0.890409	0.974242
GTF3C1	-0.0173988	8.92793	0.890935	0.974242
NDUFA4L2	-0.0182155	9.04736	0.890958	0.974242
HCK	-0.0141613	8.75594	0.891	0.974242
NR4A3	0.0142991	8.44131	0.891	0.974242
NDUFA2	0.0148345	9.62269	0.892119	0.974242
ITGAX	0.0171706	8.84799	0.892327	0.974242
DMBT1	0.0465227	10.0242	0.892359	0.974242
NDUFB10	0.0151011	9.83569	0.892466	0.974242
SAA1	0.0174919	8.63593	0.892912	0.974242
IKBKB	0.0104505	8.91355	0.893959	0.974242
ITGA4	0.0151487	8.6281	0.894146	0.974242
FGF3	0.0162123	8.38156	0.894653	0.974242
NUP107	0.0110401	8.72306	0.894683	0.974242
C4BPA	0.0137385	8.49261	0.895599	0.974242
RPL23	0.0234543	12.7188	0.895615	0.974242
CD1B	-0.0213924	8.73917	0.895716	0.974242
IFNL1	-0.0202732	8.37964	0.896246	0.974242
PRKAA2	-0.0235965	8.79237	0.896732	0.974242
TSHR	-0.0212268	8.59972	0.896819	0.974242
SIGLEC1	0.0101843	8.77637	0.897856	0.974785
ITGA2B	0.0200277	8.40265	0.901626	0.978032
NEFL	-0.0138435	8.93856	0.901927	0.978032
PLD1	0.0138515	9.05279	0.904624	0.979598
SMAD3	0.0128464	8.94141	0.905052	0.979598
REL	-0.0143975	8.89348	0.905748	0.979598
ANGPTL4	0.00400016	8.84304	0.906612	0.979598
TXK	0.00565545	8.74542	0.907413	0.979598
ALKBH2	-0.0174411	8.77	0.907577	0.979598
CX3CR1	0.00993816	8.43249	0.907691	0.979598
INPP5D	-0.0108154	8.86211	0.907696	0.979598
CXCR2	-0.0155327	8.5236	0.908985	0.980405
L1CAM	-0.0192326	8.68978	0.910219	0.981152
SH2D1A	0.00499922	8.78006	0.911799	0.982271
EPCAM	0.0164073	10.7627	0.912495	0.982436
C1QBP	0.0164104	9.69422	0.914817	0.984105
FOXM1	-0.0193852	8.77335	0.915131	0.984105
PPP2R2C	-0.0141633	8.34189	0.916084	0.984431
SERINC3	-0.0141014	9.43495	0.916925	0.984431
ROCK1	0.00763021	9.15706	0.917064	0.984431
STAG2	-0.0156427	9.33968	0.91773	0.984563
NFATC2	0.00889085	8.78606	0.918376	0.984673
IL6ST	-0.0175735	9.36337	0.919252	0.98503
MAP2K4	-0.0157609	9.06434	0.920447	0.98546
LAMB4	-0.0193616	8.2466	0.920742	0.98546
ATF1	0.00893941	8.8291	0.921763	0.98597
FGFR2	-0.00977604	9.17257	0.922916	0.986271
MLLT3	-0.0129682	8.82553	0.923132	0.986271
SPACA3	0.00991942	8.61583	0.92533	0.988036
EPOR	-0.00890054	8.76085	0.929626	0.992039
TET2	-0.013621	8.85489	0.934318	0.996459
IFIT2	0.00853926	8.38766	0.93575	0.997039
TP73	0.0115172	8.66169	0.936628	0.997039
IL17RB	-0.0143292	8.74917	0.936644	0.997039
ZNF205	-0.00869182	8.61542	0.937063	0.997039
PLA2G6	0.00786079	8.94614	0.938157	0.997505
PLK1	0.00246804	8.93824	0.938969	0.997505
CD37	0.00838134	9.39136	0.939152	0.997505
KRT17	-0.0186414	9.01299	0.941043	0.99885
NT5E	-0.00917411	8.78526	0.941521	0.99885
FLT3	0.00798424	8.40899	0.942412	0.998994
PPBP	-0.0131347	8.35294	0.942846	0.998994
PRKX	-0.0162467	8.60746	0.943721	0.998994
SOD2	0.0121714	10.0172	0.943862	0.998994
MAGEA4	-0.0109175	9.13485	0.944696	0.999293
CD96	-0.0151846	8.88247	0.945268	0.999315
JUP	-0.0116308	9.76654	0.94659	1
CCL24	0.0103368	8.58642	0.950872	1
STAT6	0.00552189	10.0192	0.951535	1
NCOR1	0.00783242	9.24034	0.951598	1
NFKBIZ	-0.0110391	9.70021	0.952637	1
PPP3R1	-0.0129843	9.11599	0.952722	1
FZD10	-0.0132063	8.62994	0.954395	1
IRF2	0.00445705	8.78302	0.954432	1
RHOA	-0.009796	9.88864	0.954606	1
KITLG	0.00141462	8.52251	0.956711	1
POLR1B	0.0028439	8.33306	0.957167	1
IL15RA	-0.00443069	8.33388	0.957675	1
POLR2D	0.00284579	8.88346	0.958194	1
MAPK8IP1	-0.0101871	8.93615	0.959423	1
HLA_DQA2	0.00161421	8.57441	0.959859	1
CCNO	-0.0114838	8.5535	0.960002	1
HNF1A	-0.0129606	9.0985	0.962808	1
HGF	0.0011632	8.69786	0.962849	1
MAP3K14	0.00169729	9.17497	0.965442	1
RHOB	-0.00876526	10.0131	0.966556	1
FCRL2	-0.00708059	8.72814	0.966972	1
SHC3	0.00333212	8.79546	0.96739	1
HLA_DMB	-0.00798536	9.08551	0.967941	1
IL17A	-0.0145211	8.27823	0.968412	1
SOST	0.00992589	8.3865	0.96926	1
NAT1	0.00488402	8.90403	0.969721	1
TGFB2	0.00122968	8.58851	0.973886	1
LEPR	0.00345895	8.23865	0.974015	1
MELK	-6.18652e-05	9.0403	0.97415	1
GADL1	-0.00687692	8.60923	0.974541	1
CD58	-0.0107551	8.94827	0.974646	1
CNTFR	-0.00917562	8.84432	0.974657	1
DSC3	-0.00979001	8.40936	0.974949	1
IL6R	0.0047723	8.64753	0.975591	1
APOL6	-0.00845107	9.05302	0.975638	1
RSAD2	-0.00683811	8.80294	0.976368	1
TNFSF13	-0.00184766	9.09369	0.976883	1
CD7	-0.00542984	8.75069	0.97697	1
FUT4	-0.000583904	8.69249	0.978231	1
IFIT1	-0.00939888	8.70563	0.978771	1
TRAC	0.00280468	8.99372	0.979601	1
COL4A6	-0.0128557	8.37824	0.979625	1
CXCL9	0.00631175	8.17078	0.980081	1
TGFBR1	-0.00775345	8.94278	0.980616	1
HLA_DPB1	0.00840788	8.7531	0.981062	1
C5	-0.0049298	8.41349	0.983605	1
S100A12	0.000814984	8.32142	0.983789	1
RANBP2	-0.00733757	9.48052	0.984182	1
FLG	-0.0110714	8.65261	0.987311	1
TNFRSF9	0.00743187	8.28344	0.987434	1
PAX5	-0.00108321	8.922	0.988146	1
BLK	-0.00715462	8.59408	0.98817	1
CDC7	0.00116068	8.44554	0.988211	1
PGR	-0.00731438	8.66132	0.988478	1
MST1R	-0.00191516	9.58763	0.990171	1
PLAT	0.00638459	9.07599	0.990402	1
SLAMF1	0.00552301	8.42427	0.990559	1
UTY	-0.0003372	8.90231	0.990675	1
CDC14A	0.000437645	8.77873	0.990695	1
NEIL1	0.00071838	8.97873	0.990708	1
MASP2	-0.00249238	8.82417	0.993383	1
MAP3K20	-0.00334807	9.04073	0.993509	1
LAT	0.00629207	8.29328	0.995231	1
PRF1	0.00110503	8.78545	0.997119	1
VEGFD	-0.0110376	8.7393	0.997503	1
CBL	0.00563951	8.57933	0.998041	1
HOXA9	-0.00283451	8.67165	0.999001	1
EIF4EBP1	-0.00224256	8.49667	0.999171	1
API5	-0.00715924	9.42116	0.999251	1
MLANA	-0.00868254	8.37479	1	1
RIMKLB	-0.00751719	8.58382	1	1
ALKBH3	-0.00656992	8.54083	1	1
NAALAD2	-0.00632355	8.80561	1	1
TNFRSF11B	-0.00542621	8.7547	1	1
DUSP10	-0.00522827	8.73233	1	1
APOB	-0.00519506	8.66015	1	1
BMP8A	-0.00514923	8.57682	1	1
FGF14	-0.00500617	8.66319	1	1
PALMD	-0.00453678	8.63859	1	1
ZAP70	-0.00436675	8.7146	1	1
FOSL1	-0.00387482	8.72239	1	1
ROPN1	0.00387265	8.62992	1	1
TCF3	-0.00373388	9.10582	1	1
PLA1A	-0.00372338	8.74095	1	1
GRB2	-0.00361071	8.96421	1	1
ERCC3	-0.0033532	9.04748	1	1
SLAMF6	-0.00309051	8.72961	1	1
CD300A	-0.00284344	9.00006	1	1
PRKCB	0.00166053	8.34076	1	1
C5AR1	-0.00129994	8.40929	1	1
NDUFB4	-0.00121656	10.3896	1	1
CD8B	-0.00120181	8.96333	1	1
SMARCB1	-0.00117825	9.1464	1	1
KRT6A	-0.000888594	8.34268	1	1
ERG	0.000753299	8.55538	1	1
BBS1	0.000575129	8.61972	1	1
CARD9	-0.000522961	8.3374	1	1
IL5	0.000324302	8.51346	1	1
