# Supplementary material
Source: HighWire-hosted journal article supplement (https://gut.bmj.com/content/gutjnl-2024-334589)
Supplement: inline-supplementary-material-13 [file inline-supplementary-material-13.xlsx]

## Sheet: Sheet1
Supplementary table 9 Reactome gene set enrichment analysis table CD45- PanCK- of WT regions vs tumor regions
	Description	setSize	enrichmentScore	NES	pvalue	p.adjust	qvalues	core_enrichment
R-HSA-1474244	Extracellular matrix organization	106	-0.626784	-2.47036	1e-10	7.26e-08	6.06316e-08	3682/4318/3685/3791/3383/7040/4320/1514/1462/4680/4017/871/3688/4314/2335/3371/4312/1290/3687/1520/3689/7057/2/1289/1278/1281/6696/1277/1293
R-HSA-1474228	Degradation of the extracellular matrix	38	-0.781996	-2.53131	3.20315e-09	1.16274e-06	9.7106e-07	4318/4320/1514/4314/2335/4312/1290/1520/2/1289/1278/1281/6696/1277/1293
R-HSA-216083	Integrin cell surface interactions	51	-0.710094	-2.48039	3.03772e-08	5.51346e-06	4.60455e-06	3682/3685/3791/3383/3688/2335/3371/1290/3687/3689/7057/1289/1278/1281/6696/1277/1293
R-HSA-3000178	ECM proteoglycans	37	-0.755292	-2.43226	1.10552e-07	1.33767e-05	1.11715e-05	3685/7040/1462/3688/2335/3371/1290/3687/1289/1278/1281/1277/1293
R-HSA-1474290	Collagen formation	33	-0.766565	-2.41309	1.77302e-07	1.60902e-05	1.34376e-05	4318/1514/4017/871/4314/1290/1520/1289/1278/1281/1277/1293
R-HSA-1650814	Collagen biosynthesis and modifying enzymes	21	-0.835381	-2.37682	2.40312e-07	1.76476e-05	1.47383e-05	871/1290/1289/1278/1281/1277/1293
R-HSA-1442490	Collagen degradation	22	-0.828554	-2.38111	2.4308e-07	1.76476e-05	1.47383e-05	4318/4320/1514/4314/4312/1290/1289/1278/1281/1277/1293
R-HSA-3000170	Syndecan interactions	17	-0.865919	-2.33801	1.02929e-06	6.22718e-05	5.2006e-05	2247/3685/7040/3688/2335/3371/1290/7057/1289/1278/1281/1277
R-HSA-2022090	Assembly of collagen fibrils and other multimeric structures	29	-0.768708	-2.34737	2.07342e-06	0.000107522	8.97962e-05	4318/1514/4017/4314/1290/1520/1289/1278/1281/1277/1293
R-HSA-8874081	MET activates PTK2 signaling	22	-0.803215	-2.30829	2.50633e-06	0.000121306	0.000101308	3688/2335/1290/1289/1278/1281/1277
R-HSA-8948216	Collagen chain trimerization	17	-0.848175	-2.2901	4.54649e-06	0.000206297	0.000172288	1290/1289/1278/1281/1277/1293
R-HSA-8875878	MET promotes cell motility	24	-0.78202	-2.27459	7.46218e-06	0.000318679	0.000266143	3688/2335/1290/1289/1278/1281/1277
R-HSA-3000171	Non-integrin membrane-ECM interactions	33	-0.718018	-2.26027	1.32358e-05	0.000533842	0.000445836	3685/7040/3688/2335/3371/1290/7057/1289/1278/1281/1277
R-HSA-186797	Signaling by PDGF	34	-0.674249	-2.14153	6.15966e-05	0.00212948	0.00177843	6772/1290/7060/7057/5159/1289/1281/6696/1293
R-HSA-977606	Regulation of Complement cascade	30	-0.685451	-2.1333	0.000116994	0.00353906	0.00295563	710/717/733/975/712/721/716/713/715/718
R-HSA-198933	Immunoregulatory interactions between a Lymphoid and a non-Lymphoid cell	76	-0.53401	-1.9892	0.000181147	0.00505819	0.00422432	2214/23547/3903/3383/4345/975/3688/54209/3689/1278/1281/718/1277
R-HSA-166663	Initial triggering of complement	16	-0.77674	-2.07349	0.000330345	0.00857949	0.00716512	717/712/721/716/713/715/718
R-HSA-419037	NCAM1 interactions	17	-0.771047	-2.08186	0.000509748	0.0123359	0.0103023	1290/1289/1281/1293
R-HSA-9006934	Signaling by Receptor Tyrosine Kinases	201	-0.373673	-1.61226	0.000552481	0.0129388	0.0108057	5581/3690/5879/1959/1302/6236/558/3265/5567/4915/5568/2247/5566/3398/3315/1499/3726/4318/3685/6772/3791/3688/2335/1290/7060/7057/5159/1289/1278/1281/6696/1277/1293
R-HSA-381426	Regulation of Insulin-like Growth Factor (IGF) transport and uptake by Insulin-like Growth Factor Binding Proteins (IGFBPs)	27	-0.6776	-2.03439	0.000630411	0.0143024	0.0119446	10272/1462/4240/2335/3371/4312/721/5265/6696/718
R-HSA-8957275	Post-translational protein phosphorylation	23	-0.681129	-1.97342	0.000911255	0.0191618	0.0160029	10272/1462/4240/2335/3371/721/5265/6696/718
R-HSA-6806834	Signaling by MET	37	-0.614321	-1.97829	0.000923778	0.0191618	0.0160029	3688/2335/1290/1289/1278/1281/1277
R-HSA-375165	NCAM signaling for neurite out-growth	28	-0.655689	-1.98498	0.00100498	0.0197194	0.0164686	1290/1289/1281/1293
R-HSA-166658	Complement cascade	37	-0.605183	-1.94887	0.00122731	0.0228468	0.0190804	710/717/733/975/712/721/716/713/715/718
R-HSA-6798695	Neutrophil degranulation	118	-0.416484	-1.68033	0.00153134	0.0267214	0.0223162	1604/1991/150372/634/6280/23601/3577/5329/8778/7097/4353/3958/1536/5879/1088/340061/684/2919/7133/1512/5788/6556/140885/3310/4973/1084/4318/3685/929/3934/3903/5328/29108/4680/4057/3687/1520/3689/2207/5265/968/718
R-HSA-202733	Cell surface interactions at the vascular wall	74	-0.477158	-1.76822	0.00281997	0.0417816	0.0348937	140885/4973/1084/3685/7040/4680/3688/2335/4312/3687/3689/972/2207/1278/1277
R-HSA-76009	Platelet Aggregation (Plug Formation)	13	-0.742563	-1.89901	0.00638392	0.0747537	0.0624302	2335/1278/1277
R-HSA-168249	Innate Immune System	349	-0.293742	-1.34276	0.00727748	0.0788574	0.0658574	8778/7097/4353/5602/1326/3958/5320/60/7128/1536/84433/3553/5581/5879/2205/1088/340061/64170/1191/684/920/3265/2919/10392/5567/26253/115004/5568/7133/1512/3665/5566/5788/6556/5699/140885/1499/10578/3310/2214/4973/1084/5300/4318/710/3685/929/3934/717/733/3903/3055/5328/9450/975/29108/1514/712/4680/4057/9636/721/3687/1520/54209/3689/716/713/2207/5265/968/715/718
R-HSA-1280218	Adaptive Immune System	217	-0.325014	-1.41542	0.0123275	0.107746	0.0899837	920/3265/353514/5567/11004/11065/911/5293/5568/1512/925/5566/5788/5699/2214/23308/23547/3685/929/5133/3903/3383/9021/4345/975/1514/3688/1520/54209/3689/972/1278/1281/718/1277
R-HSA-2173782	Binding and Uptake of Ligands by Scavenger Receptors	16	-0.657024	-1.75391	0.016624	0.118324	0.0988178	4035/1278/1281/1277
R-HSA-114604	GPVI-mediated activation cascade	22	-0.595942	-1.71262	0.0174084	0.119397	0.0997138	10630/2207/1278/1277
R-HSA-3000480	Scavenging by Class A Receptors	11	-0.714091	-1.73687	0.0210007	0.126288	0.105469	5648/1278/1281/1277
R-HSA-9675108	Nervous system development	118	-0.36142	-1.45817	0.0213959	0.126288	0.105469	9349/60/4684/3690/5879/1959/783/3265/5567/5293/5568/5566/5788/5699/4318/3685/2902/5979/3688/1290/54209/7852/100133941/1289/1281/1293
R-HSA-422475	Axon guidance	114	-0.363903	-1.46061	0.0244359	0.135423	0.113098	9349/60/4684/3690/5879/783/3265/5567/5293/5568/5566/5788/5699/4318/3685/2902/5979/3688/1290/54209/7852/100133941/1289/1281/1293
R-HSA-76002	Platelet activation, signaling and aggregation	82	-0.382543	-1.45093	0.0382765	0.198491	0.165769	5581/3690/5879/7042/1191/928/2316/710/7040/10630/2335/7057/2207/2/5265/1278/1277
R-HSA-5653656	Vesicle-mediated transport	55	-0.420472	-1.47696	0.045354	0.222973	0.186215	5879/7037/920/11004/7474/4035/5265/1278/1281/1277
R-HSA-1428517	The citric acid (TCA) cycle and respiratory electron transport	34	0.74194	2.36985	7.82365e-09	1.89332e-06	1.5812e-06	3418/5163/1337/1327/1329/4728/27089/29796/513/521/6389/4694/1340/3945/126328/4714/4695/4696/4713/51079/2271/4716/4707/3939/4701
R-HSA-1430728	Metabolism	250	0.420394	1.86597	4.14667e-08	6.02096e-06	5.02838e-06	124/3418/5163/1337/7316/3705/8399/1327/1329/4728/2792/6130/6794/2788/27089/2805/5695/2806/29796/2778/513/521/3248/2744/9524/6389/4946/3417/440/7314/4694/7173/8841/1340/3945/4942/348/126328/5698/335/4714/8503/26227/226/6095/4695/4036/435/4696/4713/29968/6576/5713/6233/2776/2239/51079/6194/5295/8140/2271/7276/5319/25828/5723/9915/7298/51365/5336/2746/4716/57122/4707/230/3098/5690/3939/4701/5575/883…
R-HSA-163200	Respiratory electron transport, ATP synthesis by chemiosmotic coupling, and heat production by uncoupling proteins.	27	0.756212	2.27823	1.49826e-07	1.55391e-05	1.29774e-05	1337/1327/1329/4728/27089/29796/513/521/6389/4694/1340/126328/4714/4695/4696/4713/51079
R-HSA-9707564	Cytoprotection by HMOX1	31	0.72767	2.25266	2.84234e-07	1.87594e-05	1.56669e-05	1337/7316/10628/1327/1329/4780/5695/7314/9817/8841/1340/5698/5713/6233
R-HSA-611105	Respiratory electron transport	25	0.743688	2.2178	1.63945e-06	9.15568e-05	7.64633e-05	1337/1327/1329/4728/27089/29796/6389/4694/1340/126328/4714/4695/4696/4713/51079/4716/4707/4701/4710
R-HSA-5628897	TP53 Regulates Metabolic Genes	19	0.747572	2.0594	3.31024e-05	0.00126486	0.00105634	1337/54541/1327/1329/25824/2744/208/1340
R-HSA-9711123	Cellular response to chemical stress	40	0.602058	1.99261	4.82375e-05	0.00175102	0.00146236	1337/7316/10628/1327/1329/4780/25824/5695/7314/9817/8841/1340/5698/4689/5713/6233
R-HSA-3700989	Transcriptional Regulation by TP53	114	0.449318	1.81278	7.78612e-05	0.00246951	0.0020624	1337/7316/54541/4869/1327/1329/25824/6794/639/6790/891/2744/7314/208/5934/1340/472/665/7027/843/5600/6233/4848/6923/4194/1647/27113/1017/10111/8797/3486/8793/1026/9134/83860/55615/7157/5437/1027/2821/1869/11200/9156/3066/1386/9212/9656/1111/207/898/2176/5111/253260
R-HSA-1640170	Cell Cycle	146	0.422859	1.7491	7.82351e-05	0.00246951	0.0020624	8357/7316/8358/4869/23243/595/1021/6790/5695/1028/891/7314/208/5934/472/7153/5698/7027/3306/5713/6233/7465/8355/4194/4609/1017/7298/10111/57122/5347/23594/2305/5690/8243/1026/9134/7015/1871/7157/5437/991/1027/2237/5889/1869/9088/5577/11200/4171/9156/5885/3014/9212/546/27127/83540/675/9656/9232/1111/4173/207/898/5111/8900/6500/1030/57804/5518/7468/1875/2033/9978/5595/8556/5903
R-HSA-2262752	Cellular responses to stress	138	0.416414	1.72624	0.000138835	0.00403178	0.00336713	1337/8357/7316/8358/10628/1327/1329/4780/25824/6130/3303/1021/5695/440/7314/9817/8841/1340/472/5698/335/6095/7027/3306/2908/5600/4689/5713/6233/2146/8355/6194/6923/4194/25828/1017/10111/57122/3576/648/5690/1051/1026/9134/6667/1871/7157/5970/6175/1027/5601/1869
R-HSA-6799198	Complex I biogenesis	17	0.718225	1.89022	0.000330889	0.00857949	0.00716512	4728/4694/126328/4714/4695/4696/4713/51079/4716/4707/4701/4710
R-HSA-8953897	Cellular responses to external stimuli	139	0.410363	1.69972	0.000352169	0.00881637	0.00736296	1337/8357/7316/8358/10628/1327/1329/4780/25824/6130/3303/1021/5695/440/7314/9817/8841/1340/472/5698/335/6095/7027/3306/2908/5600/4689/5713/6233/2146/8355/6194/6923/4194/25828/1017/10111/57122/3576/648/5690/1051/1026/9134/6667/1871/7157/5970/6175/1027/5601/1869
R-HSA-69278	Cell Cycle, Mitotic	111	0.416687	1.67569	0.000675624	0.0148637	0.0124134	8357/7316/8358/595/1021/6790/5695/1028/891/7314/208/5934/7153/5698/7027/5713/6233/7465/8355/4609/1017/7298/57122/5347/23594/2305/5690/8243/1026/9134/1871/7157/991/1027/2237/1869/9088/5577/4171/5885/3014/9212/83540/9232/4173/207/898/5111/8900/6500/1030/57804/5518/1875/2033/9978/5595/8556/5903
R-HSA-418346	Platelet homeostasis	16	0.695267	1.80097	0.000955009	0.0192593	0.0160844	5175/2792/2788/2778/488/5781
R-HSA-453279	Mitotic G1 phase and G1/S transition	67	0.461099	1.69041	0.00122625	0.0228468	0.0190804	7316/595/1021/5695/1028/891/7314/208/5934/7153/5698/7027/5713/6233/7465/4609/1017/7298/23594/5690/1026/9134/1871/1027/1869/4171/4173/207/898/5111/8900/6500/1030/5518
R-HSA-9707587	Regulation of HMOX1 expression and activity	18	0.662097	1.77889	0.00149532	0.0267214	0.0223162	7316/4780/5695/7314/9817/5698/5713/6233
R-HSA-8932339	ROS sensing by NFE2L2	15	0.688409	1.7692	0.00155856	0.0267214	0.0223162	7316/4780/5695/7314/9817/5698/5713/6233
R-HSA-8939236	RUNX1 regulates transcription of genes involved in differentiation of HSCs	26	0.61571	1.85246	0.00158267	0.0267214	0.0223162	8357/7316/8358/5695/7314/5698/5713/6233/8355/6929/83737
R-HSA-75815	Ubiquitin-dependent degradation of Cyclin D	14	0.695826	1.76607	0.00185942	0.0306805	0.0256227	7316/595/5695/7314/5698/5713/6233
R-HSA-2559580	Oxidative Stress Induced Senescence	35	0.551846	1.77376	0.0019353	0.0312228	0.0260756	8357/7316/8358/1021/7314/7027/5600/6233/2146/8355/4194/648/1871/7157/5601/1869/3014
R-HSA-71291	Metabolism of amino acids and derivatives	54	0.483135	1.70433	0.00199942	0.0315561	0.0263539	6130/2805/5695/2806/2744/4946/440/7173/4942/5698/26227/435/29968/5713/6233/6194/8140/25828/5723/2746/5690/883/2752
R-HSA-9682385	FLT3 signaling in disease	18	0.652488	1.75307	0.00211857	0.0327252	0.0273303	7316/6777/7314/5781/2323/6654/6233/5295/598/4893/3845/1026
R-HSA-2559583	Cellular Senescence	61	0.466788	1.68068	0.00225397	0.0340913	0.0284712	8357/7316/8358/1021/7314/472/7027/5600/6233/2146/8355/4194/1017/10111/3576/648/1051/1026/9134/6667/1871/7157/5970/1027/5601/1869/3014/3569/3552
R-HSA-382556	ABC-family proteins mediated transport	14	0.67903	1.72344	0.00303201	0.0440248	0.0367671	7316/5695/7314/5698/335/5713/6233
R-HSA-69231	Cyclin D associated events in G1	34	0.534168	1.7062	0.0032039	0.0447313	0.0373572	7316/595/1021/1028/7314/5934/7027/6233/1017/1026/9134/1871/1027/1869/898/6500/1030/5518/1875
R-HSA-69236	G1 Phase	34	0.534168	1.7062	0.0032039	0.0447313	0.0373572	7316/595/1021/1028/7314/5934/7027/6233/1017/1026/9134/1871/1027/1869/898/6500/1030/5518/1875
R-HSA-5619084	ABC transporter disorders	12	0.691387	1.71338	0.00332287	0.0455171	0.0380134	7316/5695/7314/5698/335/5713/6233
R-HSA-983705	Signaling by the B Cell Receptor (BCR)	50	0.482267	1.66756	0.00396807	0.0533485	0.0445538	973/7316/29760/5695/7314/5698/6654/4772/5713/6233/5295/1147/4792/5336/930/5690/4893/3845
R-HSA-69563	p53-Dependent G1 DNA Damage Response	24	0.57097	1.68921	0.00428589	0.0553749	0.0462462	7316/5695/7314/472/5698/5713/6233/4194/1017/5690/1026/9134/7157/1027/11200
R-HSA-69580	p53-Dependent G1/S DNA damage checkpoint	24	0.57097	1.68921	0.00428589	0.0553749	0.0462462	7316/5695/7314/472/5698/5713/6233/4194/1017/5690/1026/9134/7157/1027/11200
R-HSA-69206	G1/S Transition	53	0.468086	1.64458	0.00434762	0.0553749	0.0462462	7316/595/5695/891/7314/208/5934/5698/7027/5713/6233/7465/4609/1017/7298/23594/5690/1026/9134/1027/1869/4171/4173/207/898/5111/8900/6500/5518/1875
R-HSA-512988	Interleukin-3, Interleukin-5 and GM-CSF signaling	35	0.526917	1.69363	0.0046211	0.0578434	0.0483077	7316/1439/29760/6777/7314/5781/8503/3561/6654/6233/5295
R-HSA-69202	Cyclin E associated events during G1/S transition	36	0.512459	1.65068	0.00483215	0.0594601	0.0496578	7316/595/5695/7314/208/5934/5698/7027/5713/6233/7465/4609/1017/5690/1026/9134
R-HSA-182971	EGFR downregulation	10	0.728969	1.71281	0.00562025	0.068005	0.0567941	7316/7314/6233/1956
R-HSA-416482	G alpha (12/13) signalling events	12	0.666649	1.65208	0.00629081	0.0747537	0.0624302	388/2792/2788/6654
R-HSA-8854050	FBXL7 down-regulates AURKA during mitotic entry and in early mitosis	15	0.646484	1.66146	0.00669999	0.0772094	0.0644811	7316/6790/5695/7314/5698/5713/6233
R-HSA-9010553	Regulation of expression of SLITs and ROBOs	18	0.617833	1.65996	0.00696601	0.0788574	0.0658574	7316/6130/5695/7314/5698/5713/6233/6194/6923
R-HSA-69656	Cyclin A:Cdk2-associated events at S phase entry	37	0.502958	1.63765	0.00718018	0.0788574	0.0658574	7316/595/5695/7314/208/5934/5698/7027/5713/6233/7465/4609/1017/5690/1026/9134
R-HSA-2559582	Senescence-Associated Secretory Phenotype (SASP)	30	0.543979	1.67017	0.00720138	0.0788574	0.0658574	8357/7316/8358/1021/7314/6233/8355/1017/3576/1051/1026/5970/1027/3014/3569/3552
R-HSA-1266695	Interleukin-7 signaling	21	0.586971	1.66405	0.00786674	0.083989	0.0701431	8357/8358/6777/8503/3561/8355/5295/5896
R-HSA-1295596	Spry regulation of FGF signaling	12	0.658221	1.63119	0.00862372	0.0907366	0.0757783	7316/7314/5781/6233
R-HSA-177929	Signaling by EGFR	19	0.603495	1.6625	0.00972894	0.100903	0.0842687	7316/7314/5781/6654/6233/5295/1956/4893/3845
R-HSA-69620	Cell Cycle Checkpoints	68	0.415304	1.53093	0.00999988	0.102252	0.0853956	7316/5695/891/7314/472/5698/5713/6233/7465/4194/1017/10111/57122/5347/23594/5690/1026/9134/7157/991/1027/9088/11200/4171/9156/3014/9212/83540/9656/1111/4173/898
R-HSA-5358346	Hedgehog ligand biogenesis	12	0.650754	1.61269	0.0106986	0.105715	0.0882877	7316/5695/7314/5698/5713/6233
R-HSA-5387390	Hh mutants abrogate ligand secretion	12	0.650754	1.61269	0.0106986	0.105715	0.0882877	7316/5695/7314/5698/5713/6233
R-HSA-977225	Amyloid fiber formation	21	0.576455	1.63424	0.0107754	0.105715	0.0882877	8357/7316/8358/4069/7314/348/335/6233/8355/567/7276
R-HSA-8852276	The role of GTSE1 in G2/M progression after G2 checkpoint	16	0.627381	1.62513	0.0112598	0.107746	0.0899837	7316/5695/891/7314/5698/5713/6233/5347/5690/1026/7157
R-HSA-6806003	Regulation of TP53 Expression and Degradation	24	0.542862	1.60605	0.0115073	0.107746	0.0899837	7316/639/7314/208/472/6233/4194/1017/55615/7157/11200/207/253260/8900/5518
R-HSA-1500620	Meiosis	26	0.549323	1.65273	0.0119178	0.107746	0.0899837	8357/8358/472/3306/8355/1017/10111/8243/5889/5885/3014/27127/675
R-HSA-1236382	Constitutive Signaling by Ligand-Responsive EGFR Cancer Variants	14	0.626106	1.58911	0.0119774	0.107746	0.0899837	7316/7314/6654/6233/5295/1956/4893/3845
R-HSA-5637815	Signaling by Ligand-Responsive EGFR Variants in Cancer	14	0.626106	1.58911	0.0119774	0.107746	0.0899837	7316/7314/6654/6233/5295/1956/4893/3845
R-HSA-69541	Stabilization of p53	17	0.612696	1.61249	0.0123172	0.107746	0.0899837	7316/5695/7314/472/5698/5713/6233/4194/5690/7157/11200
R-HSA-68827	CDT1 association with the CDC6:ORC:origin complex	13	0.655933	1.6415	0.01234	0.107746	0.0899837	7316/5695/7314/5698/5713/6233/23594/5690
R-HSA-74160	Gene expression (Transcription)	297	0.287885	1.3011	0.0125528	0.107746	0.0899837	1337/8357/7316/8358/54541/10628/4869/1327/1329/8784/595/25824/650/6794/1021/639/6790/5695/891/1378/6427/2744/7314/79869/208/5934/8841/1340/472/348/2064/4094/6046/5698/5781/665/6095/7027/843/3977/2908/5600/5713/6233/2146/4848/8355/6929/6097/83737/2737/1956/6923/4194/4609/1647/5308/27113/1017/10111/23429/23451/8797/2903/57122/55294/4089/3486/58508/648/8289/5690/8793/1051/3845/6932/1026/9134/6667/83…
R-HSA-187577	SCF(Skp2)-mediated degradation of p27/p21	23	0.558061	1.63219	0.012604	0.107746	0.0899837	7316/595/5695/7314/5698/5713/6233/1017/5690/1026/9134
R-HSA-6791312	TP53 Regulates Transcription of Cell Cycle Genes	23	0.556554	1.62779	0.0127359	0.107746	0.0899837	4869/6790/891/5934/7027/4848/1647/1017/1026/9134/7157/1027/1869/898/5111/8900
R-HSA-69242	S Phase	58	0.426254	1.52335	0.0130394	0.107746	0.0899837	7316/595/5695/7314/208/5934/5698/7027/5713/6233/7465/4609/1017/23594/5690/8243/1026/9134/1027/2237/1869/4171/5885/4173/207/898/5111/8900/6500/57804/1875/9978
R-HSA-9659787	Aberrant regulation of mitotic G1/S transition in cancer due to RB1 defects	15	0.623164	1.60152	0.0130601	0.107746	0.0899837	595/1021/1028/7027/1017/1026/9134/1871/1027/1869
R-HSA-9661069	Defective binding of RB1 mutants to E2F1,(E2F2, E2F3)	15	0.623164	1.60152	0.0130601	0.107746	0.0899837	595/1021/1028/7027/1017/1026/9134/1871/1027/1869
R-HSA-349425	Autodegradation of the E3 ubiquitin ligase COP1	13	0.654114	1.63694	0.0133958	0.10874	0.0908139	7316/5695/7314/472/5698/5713/6233
R-HSA-3214858	RMTs methylate histone arginines	14	0.620602	1.57514	0.0136015	0.10874	0.0908139	8357/8358/595/8355
R-HSA-4641257	Degradation of AXIN	14	0.619986	1.57358	0.0137368	0.10874	0.0908139	7316/5695/7314/5698/5713/6233/8658/5690
R-HSA-165159	MTOR signalling	10	0.695299	1.63369	0.0137798	0.10874	0.0908139	6794/6198/208/6194/1978
R-HSA-69481	G2/M Checkpoints	46	0.460671	1.55565	0.0139328	0.108766	0.0908354	7316/5695/891/7314/472/5698/5713/6233/7465/1017/10111/23594/5690/7157/9088/11200/4171/9156/3014/9656/1111/4173
R-HSA-5668541	TNFR2 non-canonical NF-kB pathway	53	0.439259	1.5433	0.0141803	0.10952	0.0914652	608/7316/8784/330/115650/939/5695/23495/7314/5698/5713/6233/8995/1147/7187/3604
R-HSA-195721	Signaling by WNT	96	0.360908	1.42316	0.0144058	0.11009	0.0919415	8357/7316/8358/2792/2788/5880/5695/7314/208/5698/4772/5713/6233/8355/5881/7855/4040/7480/4609/8658/5690/4041/3845/6932/7015/27123/8324/81029/23236/3014/6657/50964/324/8322/6662/207
R-HSA-8953854	Metabolism of RNA	44	0.455885	1.52922	0.0147178	0.111303	0.0929546	7316/6130/3303/5695/6427/7314/79869/5698/5600/5713/6233/4848/6194/23451/57122/5690
R-HSA-8939902	Regulation of RUNX2 expression and activity	24	0.529551	1.56667	0.0149344	0.111777	0.0933502	7316/650/5695/7314/5698/2908/5713/6233
R-HSA-5619115	Disorders of transmembrane transporters	19	0.589212	1.62315	0.0150921	0.111805	0.0933731	7316/5695/7314/5698/335/5713/6233/57122/3098/5690
R-HSA-1632852	Macroautophagy	14	0.612925	1.55566	0.0153689	0.112705	0.0941251	7316/7314/472/6233
R-HSA-5632684	Hedgehog 'on' state	21	0.558202	1.5825	0.0155454	0.11286	0.0942545	64399/7316/5695/7314/5698/5713/6233/83737/2737
R-HSA-4641258	Degradation of DVL	12	0.642394	1.59197	0.0157688	0.113348	0.0946621	7316/5695/7314/5698/5713/6233
R-HSA-5676590	NIK-->noncanonical NF-kB signaling	17	0.601075	1.58191	0.0169948	0.119397	0.0997138	7316/5695/7314/5698/5713/6233/1147
R-HSA-8878171	Transcriptional regulation by RUNX1	70	0.397208	1.47234	0.0176713	0.119397	0.0997138	8357/7316/8358/8784/595/1021/5695/1378/7314/5698/5781/3977/5713/6233/8355/6929/83737/23429/58508/648/8289/5690
R-HSA-8948751	Regulation of PTEN stability and activity	16	0.609676	1.57927	0.0177524	0.119397	0.0997138	7316/5695/7314/208/5698/5713/6233/8658/5690
R-HSA-450531	Regulation of mRNA stability by proteins that bind AU-rich elements	20	0.576616	1.60641	0.0177659	0.119397	0.0997138	7316/3303/5695/7314/5698/5600/5713/6233
R-HSA-5693538	Homology Directed Repair	34	0.482123	1.53996	0.017926	0.119397	0.0997138	7316/7314/472/6233/1017/10111/5893/2237/5889/9156/3014/675/9656/1111/5111/8900/57804/7468
R-HSA-6804756	Regulation of TP53 Activity through Phosphorylation	33	0.488943	1.55357	0.017926	0.119397	0.0997138	7316/6794/6790/7314/472/5600/6233/4194/1017/10111/83860/7157/11200/9156/9212/1111
R-HSA-168927	TICAM1, RIP1-mediated IKK complex recruitment	12	0.637137	1.57894	0.0186358	0.120792	0.100879	7316/330/7314/6233/1147/11035/7189
R-HSA-180585	Vif-mediated degradation of APOBEC3G	13	0.638559	1.59802	0.018701	0.120792	0.100879	7316/5695/7314/5698/5713/6233/6923
R-HSA-5693565	Recruitment and ATM-mediated phosphorylation of repair and signaling proteins at DNA double strand breaks	18	0.582362	1.56466	0.018801	0.120792	0.100879	7316/7314/472/6233/2138/10111/7157/11200/3014/9656
R-HSA-5693606	DNA Double Strand Break Response	18	0.582362	1.56466	0.018801	0.120792	0.100879	7316/7314/472/6233/2138/10111/7157/11200/3014/9656
R-HSA-4641263	Regulation of FZD by ubiquitination	12	0.633931	1.571	0.0196783	0.12532	0.10466	7316/7314/6233/7855/4040/4041
R-HSA-1643713	Signaling by EGFR in Cancer	15	0.611971	1.57276	0.020809	0.126288	0.105469	7316/7314/6654/6233/5295/1956/4893/3845
R-HSA-212436	Generic Transcription Pathway	279	0.286148	1.28017	0.0208925	0.126288	0.105469	1337/8357/7316/8358/54541/10628/4869/1327/1329/8784/595/25824/650/6794/1021/639/6790/5695/891/1378/2744/7314/208/5934/8841/1340/472/348/2064/4094/6046/5698/5781/665/6095/7027/843/3977/2908/5600/5713/6233/2146/4848/8355/6929/6097/83737/2737/1956/6923/4194/4609/1647/5308/27113/1017/10111/23429/8797/2903/55294/4089/3486/58508/648/8289/5690/8793/1051/3845/6932/1026/9134/6667/83860/79885/55615/2904/36…
R-HSA-174113	SCF-beta-TrCP mediated degradation of Emi1	14	0.600487	1.52409	0.0213531	0.126288	0.105469	7316/5695/7314/5698/5713/6233
R-HSA-169911	Regulation of Apoptosis	11	0.668369	1.61503	0.0213538	0.126288	0.105469	7316/5695/7314/5698/5713/6233
R-HSA-211733	Regulation of activated PAK-2p34 by proteasome mediated degradation	11	0.668369	1.61503	0.0213538	0.126288	0.105469	7316/5695/7314/5698/5713/6233
R-HSA-5362768	Hh mutants are degraded by ERAD	11	0.668369	1.61503	0.0213538	0.126288	0.105469	7316/5695/7314/5698/5713/6233
R-HSA-5678895	Defective CFTR causes cystic fibrosis	11	0.668369	1.61503	0.0213538	0.126288	0.105469	7316/5695/7314/5698/5713/6233
R-HSA-2559585	Oncogene Induced Senescence	22	0.550361	1.58206	0.0219933	0.128239	0.107099	7316/1021/7314/7027/6233/4194/6667/1871/7157/1869
R-HSA-8951664	Neddylation	26	0.52365	1.57549	0.0220798	0.128239	0.107099	7316/7704/5695/7314/9817/5698/5713/6233/6923/55294/5690
R-HSA-912446	Meiotic recombination	18	0.573868	1.54184	0.0225344	0.129786	0.10839	8357/8358/472/8355/1017/10111/5889/3014/675
R-HSA-5693532	DNA Double-Strand Break Repair	42	0.460334	1.53984	0.0227036	0.129786	0.10839	7316/7314/472/6233/2138/1017/10111/7157/5893/2237/5889/11200/9156/3014/675/9656/1111/5111/8900/57804/7468
R-HSA-450408	AUF1 (hnRNP D0) binds and destabilizes mRNA	13	0.631878	1.5813	0.0229451	0.130142	0.108687	7316/3303/5695/7314/5698/5713/6233
R-HSA-73857	RNA Polymerase II Transcription	284	0.288785	1.29553	0.0239431	0.13475	0.112536	1337/8357/7316/8358/54541/10628/4869/1327/1329/8784/595/25824/650/6794/1021/639/6790/5695/891/1378/6427/2744/7314/79869/208/5934/8841/1340/472/348/2064/4094/6046/5698/5781/665/6095/7027/843/3977/2908/5600/5713/6233/2146/4848/8355/6929/6097/83737/2737/1956/6923/4194/4609/1647/5308/27113/1017/10111/23429/8797/2903/55294/4089/3486/58508/648/8289/5690/8793/1051/3845/6932/1026/9134/6667/83860/79885/55…
R-HSA-69615	G1/S DNA Damage Checkpoints	26	0.520454	1.56587	0.0242208	0.135264	0.112965	7316/5695/7314/472/5698/5713/6233/4194/1017/5690/1026/9134/7157/1027/11200/1111/898
R-HSA-5607761	Dectin-1 mediated noncanonical NF-kB signaling	18	0.567066	1.52356	0.0254679	0.139474	0.116481	7316/5695/7314/5698/5713/6233/1147
R-HSA-5625740	RHO GTPases activate PKNs	10	0.667282	1.56787	0.0255907	0.139474	0.116481	388/8357/8358
R-HSA-5693567	HDR through Homologous Recombination (HRR) or Single Strand Annealing (SSA)	33	0.475171	1.50981	0.0257432	0.139474	0.116481	7316/7314/472/6233/1017/10111/5893/5889/9156/3014/675/9656/1111/5111/8900/57804/7468
R-HSA-5689603	UCH proteinases	17	0.584397	1.53801	0.0271648	0.146086	0.122003	7316/7048/5695/7314/5698/171023/5713/6233
R-HSA-5696395	Formation of Incision Complex in GG-NER	11	0.655252	1.58334	0.0276471	0.147587	0.123256	7316/7314/7507/6233
R-HSA-9612973	Autophagy	15	0.599616	1.54101	0.0287027	0.152103	0.127028	7316/7314/472/6233
R-HSA-1236974	ER-Phagosome pathway	31	0.484284	1.49921	0.0339844	0.178787	0.149313	7316/6892/5695/3146/7314/5698/5713/6233/567/1147/5690/6890
R-HSA-453274	Mitotic G2-G2/M phases	40	0.441772	1.46212	0.0348591	0.18207	0.152055	7316/6790/5695/891/7314/5698/5713/6233/7465/1017/5347/2305/5690/1026/1871/7157/1869/9088/5577
R-HSA-1257604	PIP3 activates AKT signaling	114	0.344506	1.38992	0.0422168	0.217372	0.181537	7316/8870/5880/5695/2264/7314/208/8841/2064/5698/5781/1958/8503/2323/5713/6233/2146/5295/9173/1956/2248/1147/5155/8817/51135/930/8658/648/5690/2254/1026/29851/90865/2263/7189/55615/2246/7157/10014/2253/1027/3066/1386/4254/2322/207/5468/2250/253260/941/3725/2534/942/3654/2251/5518/2249/5728/2885/5595
R-HSA-68867	Assembly of the pre-replicative complex	19	0.554844	1.52848	0.0429937	0.219813	0.183576	7316/5695/7314/5698/5713/6233/23594/5690/1871/1869/4171
R-HSA-6804757	Regulation of TP53 Degradation	23	0.529628	1.54904	0.0443262	0.222973	0.186215	7316/7314/208/472/6233/4194/1017/55615/7157/11200/207/253260/8900/5518
R-HSA-69002	DNA Replication Pre-Initiation	23	0.523883	1.53223	0.0443262	0.222973	0.186215	7316/5695/7314/5698/5713/6233/1017/23594/5690/1871/1869/4171
R-HSA-1474165	Reproduction	27	0.510011	1.53651	0.0448833	0.222973	0.186215	8357/8358/472/3306/8355/1017/10111/8243/5889/5885/3014/27127/675
R-HSA-5213460	RIPK1-mediated regulated necrosis	14	0.591605	1.50155	0.0454545	0.222973	0.186215	7316/330/7314/6233/11035/8797/8743
R-HSA-5675482	Regulation of necroptotic cell death	14	0.591605	1.50155	0.0454545	0.222973	0.186215	7316/330/7314/6233/11035/8797/8743
R-HSA-400253	Circadian Clock	19	0.552048	1.52077	0.0472139	0.228862	0.191133	7316/7314/8841/6095/2908/6233
R-HSA-983712	Ion channel transport	11	0.629401	1.52087	0.0472855	0.228862	0.191133	7316/7314/488/6233/11035
R-HSA-1168372	Downstream signaling events of B Cell Receptor (BCR)	35	0.456533	1.4674	0.0502693	0.24	0.200435	7316/5695/7314/5698/4772/5713/6233/1147/4792/5690/4893/3845
R-HSA-3247509	Chromatin modifying enzymes	42	0.434338	1.45288	0.0508772	0.24	0.200435	8357/8358/595/8841/2146/8355/58508/8289/5970/64324/3066/1386/3014/57492/8242/83933/7468/1387/2033
R-HSA-4839726	Chromatin organization	42	0.434338	1.45288	0.0508772	0.24	0.200435	8357/8358/595/8841/2146/8355/58508/8289/5970/64324/3066/1386/3014/57492/8242/83933/7468/1387/2033
R-HSA-1234176	Oxygen-dependent proline hydroxylation of Hypoxia-inducible Factor Alpha	15	0.586075	1.50621	0.0509091	0.24	0.200435	7316/5695/7314/5698/5713/6233/6923
R-HSA-9687139	Aberrant regulation of mitotic cell cycle due to RB1 defects	17	0.561112	1.47673	0.0536673	0.248328	0.20739	595/1021/1028/7027/1017/1026/9134/1871/1027/1869
R-HSA-174084	Autodegradation of Cdh1 by Cdh1:APC/C	12	0.614792	1.52357	0.054007	0.248328	0.20739	7316/5695/7314/5698/5713/6233
R-HSA-3858494	Beta-catenin independent WNT signaling	46	0.416662	1.40704	0.0542495	0.248328	0.20739	7316/2792/2788/5880/5695/7314/5698/4772/5713/6233/5881/7855
R-HSA-9604323	Negative regulation of NOTCH4 signaling	16	0.575349	1.49035	0.0543478	0.248328	0.20739	7316/5695/7314/5698/5713/6233/55294/5690
R-HSA-392451	G beta:gamma signalling through PI3Kgamma	10	0.643865	1.51284	0.054386	0.248328	0.20739	2792/2788/208
R-HSA-176408	Regulation of APC/C activators between G1/S and early anaphase	21	0.524598	1.48723	0.0550622	0.249845	0.208657	7316/5695/891/7314/5698/5713/6233/1017/5347/5690
